# Supplementary material for: Determination of 465 psychoactive substances, drugs and their metabolites in urine by LC-MS/MS
Source: Royal Society of Chemistry journal article supplement (doi:10.1039/d4ay00777h), 2024-01-01

## Determination of 465 psychoactive substances, drugs and their metabolites in urine by LC-MS/MS

Jakub Czarny<sup>a</sup>, Jadwiga Musiał<sup>a,b\*</sup>, Jolanta Powierska-Czarny<sup>a</sup>, Michał Raczkowski<sup>a</sup>, Natalia Galant<sup>a</sup>, Bogusław Buszewski<sup>b</sup>, Renata Gadzała-Kopciuch<sup>b</sup>

*a) Institute of Forensic Genetics, Al. Mickiewicza 3/4, 85-071 Bydgoszcz, Poland*

*b) Department of Environmental Chemistry and Bioanalytics, Faculty of Chemistry, Nicolaus Copernicus University in Toruń, 7 Gagarin St., 87-100 Toruń, Poland*

*\*[jadwiga.musial92@gmail.com](mailto:jadwiga.musial92@gmail.com)*

Table S1. Summary of operating parameters LC-MS/MS and MRM pairs for each compound studied.

| ANALYTE (CAS number)                                            | Precursor Ion (Q1) | Product Ion (Q3) | DP  | EP | CE for 1stMRM / 2nd MRM | CXP for 1stMRM / 2nd MRM | ANALYTE (CAS number)           | Precursor Ion (Q1) | Product Ion (Q3) | DP  | EP | CE for 1stMRM / 2nd MRM | CXP for 1stMRM / 2 MRM |
|-----------------------------------------------------------------|--------------------|------------------|-----|----|-------------------------|--------------------------|--------------------------------|--------------------|------------------|-----|----|-------------------------|------------------------|
| 4-CHLORO-ALPHA-PVP (5881-77-6)                                  | 266.300            | 125.1;<br>126.1  | 101 | 10 | 33/37                   | 10/18                    | bk-2C-B (2303508-66-7)         | 274.896            | 163.0;<br>178.1  | 81  | 10 | 39/21                   | 39/21                  |
| 1-(2-METHOXYPHENYL)PIPERAZINE (38869-49-7)                      | 193.263            | 120.1;<br>150.1  | 106 | 10 | 43/25                   | 8/18                     | bk-MDA (80535-73-5)            | 194.195            | 146.0;<br>118.1  | 56  | 10 | 19/31                   | 14/14                  |
| 1-(3-TRIFLUOROMETHYLPHENYL)PIPERAZINE (TFMPP) (1605-69-3)       | 231.278            | 188;<br>118.0    | 141 | 10 | 31/51                   | 22/16                    | BMPEA (20388-87-8)             | 136.133            | 91.0;<br>119.1   | 46  | 10 | 25/11                   | 10/16                  |
| 1-(4-CHLOROPHENYL)PIPERAZINE (pCPP) (38212-33-8)                | 197.469            | 119.1;<br>118.1  | 121 | 10 | 33/45                   | 14/16                    | BROMO-DRAGON-FLY (219986-78-4) | 293.977            | 276.9            | 71  | 10 | 15                      | 42                     |
| 1,4-DIBENZYLPIPERAZINE (2289-55-7)                              | 267.107            | 91.0;<br>65.1    | 111 | 10 | 47/91                   | 12/10                    |                                | 296.128            | 278.9            | 81  | 10 | 17                      | 12                     |
| 1-AMINOINDAN (34698-41-4)                                       | 134.019            | 117.1;<br>115.1  | 56  | 10 | 15/33                   | 14/14                    | BUPRENORPHINE (53152-21-9)     | 468.189            | 55.0;<br>152.0   | 116 | 10 | 95/117                  | 12/10                  |
| 1-METHYL-4-BENZYLPIPERAZINE (374898-00-7)                       | 191.061            | 91.0;<br>65.0    | 86  | 10 | 31/63                   | 12/10                    | BUPROPION (31677-93-7)         | 239.672            | 184.0;<br>131.1  | 66  | 10 | 17/37                   | 24/16                  |
| 1-METHYLAMINO-1-(3,4-METHYLENEDIOXYPHENYL)PROPANE (127292-43-7) | 194.261            | 163.0;<br>105.1  | 61  | 10 | 13/33                   | 22/16                    | BUTYLONE (17763-12-1)          | 222.185            | 174.1;<br>204.1  | 66  | 10 | 25/17                   | 20/10                  |
| 2,3-DICHLOROPHENYLPIPERAZINE (119532-26-2)                      | 230.937            | 188;<br>152.0    | 91  | 10 | 27/45                   | 24/20                    | CAMFETAMINE (92499-19-9)       | 202.289            | 91.0; 67.0       | 76  | 10 | 43/25                   | 14/14                  |

|                                           |         |                 |     |    |        |       |                                        |         |                 |     |    |       |       |
|-------------------------------------------|---------|-----------------|-----|----|--------|-------|----------------------------------------|---------|-----------------|-----|----|-------|-------|
| 2,3-DIMETHYLETHCATHINONE (2705531-06-0)   | 206.062 | 188.1;<br>158.1 | 91  | 10 | 17/39  | 24/20 | CANNABIDIOL (13956-29-1)               | 315.323 | 193.0;<br>123.0 | 121 | 10 | 29/43 | 10/16 |
| 2,3-DIMETHYLMETHCATHINONE (1797981-99-7)  | 192.202 | 174.0;<br>159.1 | 66  | 10 | 17/27  | 20/20 | CARBAMAZEPINE (298-46-4)               | 237.209 | 194.1;<br>192.1 | 111 | 10 | 27/45 | 24/24 |
| 2,3-ETHYLONE ISOMER (2749504-06-9)        | 222.247 | 174.1;<br>146.1 | 86  | 10 | 23/35  | 8/8   | CATHINE (492-39-7)                     | 152.256 | 134.1;<br>117.1 | 51  | 10 | 13/23 | 22/14 |
| 2,3-MDMA (168968-01-2)                    | 194.351 | 135.0;<br>77.0  | 91  | 10 | 25/53  | 18/12 | CATHINONE (71031-15-7)                 | 150.030 | 132.1;<br>117.1 | 56  | 10 | 17/31 | 18/14 |
| 2,3-MDPV (24622-62-6)                     | 276.236 | 135.0;<br>126.1 | 91  | 10 | 31/37  | 16/14 | CB-13 (432047-72-8)                    | 369.100 | 127.0;<br>170.7 | 151 | 10 | 61/39 | 20/24 |
| 2,4,5-TRIMETHOXYAMPHETAMINE (15995-72-9)  | 226.297 | 209.1;<br>179.1 | 76  | 10 | 15/35  | 10/10 | CBL-018 (2365471-54-9)                 | 358.214 | 214.1;<br>144.1 | 76  | 10 | 21/49 | 10/20 |
| 2,4-DIMETHYLMETHCATHINONE (2412098-39-4)) | 192.190 | 174.1;<br>159.0 | 76  | 10 | 17/27  | 20/18 | CI2201 (1391486-12-6)                  | 394.203 | 188.9           | 151 | 10 | 37/35 | 24/24 |
| 2,4-DMEC (2702352-15-4)                   | 206.063 | 188.1;<br>158.1 | 41  | 10 | 17/47  | 12/20 |                                        | 396.214 | 191.0           |     |    |       |       |
| 2,5-DMMA (54687-43-3)                     | 210.264 | 151.1;<br>121.1 | 56  | 10 | 23/35  | 20/16 | CLOBAZAM (22316-47-8)                  | 301.995 | 260.0;<br>225.0 | 151 | 10 | 29/45 | 12/26 |
| 25B-NBF (1539266-17-5)                    | 368.124 | 243.0           | 106 | 10 | 27     | 12    | CLOMIPRAMINE (17321-77-6)              | 315.043 | 86.1; 58.0      | 106 | 10 | 23/65 | 12/8  |
|                                           | 370.116 | 245.0           | 131 | 10 | 27     | 12    | CLONAZEPAM (1622-61-3)                 | 316.097 | 270.1;<br>214.3 | 151 | 10 | 35/45 | 12/22 |
| 25C-NBF (1539266-21-1)                    | 324.164 | 199.0;<br>184.0 | 111 | 10 | 25/37  | 10/10 | COCAETHYLENE (529-38-4)                | 318.094 | 196.1;<br>82.0  | 101 | 10 | 27/39 | 24/12 |
| 25C-NBOH (1539266-20-0)                   | 322.138 | 199.0;<br>77.0  | 101 | 10 | 27/85  | 24/12 | COCAINE (50-36-2)                      | 304.198 | 182.1;<br>77.1  | 106 | 10 | 27/79 | 22/12 |
| 25C-NBOMe (1539266-19-7)                  | 336.160 | 121.1;<br>91.1  | 96  | 10 | 25/59  | 14/12 | CODEINE (76-57-3)                      | 300.058 | 152.0;<br>115.1 | 136 | 10 | 85/95 | 18/16 |
| 25D-NBOMe (1539266-35-7)                  | 316.169 | 91.0;<br>121.0  | 81  | 10 | 57/25  | 12/16 | CUMYL-PICA (1400742-32-6)              | 349.217 | 231.1;<br>91.0  | 86  | 10 | 21/73 | 12/12 |
| 25E-NBOMe (1539266-39-1)                  | 330.231 | 91.0;<br>121.1  | 106 | 10 | 61/27  | 12/16 | D2PM (172152-19-1)                     | 254.299 | 236.2;<br>130.1 | 81  | 10 | 19/39 | 12/8  |
| 25G-NBOMe (1797132-54-7)                  | 330.142 | 91.0;<br>121.1  | 81  | 10 | 61/27  | 12/14 | DEMOPXEPAM (963-39-3)                  | 286.956 | 179.9;<br>269.0 | 131 | 10 | 31/37 | 22/12 |
| 25H-NBOMe (1566571-52-5)                  | 302.346 | 91.0;<br>121.1  | 81  | 10 | 55/23  | 12/18 | DESALKYLFLURAZEPAM (2886-65-9)         | 289.917 | 140.0;<br>141.0 | 116 | 10 | 39/39 | 18/18 |
| 25-I-NB2OMe (1943868-97-8)                | 428.183 | 91.0;<br>121.0  | 121 | 10 | 75/27  | 12/16 | DESCHLOROETIZOLAM (40054-73-7)         | 310.255 | 281.0;<br>356.0 | 151 | 10 | 33/31 | 12/12 |
| 25I-NB3OMe (1566571-40-1)                 | 428.176 | 121.1;<br>91.1  | 131 | 10 | 33/75  | 14/12 | DESCHLORO-N-ETHYL-KETAMINE (4551-92-2) | 218.287 | 91.0;<br>145.1  | 96  | 10 | 39/23 | 10/8  |
| 25I-NB4OMe (1566571-64-9)                 | 428.177 | 121.1;<br>78.0  | 91  | 10 | 21/113 | 16/10 | DESIPRAMINE (50-47-4)                  | 267.085 | 72.1; 44.1      | 71  | 10 | 21/63 | 10/8  |
| 25I-NBF (1539266-13-1)                    | 416.016 | 290.8;<br>276.0 | 121 | 10 | 29/43  | 12/14 | DESMETHYLDIAZEPAM (1088-11-5)          | 271.978 | 209.1;<br>140.0 | 141 | 10 | 39/39 | 26/18 |
| 25I-NBMD (1539266-14-2)                   | 442.154 | 135.1;<br>77.0  | 116 | 10 | 31/93  | 16/12 | DESMETHYLFLUNITRAZEPAM (2558-30-7)     | 299.977 | 254.1;<br>198.0 | 116 | 10 | 35/53 | 12/24 |
| 25I-NBOH (1539266-12-0)                   | 414.121 | 291.0;          | 101 | 10 | 31/23  | 12/14 | DESOMORPHINE (427-00-9)                | 272.254 | 167.1;          | 126 | 10 | 49/73 | 20/18 |

|                                        |         |                 |     |    |       |       |                             |         |                 |       |    |        |       |     |
|----------------------------------------|---------|-----------------|-----|----|-------|-------|-----------------------------|---------|-----------------|-------|----|--------|-------|-----|
|                                        |         | 307.9           |     |    |       |       |                             |         |                 | 152.1 |    |        |       |     |
| 25N-NBOMe (1566571-65-0)               | 347.200 | 91.0;<br>121.1  | 86  | 10 | 59/23 | 12/16 | DESOXY-D2PM (188398-87-0)   | 238.301 | 91.0;<br>117.1  | 101   | 10 | 33/23  | 12/8  |     |
| 25T2-NBOMe (1539266-51-7)              | 362.264 | 91.0;<br>121.1  | 121 | 10 | 59/27 | 10/14 | DESOXYPIPRADROL (5807-81-8) | 252.331 | 91.1; 65.0      | 91    | 10 | 49/85  | 12/10 |     |
| 25T-NBOMe (1539266-47-1)               | 348.035 | 91.1;<br>121.1  | 96  | 10 | 63/27 | 14/16 | DEXTROMETHORPHAN (125-71-3) | 272.289 | 128.1;<br>171.0 | 126   | 10 | 81/51  | 16/20 |     |
| 2-AMINO-1-PHENYLBUTANE (20735-15-3)    | 150.209 | 91.0;<br>65.0   | 61  | 10 | 23/49 | 12/10 | DIAZEPAM (439-14-5)         | 285.397 | 154.0;<br>193.0 | 166   | 10 | 37/43  | 20/24 |     |
| 2-AMINOINDANE (2338-18-3)              | 134.257 | 117.1;<br>115.1 | 51  | 10 | 19/33 | 14/14 | DICLAZEPAM (2894-68-0)      | 320.306 | 228.0;<br>89.0  | 166   | 10 | 43/103 | 28/12 |     |
| 2-BROMOAMPHETAMINE (861006-36-2)       | 214.186 | 169.0           | 61  | 10 | 27    | 8     | DICLOFENSINE (34041-84-4)   | 322.115 | 121.1;<br>279.0 | 151   | 10 | 33/29  | 16/14 |     |
|                                        | 216.192 | 170.9           | 56  | 10 | 27    | 20    | DIETHYLCATHINONE (134-80-5) | 206.061 | 105.1;<br>100.1 | 81    | 10 | 31/29  | 12/14 |     |
| 2-BROMOMETHAMPHETAMINE (23695-11-6)    | 228.188 | 169.0           | 71  | 10 | 29/27 | 20/10 | DIHYDROCODEINE (125-28-0)   | 302.062 | 199.0;<br>128.1 | 121   | 10 | 43/81  | 26/16 |     |
|                                        | 230.177 | 171.0           |     |    |       |       | DIMETHOCAINE (553-63-9)     | 279.175 | 120.1;<br>65.0  |       |    |        |       | 106 |
| 2C-B (56281-37-9)                      | 259.957 | 243.0;<br>227.9 | 51  | 10 | 17/29 | 12/10 | DIMETHYLONE (109367-07-9)   | 222.209 | 72.2; 91.0      | 86    | 10 | 25/49  | 10/12 |     |
| 2C-B_FLY (178557-21-6)                 | 283.976 | 267.0;<br>188.1 | 106 | 10 | 21/33 | 12/24 | DIPHENHYDRAMINE (147-24-0)  | 256.071 | 167.1;<br>165.1 | 56    | 10 | 17/57  | 22/22 |     |
| 2C-C (88441-15-0)                      | 216.441 | 199.0;<br>184.0 | 76  | 10 | 15/27 | 24/22 | DIPHENIDINE (28383-15-5)    | 266.099 | 181.1;<br>103.1 | 76    | 10 | 25/47  | 22/12 |     |
| 2C-D (25505-65-1)                      | 195.583 | 179.0;<br>164.1 | 71  | 10 | 15/25 | 24/20 | DiPT (14780-24-6)           | 244.891 | 114.2;<br>144.1 | 81    | 10 | 21/31  | 14/20 |     |
| 2C-G (327175-14-4)                     | 210.052 | 178.0;<br>163.0 | 76  | 10 | 23/37 | 22/20 | DL-4662 (1674389-55-9)      | 266.292 | 248.1;<br>188.0 | 86    | 10 | 19/35  | 12/22 |     |
| 2-CHLOROAMPHETAMINE (35334-29-3)       | 170.196 | 125.0;<br>89.0  | 61  | 10 | 25/51 | 16/14 | DOI (42203-78-1)            | 322.068 | 304.9;<br>277.0 | 61    | 10 | 17/27  | 12/12 |     |
| 2C-I (64584-32-3)                      | 307.947 | 291.0;<br>276.0 | 66  | 10 | 19/31 | 12/12 | DOTHIEPIN (113-53-1)        | 296.089 | 202.0;<br>220.9 | 86    | 10 | 75/61  | 26/28 |     |
| 2C-P (1359704-27-0)                    | 224.065 | 207.1;<br>192.1 | 66  | 10 | 15/25 | 10/24 | DOXEPIN (1229-29-4)         | 279.918 | 107.1;<br>77.0  | 101   | 10 | 31/73  | 14/10 |     |
| 2C-T-7 (850140-15-7)                   | 256.022 | 239.1;<br>91.1  | 71  | 10 | 17/63 | 10/12 | DOXYLAMINE (469-21-6)       | 271.067 | 167.1;<br>182.0 | 61    | 10 | 49/23  | 22/22 |     |
| 2C-TFM (159277-13-1)                   | 250.269 | 233.1;<br>218.0 | 91  | 10 | 17/29 | 10/12 | EAM-2201 (1364933-60-7)     | 388.297 | 183.1;<br>153.0 | 81    | 10 | 35/65  | 10/20 |     |
| 2-FEC (2446466-63-1)                   | 196.255 | 148.1;<br>135.1 | 76  | 10 | 41/37 | 18/10 | EDDP (31161-17-8)           | 278.507 | 234.2;<br>249.1 | 86    | 10 | 41/33  | 10/10 |     |
| 2-FIC (1909305-71-0)                   | 168.199 | 123.1;<br>103.1 | 61  | 10 | 21/33 | 14/14 | EG-2201 (2365471-72-1)      | 410.225 | 155.0;<br>127.1 | 181   | 10 | 33/71  | 22/16 |     |
| 2-FLUOROAMPHETAMINE (1626-69-3)        | 154.130 | 109.0;<br>137.1 | 61  | 10 | 23/13 | 14/16 | ERGOMETRINE (60-79-7)       | 326.400 | 223.1;<br>208.1 | 116   | 10 | 31/39  | 10/10 |     |
| 2-FLUOROMETHAMPHETAMINE (1780004-19-4) | 168.247 | 109.1;<br>83.1  | 61  | 10 | 25/53 | 12/12 | ESTAZOLAM (29975-16-4)      | 295.921 | 268.0;<br>206.0 | 101   | 10 | 33/55  | 12/24 |     |

|                                             |         |                 |     |    |       |       |                                         |         |                 |     |     |         |         |
|---------------------------------------------|---------|-----------------|-----|----|-------|-------|-----------------------------------------|---------|-----------------|-----|-----|---------|---------|
| 2-FLUOROMETHCATHINONE (1346599-37-8)        | 182.187 | 164.1;<br>149.0 | 81  | 10 | 19/29 | 22/16 | ETAQUALONE (7432-25-9)                  | 264.918 | 146.1;<br>77.0  | 116 | 10  | 37/89   | 18/12   |
| 2-IODOAMPHETAMINE (22080-10-0)              | 262.178 | 216.9;<br>90.0  | 81  | 10 | 27/47 | 12/12 | ETHCATHINONE<br>METABOLITE (63401-08-1) | 180.064 | 162.1;<br>115.1 | 76  | 10  | 17/39   | 20/14   |
| 2-MAPB (100389-74-0)                        | 190.239 | 58.0;<br>91.1   | 51  | 10 | 19/47 | 8/14  | ETHYLONE (1454266-19-3)                 | 222.228 | 174.1;<br>204.1 | 71  | 10  | 25/19   | 20/10   |
| 2-MeOMC                                     | 194.219 | 176.1;<br>161.1 | 61  | 10 | 17/27 | 10/16 | ETHYLPHENIDATE (214149-46-9)            | 248.328 | 84.1; 56.0      | 111 | 10  | 25/69   | 12/8    |
| 2-METHOXY-2-PHENYLETHYLAMINE (62064-68-0)   | 152.214 | 120.1;<br>77.0  | 61  | 10 | 15/45 | 14/12 | ETIZOLAM (40054-69-1)                   | 343.910 | 315.0;<br>224.1 | 121 | 10  | 35/65   | 14/10   |
| 2-METHOXYAMPHETAMINE (72739-03-8)           | 166.068 | 121.1;<br>149.0 | 56  | 10 | 21/13 | 16/18 | EUTYLONE (17764-18-0)                   | 236.294 | 188.1;<br>189.1 | 96  | 10  | 25/29   | 24/22   |
| 2-METHOXYMETHAMPHETAMINE (5588-10-3)        | 180.322 | 120.9;<br>91.1  | 66  | 10 | 23/39 | 14/8  | FENFLURAMINE (404-82-0)                 | 232.018 | 159.0;<br>109.0 | 86  | 10  | 31/57   | 20/14   |
| 2-METHYLAMINO-1-PHENYLBUTANE (84952-63-6)   | 164.237 | 91.0;<br>65.0   | 71  | 10 | 25/55 | 14/8  | FENTANYL (437-38-7)                     | 337.171 | 188.0;<br>105.0 | 131 | 10  | 29/57   | 10/12   |
| 2-METHYLMETHCATHINONE (1246815-51-9)        | 178.060 | 160.1;<br>145.1 | 76  | 10 | 17/27 | 22/18 | FLUBROMAZEPAM (2647-50-9)               | 334.716 | 226.1;<br>186.0 | 161 | 10  | 39/41   | 10/22   |
| 2-METHYL-PBP (22198-75-0)                   | 232.265 | 105.1;<br>91.0  | 116 | 10 | 33/53 | 12/12 | FLUDIAZEPAM (3900-31-0)                 | 303.922 | 212.0;<br>89.0  | 141 | 10  | 43/93   | 26/12   |
| 2-METHYL-PPP (2749897-10-5)                 | 218.291 | 98.1;<br>119.1  | 116 | 10 | 31/31 | 16/8  | FLUMAZENIL (78755-81-4)                 | 303.986 | 258.1;<br>217.0 | 81  | 10  | 23/35   | 12/26   |
| 3,4-DICHLOROMETHYLPHENIDATE (214149-42-5)   | 303.454 | 84.1;<br>56.0   | 121 | 10 | 27/77 | 12/8  | FLUNITRAZEPAM (1622-62-4)               | 313.814 | 268.0;<br>239.0 | 136 | 10  | 35/47   | 12/12   |
| 3,4-DIMETHOXY-ALPHA-PVP (850351-99-4)       | 292.246 | 151.0;<br>126.1 | 116 | 10 | 35/33 | 22/12 | FLUOXETINE (56296-78-7)                 | 310.021 | 44.1;<br>148.1  | 51  | 10  | 43/11   | 8/18    |
| 3,4-DIMETHYLMETHCATHINONE (1081772-06-6)    | 192.031 | 174.1;<br>159.2 | 81  | 10 | 17/27 | 20/18 | FLURAZEPAM (17617-23-1)                 | 388.023 | 315.0;<br>107.0 | 91  | 10  | 31/111  | 14/14   |
| 3,4-DMEC (2748561-69-3)                     | 206.146 | 158.1;<br>115.1 | 86  | 10 | 43/67 | 14/6  | FUB-144 (2185863-15-2)                  | 350.227 | 109.1;<br>125.1 | 111 | 10  | 61/29   | 14/14   |
| 3,4-DMMA (70932-18-2)                       | 210.063 | 179.1;<br>151.1 | 61  | 10 | 17/29 | 22/20 | FUB-JWH-018 (2365471-45-8)              | 380.203 | 155.1;<br>109.0 | 176 | 10  | 33/63   | 8/18    |
| 3,4-EDMA (2748304-41-6)                     | 208.248 | 177.1;<br>149.1 | 61  | 10 | 19/29 | 10/20 | FUB-NPB-22 (2244864-90-0)               | 398.186 | 253.0;<br>109.1 | 86  | 10  | 23/47   | 12/8    |
| 3,4-EDMC (30253-44-2)                       | 222.191 | 204.0;<br>189.1 | 61  | 10 | 19/29 | 10/10 | FURANYLFENTANYL<br>(101365-56-4)        | 375.290 | 105.1;<br>188.1 | 136 | 10  | 55/29   | 14/20   |
| 3,4-MDMA (64057-70-1)                       | 194.025 | 163.1;<br>105.1 | 76  | 10 | 17/33 | 20/14 | GHB (502-85-2)                          | 102.935 | 85.0; 57.0      | -75 | -10 | -10/-10 | -12/-18 |
| 3,4-MDPA (74341-77-8)                       | 222.051 | 163.0;<br>105.1 | 81  | 10 | 19/35 | 20/14 | HARMALINE (302-21-2)                    | 215.051 | 174.0;<br>171.9 | 61  | 10  | 29/37   | 10/18   |
| 3,4-MDPPH (24622-61-5)                      | 290.285 | 135.1;<br>140.2 | 131 | 10 | 35/35 | 16/18 | HARMINE (442-51-3)                      | 212.795 | 170.1;<br>198.0 | 121 | 10  | 41/31   | 20/26   |
| 3,4-METHYLENEDIOXYPYROVALERONE (24622-62-6) | 276.144 | 126.1;13<br>5.1 | 76  | 10 | 31/41 | 12/8  | HYDROCODONE (125-29-1)                  | 300.050 | 199.0;<br>128.1 | 131 | 10  | 39/77   | 24/16   |
| 3,4-METHYLENEDIOXY_PV9 (24646-40-0)         | 318.230 | 135.1;<br>168.2 | 166 | 10 | 35/39 | 8/20  | IBOGAINE (5934-55-4)                    | 312.288 | 122.1;<br>77.0  | 281 | 10  | 43/119  | 14/12   |

|                                        |         |                 |     |    |       |       |                                              |         |                 |     |    |        |       |
|----------------------------------------|---------|-----------------|-----|----|-------|-------|----------------------------------------------|---------|-----------------|-----|----|--------|-------|
| 30C-NBOMe (2749391-65-7)               | 396.257 | 181.1;<br>148.1 | 61  | 10 | 23/59 | 10/18 | IMIPRAMINE (113-52-0)                        | 281.078 | 86.1; 58.1      | 66  | 10 | 21/59  | 12/8  |
| 3-BROMOAMPHETAMINE (1210708-61-4)      | 214.192 | 168.9           | 46  | 10 | 25/25 | 20/14 | ISOPENTEDRONE (1429402-13-0)                 | 192.055 | 91.0;<br>161.0  | 71  | 10 | 33/17  | 12/22 |
|                                        | 216.189 | 171.1           |     |    |       |       | JWH 018 BENZIMIDAZOLE ANALOG (2316839-70-8)  | 343.221 | 126.6;<br>155.1 | 121 | 10 | 109/41 | 16/20 |
| 3-BROMOMETHAMPHETAMINE (28100-41-6)    | 228.180 | 169.0           | 86  | 10 | 27/27 | 22/20 | JWH-011 (155471-13-9)                        | 384.202 | 155.1;<br>127.1 | 151 | 10 | 37/71  | 16/14 |
|                                        | 230.202 | 170.9           |     |    |       |       | JWH-018 ADAMANTYL CARBOXAMIDE (1345973-50-3) | 365.291 | 135.1;<br>77.0  | 156 | 10 | 37/109 | 20/12 |
| 3-BROMOMETHCATHINONE (676487-42-6)     | 244.143 | 145.0           | 86  | 10 | 23/25 | 20/22 | JWH-022 (209414-16-4)                        | 340.223 | 155.1;<br>127.1 | 136 | 10 | 31/61  | 8/16  |
|                                        | 242.128 | 145.1           |     |    |       |       | JWH-031 (162934-74-9)                        | 306.155 | 127.1;<br>76.9  | 131 | 10 | 51/95  | 8/6   |
| 3-CAF (2219324-25-9)                   | 383.161 | 239.0;<br>210.0 | 101 | 10 | 19/65 | 12/24 | JWH-071 (209414-05-1)                        | 300.220 | 127.1;<br>155.1 | 111 | 10 | 57/29  | 16/8  |
| 3C-B-FLY (178557-19-2)                 | 298.069 | 280.9           | 66  | 10 | 21    | 12    | JWH-080 (210179-44-5)                        | 358.107 | 185.0;<br>127.1 | 61  | 10 | 33/69  | 24/16 |
|                                        | 300.079 | 283.0           | 46  | 10 | 17    | 16    | JWH-116 (619294-64-3)                        | 370.219 | 155.2;<br>127.1 | 121 | 10 | 33/69  | 16/6  |
| 3-CHLOROAMPHETAMINE (35378-15-5)       | 170.206 | 125.1;<br>89.0  | 66  | 10 | 25/53 | 14/12 | JWH-145 (914458-19-8)                        | 367.929 | 154.8;<br>127.1 | 91  | 10 | 35/69  | 22/18 |
| 3-CHLOROMETHCATHINONE (1607439-32-6)   | 198.231 | 145.1;<br>144.1 | 76  | 10 | 25/41 | 18/18 | JWH-146 (914458-21-2)                        | 396.312 | 155.1;<br>127.0 | 141 | 10 | 27/71  | 18/22 |
| 3-CHLOROPHENYLPIPERAZINE (13078-15-4)  | 197.249 | 154.1;<br>118.1 | 101 | 10 | 27/47 | 18/14 | JWH-149 (548461-82-1)                        | 370.172 | 169.1;<br>115.2 | 156 | 10 | 35/95  | 26/14 |
| 3C-P (2749897-26-3)                    | 254.286 | 195.1;<br>107.1 | 56  | 10 | 19/35 | 10/14 | JWH-167 (864445-37-4)                        | 306.156 | 91.1;<br>214.2  | 86  | 10 | 31/35  | 12/30 |
| 3-DESOXY-3,4-MDPV (2117405-33-9)       | 274.249 | 126.1;<br>133.1 | 126 | 10 | 31/37 | 18/16 | JWH-175 (619294-35-8)                        | 328.281 | 141.1;<br>115.1 | 106 | 10 | 29/83  | 18/14 |
| 3-ETHYLMETHCATHINONE (2446466-60-8)    | 192.220 | 174.1;<br>144.1 | 66  | 10 | 17/43 | 22/18 | JWH-182 (824960-02-3)                        | 384.268 | 197.0;<br>141.0 | 196 | 10 | 33/61  | 10/14 |
| 3-FEC (2446466-64-2)                   | 196.262 | 135.1;<br>148.1 | 81  | 10 | 39/41 | 18/18 | JWH-193 (133438-58-1)                        | 399.123 | 169.1;<br>115.0 | 116 | 10 | 31/97  | 10/6  |
| 3-FLUORO-ALFA-PPP (1214940-15-4)       | 222.280 | 123.1;<br>98.1  | 86  | 10 | 31/33 | 12/14 | JWH-198 (166599-76-4)                        | 415.117 | 185.1;<br>114.2 | 181 | 10 | 33/35  | 22/10 |
| 3-FLUOROAMPHETAMINE (1716-59-2)        | 154.134 | 109.0;<br>137.1 | 76  | 10 | 25/13 | 14/16 | JWH-201 (864445-47-6)                        | 336.263 | 121.1;<br>77.0  | 151 | 10 | 35/77  | 16/10 |
| 3-FLUOROMETHAMPHETAMINE (1324717-74-9) | 168.223 | 109.1;<br>83.1  | 76  | 10 | 27/53 | 18/10 | JWH-213 (824959-83-3)                        | 384.326 | 183.1;<br>153.1 | 181 | 10 | 35/61  | 22/18 |
| 3-FLUOROMETHCATHINONE (246600-40-5)    | 182.014 | 164.1;<br>149.1 | 81  | 10 | 19/27 | 20/18 | JWH-307 (914458-26-7)                        | 386.153 | 155.0;<br>127.1 | 66  | 10 | 27/81  | 24/16 |
| 3-HYDROXYBROMAZEPAM (13132-73-5)       | 331.895 | 286.9;<br>314.9 | 106 | 10 | 27/21 | 12/14 | JWH-309 (914458-42-7)                        | 418.325 | 155.0;<br>127.1 | 141 | 10 | 29/77  | 20/16 |
| 3-HYDROXYFLUNITRAZEPAM (67739-71-3)    | 330.031 | 238.0;<br>284.0 | 96  | 10 | 43/27 | 12/12 | JWH-368 (914458-31-4)                        | 386.132 | 155.1;<br>127.0 | 106 | 10 | 29/69  | 20/16 |

|                                      |         |             |     |    |       |       |                              |         |             |     |    |       |       |
|--------------------------------------|---------|-------------|-----|----|-------|-------|------------------------------|---------|-------------|-----|----|-------|-------|
| 3-IODOAMPHETAMINE (20110-56-9)       | 262.179 | 217.0;117.1 | 66  | 10 | 25/43 | 10/14 | JWH-369 (914458-27-8)        | 402.279 | 155.1;127.0 | 126 | 10 | 29/65 | 20/18 |
| 3-MEC (2493976-59-1)                 | 192.185 | 144.2;91.1  | 86  | 10 | 39/47 | 16/14 | JWH-412 (1364933-59-4)       | 360.213 | 173.0;145.1 | 161 | 10 | 33/63 | 10/18 |
| 3-MeOMC (1435933-70-2)               | 194.225 | 161.1;118.1 | 81  | 10 | 25/47 | 20/12 | JWH-424 (1366068-04-3)       | 422.179 | 235.0       | 131 | 10 | 37    | 12    |
| 3-METHOXYAMPHETAMINE (35294-10-1)    | 166.070 | 121.1;91.0  | 41  | 10 | 21/37 | 16/14 |                              | 420.174 | 233.0       | 111 | 10 | 37    | 12    |
| 3-METHOXYPHENCYCLIDINE (72242-03-6)  | 274.190 | 86.1;121.1  | 46  | 10 | 17/37 | 10/14 | KETAMINE (1867-66-9)         | 238.083 | 125.0;89.0  | 61  | 10 | 37/73 | 16/12 |
| 3-METHYLMETHCATHINONE (1246816-62-5) | 178.046 | 160.1;145.1 | 86  | 10 | 17/27 | 20/18 | LAMPA (40158-98-3)           | 324.164 | 223.0;208.0 | 116 | 10 | 33/41 | 28/26 |
| 3-METHYL-PBP                         | 232.266 | 105.1;91.0  | 106 | 10 | 31/55 | 14/12 | LIDOCAINE (137-58-6)         | 235.081 | 86.1; 58.1  | 126 | 10 | 23/51 | 10/10 |
| 3-METHYL-PPP (2749302-38-1)          | 218.209 | 119.3;91.0  | 116 | 10 | 31/49 | 6/8   | LOPRAZOLAM (61197-73-7)      | 464.983 | 252.0;111.1 | 126 | 10 | 57/35 | 12/14 |
| 4,4'-DMAR (1445569-01-6)             | 191.255 | 148.1;91.0  | 61  | 10 | 17/39 | 18/12 | LORAZEPAM (846-49-1)         | 321.924 | 275.9;303.9 | 111 | 10 | 29/21 | 12/14 |
| 4-AcO-DET (1135424-15-5)             | 275.216 | 86.0;160.0  | 81  | 10 | 23/35 | 12/20 | LORMETAZEPAM (848-75-9)      | 335.939 | 289.9;177.9 | 86  | 10 | 29/45 | 14/12 |
| 4-AcO-DMT (2748484-99-1)             | 247.314 | 58.1;160.1  | 81  | 10 | 21/33 | 6/16  | LSD (50-37-3)                | 324.277 | 223.0;207.0 | 101 | 10 | 33/57 | 28/26 |
| 4-AcO-MET (2748591-02-6)             | 261.300 | 72.0;160.0  | 76  | 10 | 21/35 | 10/22 | MAPROTILINE (10347-81-6)     | 278.114 | 191.0;189.0 | 116 | 10 | 47/83 | 24/22 |
| 4-APB (286834-82-0)                  | 176.148 | 131.1;91.0  | 66  | 10 | 25/39 | 16/12 | MBDB (128767-12-4)           | 208.040 | 135.0;77.0  | 51  | 10 | 27/55 | 18/10 |
| 4-APDB (1203342-42-0)                | 178.238 | 161.1;133.1 | 71  | 10 | 13/25 | 22/16 | MDAT (101625-35-8)           | 192.204 | 175.1;117.1 | 66  | 10 | 15/35 | 10/8  |
| 4-BROMO-2,5-DMMA (155638-80-5)       | 288.233 | 257.0       | 61  | 10 | 19    | 12    | MDBP (38063-96-6)            | 221.272 | 135.0;77.0  | 61  | 10 | 23/53 | 10/12 |
|                                      | 290.240 | 259.0       | 56  | 10 | 19    | 12    | MDEA (82801-81-8)            | 208.054 | 163.0;105.0 | 66  | 10 | 19/35 | 20/14 |
| 4-BROMOAMPHETAMINE (58400-88-7)      | 214.182 | 169.0       | 76  | 10 | 25    | 20    | MDMB-CHMINACA (1971007-95-0) | 386.303 | 241.1;145.0 | 156 | 10 | 33/57 | 12/18 |
|                                      | 216.181 | 170.9       | 56  | 10 | 25    | 22    | MDPBP (784985-33-7)          | 262.024 | 161.0;112.1 | 86  | 10 | 31/35 | 20/14 |
| 4-BROMOMETHAMPHETAMINE (30651-67-3)  | 228.205 | 168.9       | 91  | 10 | 29/27 | 20/20 | MECLONAZEPAM (58662-84-3)    | 329.969 | 284.0;238.0 | 91  | 10 | 37/57 | 14/12 |
|                                      | 230.200 | 170.9       |     |    |       |       | MEDAZEPAM (2898-12-6)        | 271.019 | 206.9;165.1 | 126 | 10 | 37/61 | 26/20 |
| 4-BROMOMETHCATHINONE (135333-27-6)   | 243.495 | 145.1;144.1 | 101 | 10 | 23/45 | 18/18 | MEMANITINE (41100-52-1)      | 180.261 | 163.2;107.2 | 56  | 10 | 19/33 | 8/10  |
| 4-CAB (23292-08-2)                   | 184.174 | 125.1;89.0  | 46  | 10 | 25/57 | 16/14 | MEPERIDINE (50-13-5)         | 248.140 | 220.1;91.1  | 121 | 10 | 31/59 | 20/8  |
| 4-CEC (22198-75-0)                   | 212.210 | 159.3;144.1 | 66  | 10 | 25/39 | 8/18  | MEPHTETRAMINE (2749302-69-8) | 190.139 | 44.0;147.1  | 101 | 10 | 31/13 | 8/18  |
| 4-CHLORO-ALPHA-PPP (28117-79-5)      | 238.267 | 139.1;      | 111 | 10 | 33/33 | 16/12 | MEPIRAPIM (2365542-30-7)     | 314.241 | 214.1;      | 66  | 10 | 21/47 | 10/8  |

|                                      |         |                 |     |    |        |       |                                         |         |                 |     |    |       |       |
|--------------------------------------|---------|-----------------|-----|----|--------|-------|-----------------------------------------|---------|-----------------|-----|----|-------|-------|
|                                      |         | 98.1            |     |    |        |       |                                         |         | 144.1           |     |    |       |       |
| 4-CHLOROAMPHETAMINE (3706-38-5)      | 170.197 | 125.0;<br>89.0  | 51  | 10 | 25/53  | 12/12 | MEPROBAMATE (57-53-4)                   | 219.029 | 158.1;<br>55.1  | 66  | 10 | 11/31 | 20/8  |
| 4-CHLOROMETHCATHINONE (2319878-22-1) | 198.000 | 145.1;<br>144.1 | 76  | 10 | 25/41  | 18/18 | MESCALINE (832-92-8)                    | 212.183 | 195.1;<br>77.0  | 76  | 10 | 13/63 | 24/12 |
| 4-CMA (30572-91-9)                   | 184.235 | 125.1;<br>89.0  | 81  | 10 | 29/57  | 14/12 | METHADONE (1095-90-5)                   | 310.094 | 265.1;<br>105.0 | 66  | 10 | 21/35 | 12/14 |
| 4-EAPB (2514946-32-6)                | 204.264 | 131.1;<br>91.0  | 76  | 10 | 29/45  | 10/12 | METHAMPHETAMINE (826-10-8)              | 150.063 | 91.0;<br>119.1  | 51  | 10 | 25/15 | 12/16 |
| 4-ETHYL-N,N-DMC (2702382-98-5)       | 206.207 | 133.2;<br>105.2 | 61  | 10 | 27/35  | 14/18 | METHANDIENONE (72-63-9)                 | 301.060 | 121.2;<br>149.1 | 131 | 10 | 35/21 | 14/18 |
| 4-FEC (2705473-25-0)                 | 196.260 | 148.1;<br>135.1 | 71  | 10 | 41/37  | 18/16 | METHAQUALONE (72-44-6)                  | 251.007 | 132.1;<br>91.0  | 131 | 10 | 37/57 | 18/12 |
| 4-FLUORO BUPHEDRONE (2624137-27-3)   | 196.234 | 149.1;<br>148.1 | 76  | 10 | 31/47  | 18/18 | METHCATHINONE (49656-78-2)              | 164.056 | 131.1;<br>130.1 | 61  | 10 | 27/41 | 18/16 |
| 4-FLUORO PENTEDRONE (2469350-88-5)   | 210.264 | 109.0;<br>74.0  | 86  | 10 | 33/111 | 14/10 | METHEDRONE (879665-92-6)                | 193.998 | 176.0;<br>161.0 | 56  | 10 | 15/31 | 10/6  |
| 4-FLUORO PV8 (2748485-01-8)          | 278.165 | 109.0;<br>95.1  | 126 | 10 | 33/71  | 16/12 | METHOHEXITAL (151-83-7)                 | 263.072 | 221.0;<br>77.1  | 116 | 10 | 19/67 | 10/10 |
| 4-FLUORO PV9 (2117405-40-8)          | 292.257 | 109.1;<br>95.0  | 116 | 10 | 35/71  | 14/14 | METHOXETAMINE (1239908-48-5)            | 248.059 | 121.1;<br>203.0 | 76  | 10 | 37/19 | 16/26 |
| 4-FLUORO-ALFA-PPP (274859-18-1)      | 222.267 | 123.1;<br>98.1  | 86  | 10 | 31/33  | 8/14  | METHOXPHENIDINE (2055777-48-3)          | 297.324 | 129.1;<br>117.1 | 101 | 10 | 27/31 | 16/14 |
| 4-FLUOROMETHAMPHETAMINE (52063-62-4) | 168.214 | 109.1;<br>137.0 | 81  | 10 | 27/15  | 12/18 | METHYLHEXANAMINE (13803-74-2)           | 116.066 | 57.0; 41.1      | 71  | 10 | 17/31 | 8/6   |
| 4-FLUOROMETHCATHINONE (7589-35-7)    | 182.011 | 164.1;<br>149.0 | 71  | 10 | 19/29  | 22/20 | METHYLONE (b186028-80-8)                | 208.272 | 160.0;<br>132.1 | 86  | 10 | 25/37 | 20/14 |
| 4F-PVP (850352-31-7)                 | 250.250 | 109.0;<br>126.1 | 91  | 10 | 31/35  | 12/16 | METHYLPHENIDATE (113-45-1)              | 234.300 | 84.1; 56.0      | 71  | 10 | 23/65 | 10/8  |
| 4-HYDROXY DiPT (63065-90-7)          | 262.005 | 161.1;<br>114.1 | 171 | 10 | 31/21  | 20/14 | MEXEDRONE (2166915-02-0)                | 208.300 | 91.0;<br>119.0  | 76  | 10 | 47/29 | 16/6  |
| 4-HYDROXYMIDAZOLAM (59468-85-8)      | 341.932 | 325.0;<br>297.0 | 121 | 10 | 31/41  | 14/14 | MIANSERIN (24219-97-4)                  | 265.493 | 208.1;<br>58.1  | 146 | 10 | 29/45 | 24/10 |
| 4-iodoamphetamine (21894-58-6)       | 262.177 | 245.0;<br>216.9 | 56  | 10 | 15/27  | 12/12 | MIDAZOLAM (59467-70-8)                  | 326.065 | 291.1;<br>248.9 | 136 | 10 | 37/51 | 12/30 |
| 4-MAPB                               | 190.254 | 131.1;<br>91.0  | 76  | 10 | 27/41  | 18/10 | MITRAGYNINE (4098-40-2)                 | 399.094 | 174.0;<br>159.1 | 136 | 10 | 41/63 | 22/20 |
| 4-MEAP (18297-05-7)                  | 220.297 | 144.1;<br>105.1 | 66  | 10 | 43/29  | 18/12 | MMAI (132980-17-7)                      | 178.131 | 161.0;<br>103.0 | 61  | 10 | 15/53 | 22/14 |
| 4-MEO-ALPHA-PVP (5537-19-9)          | 262.212 | 121.1;<br>191.2 | 91  | 10 | 33/25  | 12/18 | MMB018 (1971007-97-2)                   | 345.251 | 214.1;<br>144.0 | 66  | 10 | 19/51 | 10/20 |
| 4-MeOPBP (2749897-35-4)              | 248.282 | 112.1;<br>121.1 | 101 | 10 | 31/37  | 14/16 | MMB2201 (1971007-87-0)                  | 363.251 | 232.1;<br>144.1 | 81  | 10 | 21/53 | 10/16 |
| 4-METHOXY PHENCYCLIDINE (2185-93-5)  | 274.176 | 121.1;<br>189.1 | 61  | 10 | 39/17  | 14/10 | MN-25 (501926-82-5)                     | 440.336 | 114.1; 261.1    | 141 | 10 | 41/33 | 12/12 |
| 4-METHOXY PV8 (2749302-60-9)         | 290.295 | 121.1;<br>154.2 | 126 | 10 | 35/33  | 16/8  | MN-25-2-METHYL DERIVATIVE (501927-29-3) | 454.347 | 114.1;<br>275.1 | 151 | 10 | 41/31 | 18/14 |

|                                                    |         |                 |     |    |       |       |                                           |         |                 |     |    |       |       |
|----------------------------------------------------|---------|-----------------|-----|----|-------|-------|-------------------------------------------|---------|-----------------|-----|----|-------|-------|
| 4-METHOXY PV9 (2748590-60-3)                       | 304.286 | 121.1;<br>168.2 | 101 | 10 | 35/35 | 14/8  | MO-CHMINACA (2365471-04-9)                | 387.261 | 241.1;<br>145.1 | 121 | 10 | 27/47 | 22/8  |
| 4-METHOXYMETHAMPHETAMINE (3398-68-3)               | 180.289 | 149.0;<br>121.1 | 66  | 10 | 15/27 | 20/14 | MORPHINE (57-27-2)                        | 286.043 | 152.1;<br>128.1 | 176 | 10 | 79/77 | 20/16 |
| 4-METHYL PENTEDRONE (1373918-61-6)                 | 206.274 | 144.1;<br>105.1 | 86  | 10 | 47/29 | 18/14 | MPBP (1214-15-9)                          | 232.059 | 105.1;<br>91.1  | 116 | 10 | 33/57 | 14/12 |
| 4-METHYL-ALPHA-ETHYLAMINOBUTIOPHENONE (18268-19-4) | 206.110 | 188.3;<br>144.2 | 56  | 10 | 19/43 | 22/10 | MT-45 (57314-55-3)                        | 349.380 | 181.0;<br>77.0  | 176 | 10 | 37/93 | 24/12 |
| 4-METHYLAMPHETAMINE (41632-56-8)                   | 150.227 | 105.1;<br>133.1 | 56  | 10 | 23/11 | 16/8  | N-(3-METHYLBENZYL)PIPERAZINE (5321-48-2)  | 191.273 | 105.1;<br>77.0  | 81  | 10 | 27/55 | 14/10 |
| 4-METHYLCATHINONE (31952-47-3)                     | 164.232 | 146.1;<br>131.0 | 71  | 10 | 15/27 | 18/16 | N,N-DIETHYLPHENETHYLAMINE (5300-21-0)     | 178.273 | 105.1;<br>77.0  | 101 | 10 | 25/55 | 10/12 |
| 4-METHYLMETHAMPHETAMINE (161697-16-1)              | 164.250 | 105.1;<br>133.1 | 66  | 10 | 25/15 | 14/16 | N,N-DIMETHYLPENTYLONE (17763-13-2)        | 250.302 | 100.1;<br>135.0 | 101 | 10 | 27/31 | 12/14 |
| 4-METHYLMETHCATHINONE (1189726-22-4)               | 178.066 | 160.1;<br>145.1 | 71  | 10 | 17/27 | 20/18 | N,N-DMT (61-50-7)                         | 189.572 | 58.0;<br>144.1  | 116 | 10 | 19/23 | 8/18  |
| 4-METHYL-N,N-DMC (1448845-14-4)                    | 192.249 | 119.1;<br>72.1  | 101 | 10 | 27/33 | 16/12 | N-ACETYL-3,4-MDMC (1227293-15-3)          | 250.245 | 208.1;<br>160.1 | 76  | 10 | 19/35 | 22/18 |
| 4-METHYL-N-METHYLBUPHEDRONE (2748589-93-5)         | 206.209 | 105.0;<br>90.9  | 51  | 10 | 29/47 | 16/12 | NAPHYRONE (850352-11-3)                   | 282.065 | 140.9;<br>17.0  | 51  | 10 | 37/59 | 10/24 |
| 4-METHYL-N-METHYLHEXANOPHENONE (2168553-84-0)      | 220.287 | 144.1;<br>105.1 | 86  | 10 | 47/29 | 16/14 | NAPHYRONE-1-NAPHTYL ISOMER (1349245-31-3) | 282.125 | 127.0;<br>141.0 | 51  | 10 | 57/37 | 22/10 |
| 4-METHYL-PBP (1214-15-9)                           | 232.310 | 105.1;<br>91.0  | 81  | 10 | 33/55 | 14/12 | N-BENZYLNORBUTYLONE (1823865-05-9)        | 298.241 | 91.1; 65.0      | 96  | 10 | 41/91 | 14/16 |
| 4-METHYL-PHP (1391052-36-0)                        | 260.347 | 105.1;<br>91.1  | 131 | 10 | 33/63 | 14/10 | N-ETHYL-4-METHOXYAMPHETAMINE (93963-24-7) | 194.253 | 121.0;<br>91.0  | 66  | 10 | 29/45 | 16/14 |
| 4-METHYL- $\alpha$ -ETHYLTRYPTAMINE (28289-30-7)   | 203.040 | 144.1;<br>186.0 | 56  | 10 | 29/13 | 20/24 | N-ETHYLBUPHEDRONE (2731709-73-0)          | 192.296 | 130.1;<br>91.0  | 66  | 10 | 39/35 | 10/14 |
| 5-APB (286834-80-8)                                | 176.082 | 44.0;<br>91.0   | 46  | 10 | 23/47 | 8/10  | N-ETHYL-N-METHYLCATHINONE (1157739-24-6)  | 192.099 | 105.0;<br>77.2  | 76  | 10 | 29/57 | 6/14  |
| 5-APDB (152623-94-4)                               | 178.290 | 161.0;<br>133.1 | 56  | 10 | 13/27 | 22/18 | N-ETHYLNORDAZEPAM (5571-65-3)             | 299.364 | 165.1;<br>77.0  | 216 | 10 | 59/89 | 20/10 |
| 5-APDI (152623-95-5)                               | 176.173 | 159.2;<br>131.2 | 71  | 10 | 13/27 | 22/10 | N-ETHYLNORKETAMINE (2525095-53-6)         | 252.180 | 125.0;89.1      | 71  | 10 | 41/75 | 16/14 |
| 5-CHLORO AB-PINACA (1801552-02-2)                  | 365.216 | 320.1           | 91  | 10 | 21    | 14    | N-ETHYLOXAZEPAM (62659-64-7)              | 315.994 | 270.0;<br>242.0 | 116 | 10 | 29/47 | 12/12 |
|                                                    | 367.248 | 322.2           | 86  | 10 | 21    | 14    | N-ETHYLPENTYLONE (17763-02-9)             | 250.269 | 232.2;<br>202.0 | 71  | 10 | 21/27 | 22/12 |
| 5-CHLORO-NNEI (1800101-23-8)                       | 391.226 | 247.9;<br>144.1 | 86  | 10 | 31/55 | 12/8  | NIMETAZEPAM (2011-67-8)                   | 296.187 | 250.1;<br>221.0 | 171 | 10 | 35/45 | 12/26 |
| 5-EAPB (1823776-22-2)                              | 204.961 | 132.1;<br>131.6 | 86  | 10 | 29/29 | 16/16 | NITRACAINE (1648893-21-3)                 | 309.822 | 92.0; 76.0      | 216 | 10 | 57/91 | 12/12 |



|                                               |         |                 |     |    |        |       |                                  |         |                 |     |    |       |       |
|-----------------------------------------------|---------|-----------------|-----|----|--------|-------|----------------------------------|---------|-----------------|-----|----|-------|-------|
| 5F-ABICA (1801338-26-0)                       | 348.070 | 232.1;<br>144.1 | 71  | 10 | 29/53  | 12/18 | NITRAZEPAM (146-22-5)            | 281.974 | 236.0;<br>180.1 | 141 | 10 | 33/51 | 30/24 |
| 5-F-JWH-018 ADAMANTYL ANALOG (1364933-62-9)   | 368.294 | 135.1;<br>77.0  | 171 | 10 | 39/113 | 10/12 | NM2201 (2042201-16-9)            | 376.276 | 232.0;<br>144.1 | 131 | 10 | 21/51 | 12/18 |
| 5-FLUORO THJ (2180934-72-7)                   | 377.255 | 233.1;<br>145.1 | 91  | 10 | 29/53  | 12/14 | N-METHYL-2AI (10408-85-2)        | 148.043 | 117.1;<br>115.1 | 81  | 10 | 23/37 | 14/14 |
| 5-FLUORO-2-ADB-PINACA_ISOMER_2 (2365471-68-5) | 363.254 | 145.1;<br>318.1 | 116 | 10 | 47/29  | 10/14 | N-METHYL-PEA (589-08-2)          | 136.182 | 105.1;<br>77.0  | 51  | 10 | 19/43 | 18/12 |
| 5-FLUORO-CUMYL-PICA (1400742-18-8)            | 367.233 | 249.1;<br>91.0  | 96  | 10 | 21/77  | 12/14 | N-METHYLTRYPTAMINE (61-49-4)     | 175.508 | 144.1;<br>117.1 | 66  | 10 | 17/37 | 18/14 |
| 5-FLUORO-SDB-006 (1776086-02-2)               | 339.222 | 91.0;<br>232.0  | 141 | 10 | 63/31  | 14/10 | NN-DMC (10105-90-5)              | 178.233 | 105.0;<br>72.1  | 91  | 10 | 29/29 | 14/10 |
| 5-F-PENTYL-3-PYRIDINOYLINDOLE                 | 311.223 | 144.1;<br>89.0  | 136 | 10 | 51/99  | 18/12 | NORCLOBAZAM (22316-55-8)         | 286.954 | 245.1;<br>210.0 | 141 | 10 | 27/43 | 12/26 |
| 5F-SDB-005 (2185863-14-1)                     | 377.212 | 233.1;<br>145.1 | 121 | 10 | 15/51  | 10/10 | NORCLOMIPRAMINE (29854-14-6)     | 301.026 | 72.1; 44.1      | 101 | 10 | 21/65 | 10/8  |
| 5-HYDROXY DMT (55206-22-9)                    | 205.058 | 58.1;<br>160.1  | 81  | 10 | 17/25  | 8/20  | NORKETAMINE (79499-59-5)         | 224.176 | 125.1;<br>207.2 | 51  | 10 | 13/21 | 12/12 |
| 5-IT (3784-30-3)                              | 175.275 | 158.1;<br>130.1 | 61  | 10 | 13/31  | 18/18 | NORTRIPTYLIN (894-71-3)          | 264.066 | 91.1;<br>105.1  | 81  | 10 | 29/27 | 12/14 |
| 5-MAPB (1823925-53-6)                         | 190.252 | 159.1;<br>131.1 | 56  | 10 | 15/29  | 16/20 | N-PROPYLAMPHETAMINE (59877-57-5) | 178.103 | 119.1;<br>65.0  | 86  | 10 | 17/61 | 16/10 |
| 5-MAPDB (2748590-04-5)                        | 192.202 | 161.1;<br>133.1 | 56  | 10 | 17/31  | 18/14 | NRG-3 (2701928-05-2)             | 242.250 | 181.1;<br>180.1 | 81  | 10 | 35/53 | 8/16  |
| 5-MeO-ALPHA-ET (4765-10-0)                    | 219.295 | 160.1;<br>117.1 | 71  | 10 | 27/55  | 18/14 | α-CPP (41202-32-8)               | 197.229 | 154.1;<br>118.1 | 121 | 10 | 27/45 | 20/8  |
| 5-MeO-DALT (928822-98-4)                      | 271.063 | 110.1;<br>174.1 | 86  | 10 | 21/27  | 14/22 | OCTACAINE (93940-32-0)           | 235.279 | 100.1;<br>72.1  | 81  | 10 | 23/51 | 14/10 |
| 5-METHOXY AMT (1137-04-8)                     | 205.050 | 188.0;<br>147.1 | 56  | 10 | 15/27  | 24/20 | ORG-28611 (784138-08-5)          | 384.309 | 270.2;<br>174.0 | 71  | 10 | 25/47 | 12/22 |
| 5-METHOXY DiPT (4021-34-5)                    | 275.078 | 114.2;<br>174.1 | 91  | 10 | 21/29  | 14/22 | OXAZEPAM (604-75-1)              | 288.031 | 242.1;<br>269.9 | 91  | 10 | 31/21 | 12/12 |
| 5-METHOXY DMT (1019-45-0)                     | 219.968 | 58.1;<br>175.0  | 146 | 10 | 21/21  | 8/22  | OXYMORPHONE (76-41-5)            | 302.251 | 284.0;<br>227.1 | 151 | 10 | 25/37 | 14/12 |
| 5-METHOXY METHYLONE (2702151-27-5)            | 238.277 | 190.1;<br>147.1 | 96  | 10 | 21/37  | 24/16 | PARACETAMOL (103-90-2)           | 152.016 | 110.0;<br>65.0  | 81  | 10 | 21/39 | 14/10 |
| 5-METHOXY MiPT (96096-55-8)                   | 247.988 | 86.1;<br>87.1   | 156 | 10 | 19/19  | 10/10 | PAROXETINE (78246-49-8)          | 330.014 | 70.0; 44.1      | 111 | 10 | 49/71 | 10/8  |
| 6-APB (286834-84-2)                           | 176.049 | 159.1;<br>131.1 | 66  | 10 | 13/25  | 20/18 | PCEEA (1798021-89-2)             | 248.346 | 91.0; 90.1      | 56  | 10 | 45/13 | 12/12 |
| 6-APDB (1281872-58-9)                         | 178.157 | 161.0;<br>132.9 | 36  | 10 | 15/29  | 22/8  | PCMPA (1934-63-0)                | 248.342 | 91.0; 90.1      | 66  | 10 | 43/15 | 14/12 |
| 6-BROMO-MDMA (87913-26-6)                     | 272.170 | 240.9           | 86  | 10 | 19     | 12    | PCPr (1934-55-0)                 | 218.345 | 91.0;<br>159.1  | 46  | 10 | 39/15 | 6/22  |
|                                               | 274.156 | 242.8           | 76  | 10 | 19     | 12    | PENTEDRONE (879669-95-1)         | 192.062 | 91.0;<br>132.1  | 81  | 10 | 31/25 | 12/16 |
| 6-CHLORO-MDMA (319920-71-3)                   | 228.238 | 169.0;          | 61  | 10 | 29/53  | 12/12 | PENTEDRONE METABOLITE            | 194.308 | 176.1;          | 81  | 10 | 17/43 | 22/12 |

|                                                  |         |                 |     |    |        |       |                             |         |                 |      |     |         |         |
|--------------------------------------------------|---------|-----------------|-----|----|--------|-------|-----------------------------|---------|-----------------|------|-----|---------|---------|
|                                                  |         | 77.0            |     |    |        |       | (1422513-91-4)              |         | 91.0            |      |     |         |         |
| 6-EAPB (1823318-37-1)                            | 204.150 | 131.1;<br>159.1 | 56  | 10 | 29/17  | 16/8  | PENTYLONE (17763-01-8)      | 235.658 | 188.1;<br>218.1 | 136  | 10  | 25/19   | 24/10   |
| 6-IT (21005-63-0)                                | 175.258 | 158.1;<br>130.1 | 51  | 10 | 15/31  | 8/18  | PHENAZEPAM (51753-57-2)     | 350.845 | 206.0;<br>179.0 | 131  | 10  | 49/63   | 26/22   |
| 6-MAM (2784-73-8)                                | 328.010 | 165.0;43<br>.0  | 141 | 10 | 51/95  | 20/8  | PHENCYCLIDINE (956-90-1)    | 244.103 | 86.1; 91.0      | 56   | 10  | 17/43   | 12/12   |
| 6-MAPB (2731011-08-6)                            | 190.239 | 131.1;<br>91.0  | 71  | 10 | 27/43  | 10/10 | PHENOBARBITAL (50-06-6)     | 231.014 | 42.0;<br>188.0  | -100 | -10 | -10/-10 | -44/-14 |
| 7-AMINOCLONAZEPAM (4959-17-5)                    | 286.241 | 121.1;<br>222.1 | 111 | 10 | 39/33  | 14/26 | PHENTERMINE (1197-21-3)     | 150.067 | 91.0;<br>133.1  | 41   | 10  | 27/13   | 12/16   |
| 7-AMINODESMETHYLFLUNITRAZEPAM (894-76-8)         | 270.396 | 121.1;<br>77.0  | 146 | 10 | 37/75  | 14/10 | PHENYTOIN (57-41-0)         | 253.004 | 182.1;<br>104.1 | 116  | 10  | 25/45   | 24/12   |
| 7-AMINOFLUNITRAZEPAM (34084-50-9)                | 283.767 | 135.1;<br>77.1  | 121 | 10 | 37/87  | 18/12 | PRAVADOLINE (92623-83-1)    | 379.060 | 135.1;<br>77.1  | 76   | 10  | 23/89   | 14/12   |
| 7-AMINONITRAZEPAM (4928-02-3)                    | 252.005 | 121.1;<br>77.1  | 111 | 10 | 35/73  | 16/10 | PRAZEPAM (2955-38-6)        | 325.365 | 271.0;<br>140.0 | 126  | 10  | 31/49   | 12/18   |
| 7-APB (286834-86-4)                              | 176.239 | 131.1;<br>77.0  | 46  | 10 | 25/53  | 14/10 | PREGABALIN (148553-50-8)    | 160.078 | 142.1;<br>55.0  | 116  | 10  | 15/29   | 18/8    |
| 7-APDB (1337821-68-7)                            | 178.233 | 161.1;<br>133.1 | 61  | 10 | 15/25  | 10/18 | PROCAINE (51-05-8)          | 237.063 | 100.1;<br>120.1 | 81   | 10  | 21/37   | 12/14   |
| A-834735 (895155-57-4)                           | 340.308 | 125.1;<br>55.0  | 156 | 10 | 29/61  | 16/10 | PROLINTANE (1211-28-5)      | 218.162 | 91.1; 72.1      | 86   | 10  | 33/23   | 12/10   |
| A-836339 (959746-77-1)                           | 311.150 | 187.1;<br>125.2 | 101 | 10 | 23/33  | 12/10 | PROMETHAZINE (58-33-3)      | 285.029 | 86.1; 71.1      | 76   | 10  | 21/63   | 12/10   |
| AB-FUBINACA (1185282-01-2)                       | 369.130 | 352.0;<br>109.1 | 81  | 10 | 13/47  | 14/14 | PROPAFENONE (34183-22-7)    | 342.045 | 116.1;<br>72.1  | 86   | 10  | 29/47   | 14/10   |
| AB-FUBINACA 2-FLUOROBENZYL ISOMER (1185282-16-9) | 369.269 | 253.0;<br>324.2 | 86  | 10 | 33/19  | 12/14 | PROPRANOLOL (318-98-9)      | 260.069 | 56.0; 58.1      | 86   | 10  | 45/45   | 8/10    |
| AB-FUBINACA 3-FLUOROBENZYL ISOMER (185282-19-2)  | 369.241 | 253.0;<br>324.1 | 66  | 10 | 35/21  | 12/14 | PROPYLHEXEDRINE (1007-33-6) | 155.882 | 69.1; 55.0      | 81   | 10  | 23/37   | 10/8    |
| ADB-PINACA ISOMER_1                              | 345.335 | 215.1;<br>300.2 | 86  | 10 | 33/21  | 10/14 | PSB-SB-1202 (1399049-60-5)  | 367.248 | 259.1;<br>121.1 | 121  | 10  | 23/23   | 12/8    |
| ADB-PINACA ISOMER_2                              | 345.304 | 215.1;<br>300.1 | 71  | 10 | 35/19  | 10/14 | PTI-1 (1400742-46-2)        | 356.299 | 283.0;<br>213.1 | 106  | 10  | 29/47   | 14/10   |
| ADB-PINACA ISOMER_3                              | 345.292 | 215.1;<br>300.2 | 71  | 10 | 33/19  | 10/14 | PTI-2 (1400742-45-1)        | 400.341 | 283.0;<br>213.1 | 116  | 10  | 31/51   | 14/10   |
| ADB-PINACA ISOMER_4                              | 345.305 | 215.1;<br>300.1 | 81  | 10 | 33/19  | 10/14 | PV-8 (13415-55-9)           | 260.116 | 91.1; 77.1      | 96   | 10  | 33/73   | 12/10   |
| AH-7921 (55154-30-8)                             | 329.174 | 284.0;<br>173.0 | 91  | 10 | 23/35  | 12/18 | PV9 (2749897-19-4)          | 274.307 | 91.0; 77.0      | 126  | 10  | 33/73   | 12/12   |
| AKB48_N-(4-FLUOROBENZYL)_ANALOG (2180933-90-6)   | 404.265 | 135.1;<br>77.0  | 136 | 10 | 29/121 | 16/14 | PX-2 (2365471-47-0)         | 397.253 | 233.0;<br>352.2 | 86   | 10  | 33/21   | 12/14   |
| ALFA-ETHYLAMINOPENTIOPHENONE (18268-16-1)        | 206.323 | 188.1;<br>91.0  | 86  | 10 | 17/39  | 22/12 | PYRAZOLAM (39243-02-2)      | 353.943 | 167.1;<br>206.0 | 151  | 10  | 47/41   | 20/26   |
| ALFA-PROPYLAMINOPENTIOPHENONE (18268-15-0)       | 220.315 | 202.1;<br>91.1  | 91  | 10 | 19/33  | 10/10 | QUETIAPINE (111974-72-2)    | 384.090 | 253.1;<br>221.0 | 116  | 10  | 31/51   | 12/28   |

|                                                |         |                 |     |    |        |       |                            |         |                 |     |    |        |       |
|------------------------------------------------|---------|-----------------|-----|----|--------|-------|----------------------------|---------|-----------------|-----|----|--------|-------|
| ALLYLESCALINE (39201-76-8)                     | 238.321 | 221.1;<br>77.0  | 51  | 10 | 13/67  | 10/12 | RH-34 (1028307-48-3)       | 326.300 | 121.1;<br>91.1  | 91  | 10 | 25/57  | 14/10 |
| ALPHA-DIMETHYLAMINOPENTIPHENONE (2168229-67-0) | 206.291 | 91.1;<br>77.1   | 101 | 10 | 27/57  | 14/12 | R-MMC (1246816-2-5)        | 236.144 | 188.2;218.1     | 61  | 10 | 25/17  | 10/18 |
| ALPHA-ETHYLAMINOHEXANOPHENONE (18410-62-3)     | 220.312 | 91.0;<br>130.1  | 106 | 10 | 33/47  | 12/14 | SCOPOLAMINE (114-49-8)     | 303.805 | 138.1;<br>156.1 | 96  | 10 | 29/23  | 18/20 |
| ALPHA-ETHYLTRYPTAMINE (2235-90-7)              | 188.767 | 130.1;<br>172.1 | 76  | 10 | 27.1is | 16/20 | SDB-005 (2180934-13-6)     | 359.177 | 215.2;<br>145.0 | 51  | 10 | 21/45  | 10/20 |
| ALPHA-HYDROXYMIDAZOLAM (59468-90-5)            | 341.989 | 324.0;<br>203.0 | 121 | 10 | 29/37  | 14/26 | SDB-006 (695213-59-3)      | 321.153 | 91.0;<br>214.1  | 171 | 10 | 61/39  | 12/10 |
| ALPHA-METHYLTRYPTAMINE (299-26-3)              | 175.029 | 158.1;<br>143.1 | 56  | 10 | 15/35  | 20/16 | SERTRALINE (79559-97-0)    | 306.988 | 276.0;<br>159.0 | 66  | 10 | 17/37  | 12/20 |
| ALPHA-PHP (13415-59-3)                         | 246.318 | 91.0;<br>77.0   | 76  | 10 | 33/65  | 10/10 | SILDENAFIL (139755-83-2)   | 475.047 | 58.1;100.1      | 91  | 10 | 103/35 | 10/12 |
| ALPHA-PHTALIMIDOPROPIOPHENONE (19437-20-8)     | 280.193 | 105.1;<br>77.0  | 116 | 10 | 31/79  | 14/12 | STANOZOLOL (10418-03-8)    | 329.138 | 81.1; 95.1      | 241 | 10 | 79/51  | 12/12 |
| ALPHA-PIBP (92728-82-0)                        | 232.294 | 91.1;<br>77.0   | 106 | 10 | 33/61  | 8/10  | TAPENTADOL (175591-09-0)   | 222.343 | 107.1;<br>77.0  | 86  | 10 | 35/63  | 14/12 |
| ALPHA-PPP (92040-10-3)                         | 204.261 | 105.1;<br>98.1  | 71  | 10 | 31/33  | 14/8  | TEMAZEPAM (846-50-4)       | 301.993 | 256.0;<br>284.1 | 116 | 10 | 31/19  | 12/12 |
| ALPHA-PVP (5485-65-4)                          | 232.243 | 91.1;<br>126.1  | 71  | 10 | 39/57  | 8/6   | TETRACAINE (92-24-6)       | 265.226 | 176.1;<br>72.0  | 96  | 10 | 21/37  | 18/10 |
| ALPHA-PVT (2748622-52-6)                       | 238.017 | 126.2;<br>97.0  | 91  | 10 | 29/31  | 16/12 | THIOPROPAMINE (53632-92-1) | 142.098 | 125.0;<br>97.0  | 51  | 10 | 13/25  | 8/12  |
| ALPHA-PYRROLIDINOBUTHIOPHENONE (13415-54-8)    | 224.190 | 112.2;<br>97.0  | 81  | 10 | 29/39  | 12/12 | THJ (2180931-94-4)         | 359.247 | 215.2;145.0     | 121 | 10 | 29/49  | 10/16 |
| ALPRAZOLAM (28981-97-7)                        | 309.934 | 282.0;<br>206.0 | 171 | 10 | 37/57  | 12/26 | TILETAMINE (14176-50-2)    | 224.246 | 179.0;<br>151.1 | 51  | 10 | 13/23  | 10/18 |
| AM1220 (137642-54-7)                           | 383.315 | 98.0;<br>112.1  | 101 | 10 | 49/27  | 14/12 | TRAMADOL (36282-47-2)      | 264.304 | 58.1; 42.1      | 96  | 10 | 47/113 | 8/8   |
| AM2201 8-QUINOLINYL CARBOXAMIDE (2365471-42-5) | 376.237 | 232.1;<br>144.1 | 86  | 10 | 23/55  | 12/16 | TRAZODONE (25332-39-2)     | 372.082 | 176.0;<br>148.0 | 126 | 10 | 33/45  | 24/20 |
| AM2201 BENZIMIDAZOLE ANALOG (1984789-90-3)     | 361.184 | 127.1;<br>155.1 | 131 | 10 | 73/41  | 16/20 | TRIAZOLAM (28911-01-5)     | 343.990 | 309.1;<br>239.9 | 106 | 10 | 37/57  | 14/30 |
| AM2232 (335161-19-8)                           | 353.245 | 155.1;<br>127.0 | 131 | 10 | 31/63  | 18/14 | TRIMIPRAMINE (521-78-8)    | 294.788 | 100.2;<br>58.1  | 81  | 10 | 23/61  | 12/8  |
| AMITRIPTYLINE (549-18-8)                       | 278.073 | 91.0;<br>105.1  | 101 | 10 | 33/31  | 12/14 | U-47700 (82657-23-6)       | 329.037 | 284.0           | 56  | 10 | 25     | 14    |
| AMPHETAMINE (2706-50-5)                        | 136.030 | 91.0;<br>119.1  | 51  | 10 | 23/11  | 12/16 |                            | 331.017 | 286.0           | 96  | 10 | 25     | 14    |
| ATENOLOL (29122-68-7)                          | 267.122 | 145.1;<br>56.1  | 101 | 10 | 35/43  | 20/8  | W-15 (93100-99-3)          | 377.154 | 105.1           | 141 | 10 | 33     | 16    |
| ATRAZYNA (1912-24-9)                           | 216.245 | 174.0;<br>104.0 | 126 | 10 | 23/39  | 24/14 |                            | 379.165 | 105.2           | 166 | 10 | 33     | 12    |
| AZACYCLONOL (115-46-8)                         | 268.279 | 250.1;<br>91.0  | 81  | 10 | 17/51  | 20/14 | WIN 54,461 (166599-63-9)   | 457.176 | 135.1;<br>77.0  | 126 | 10 | 29/95  | 12/12 |
| BB-22 (1400742-42-8)                           | 385.123 | 240.1;          | 101 | 10 | 19/51  | 16/18 | WIN 55,212-2 (131543-23-2) | 427.117 | 155.1;27.2      | 161 | 10 | 33/75  | 18/12 |

|                             |         |                 |     |    |       |       |                             |         |                 |     |    |       |       |
|-----------------------------|---------|-----------------|-----|----|-------|-------|-----------------------------|---------|-----------------|-----|----|-------|-------|
|                             |         | 144.0           |     |    |       |       |                             |         |                 |     |    |       |       |
| BDB (42542-07-4)            | 194.030 | 135.0;<br>177.0 | 56  | 10 | 25/11 | 18/24 | XLR12 (895155-78-9)         | 352.216 | 125.1;<br>254.0 | 141 | 10 | 31/35 | 8/12  |
| BENOCYCLIDINE (112726-66-6) | 300.293 | 215.1;<br>147.0 | 66  | 10 | 17/39 | 10/18 | YANGONIN (500-62-9)         | 259.148 | 161.0;<br>89.0  | 121 | 10 | 29/93 | 22/10 |
| BENZEDRONE (1797979-43-1)   | 254.273 | 91.1;<br>65.1   | 111 | 10 | 31/77 | 12/10 | ZALEPLON (151319-34-5)      | 305.911 | 264.0;<br>236.1 | 141 | 10 | 31/37 | 12/10 |
| BENZOCAINE (94-09-7)        | 166.030 | 120.0;<br>94.0  | 71  | 10 | 25/23 | 16/12 | ZOLPIDEM (82626-48-0)       | 308.323 | 235.1;<br>236.0 | 111 | 10 | 47/37 | 10/30 |
| BENZOYLECGONINE (519-09-5)  | 290.034 | 168.1;<br>77.0  | 91  | 10 | 27/77 | 20/10 | ZOPICLONE (43200-80-2)      | 389.014 | 244.9;112.<br>0 | 81  | 10 | 23/79 | 12/16 |
| BENZYDAMINE (642-72-8)      | 310.213 | 86.1;<br>58.1   | 106 | 10 | 23/71 | 10/10 | ZUCLOPENTHIXOL (53772-83-1) | 401.024 | 221.0;<br>231.0 | 101 | 10 | 73/49 | 26/28 |

Table S2. The results of concentration, precision, BIAS, and limit of detection (LOD) and quantification (LOQ) for validated compounds (where: C – concentration; R<sub>av</sub> - Average recovery; RA - Range analysis)

| Analyte (CAS numer)                                             | C (ng mL <sup>-1</sup> ) | t <sub>R</sub> (min) | R <sub>av</sub> (%) | CV (%) | BIAS (%) | RA (ng mL <sup>-1</sup> ) | LOD (ng mL <sup>-1</sup> ) | LOQ (ng mL <sup>-1</sup> ) | Analyte (CAS numer)         | C (ng mL <sup>-1</sup> ) | t <sub>R</sub> (min) | R <sub>av</sub> (%) | CV (%) | BIAS (%) | RA (ng mL <sup>-1</sup> ) | LOD (ng mL <sup>-1</sup> ) | LOQ (ng mL <sup>-1</sup> ) |
|-----------------------------------------------------------------|--------------------------|----------------------|---------------------|--------|----------|---------------------------|----------------------------|----------------------------|-----------------------------|--------------------------|----------------------|---------------------|--------|----------|---------------------------|----------------------------|----------------------------|
| 1-(2-METHOXYPHENYL)PIPERAZINE (38869-49-7)                      | 10                       | 5.34                 | 119.9               | 4.39   | 19.9     | 10-100                    | 3                          | 10                         | AMITRIPTYLINE (549-18-8)    | 100                      | 10.93                | 98.64               | 4.23   | -1.36    | 100-5000                  | 0.5                        | 100                        |
|                                                                 | 100                      |                      | 102.0               | 14.1   | 2.03     |                           |                            |                            |                             | 1000                     |                      | 108.5               | 5.53   | 8.51     |                           |                            |                            |
|                                                                 | 1000                     |                      | 52.73               | 6.37   | -47.3    |                           |                            |                            |                             | 5000                     |                      | 106.0               | 3.28   | 6.03     |                           |                            |                            |
|                                                                 | 2000                     |                      | 48.49               | 6.68   | -51.5    |                           |                            |                            |                             | 100                      |                      | 98.95               | 15.1   | -1.05    |                           |                            |                            |
|                                                                 | 5000                     |                      | 60.06               | 5.68   | -39.9    |                           |                            |                            |                             | 1000                     |                      | 83.17               | 11.7   | -16.8    |                           |                            |                            |
| 1-(3-TRIFLUOROMETHYLPHENYL)PIPERAZINE (TFMPP) (1605-69-3)       | 100                      | 7.99                 | 108.8               | 11.6   | 8.80     | 100-5000                  | 30                         | 100                        | AMPHETAMINE (2706-50-5)     | 5000                     | 90.43                | 10.9                | -9.57  | 100-5000 | 30                        | 100                        |                            |
|                                                                 | 1000                     |                      | 107.6               | 3.39   | 7.61     |                           |                            |                            |                             | 100                      | 106.2                | 6.69                | 6.15   |          |                           |                            |                            |
|                                                                 | 5000                     |                      | 105.0               | 8.67   | 5.00     |                           |                            |                            |                             | 5000                     | 104.2                | 5.83                | 4.15   |          |                           |                            |                            |
| 1-(4-CHLOROPHENYL)PIPERAZINE (pCPP) (38212-33-8)                | 100                      | 6.79                 | 96.84               | 14.8   | -3.16    | 100-5000                  | 30                         | 100                        | ATENOLOL (29122-68-7)       | 1000                     | 106.2                | 6.69                | 6.15   | 100-5000 | 0.5                       | 100                        |                            |
|                                                                 | 1000                     |                      | 92.65               | 7.70   | -7.35    |                           |                            |                            |                             | 5000                     | 92.26                | 6.26                | -7.74  |          |                           |                            |                            |
|                                                                 | 5000                     |                      | 108.7               | 8.18   | 8.74     |                           |                            |                            |                             | 10                       | 100.4                | 13.3                | 0.37   |          |                           |                            |                            |
| 1-(4-FLUOROPHENYL)PIPERAZINE (64090-19-3)                       | 100                      | 4.74                 | 93.23               | 2.42   | -6.77    | 100-5000                  | 30                         | 100                        | AZACYCLONOL (115-46-8)      | 100                      | 115.1                | 7.26                | 15.1   | 10-5000  | 0.5                       | 10                         |                            |
|                                                                 | 1000                     |                      | 97.85               | 7.74   | -2.15    |                           |                            |                            |                             | 1000                     | 115.0                | 1.54                | 15.0   |          |                           |                            |                            |
|                                                                 | 5000                     |                      | 103.7               | 2.87   | 3.74     |                           |                            |                            |                             | 2000                     | 108.2                | 6.59                | 8.17   |          |                           |                            |                            |
| 1,4-DIBENZYLPIPERAZINE (2289-55-7)                              | 100                      | 7.83                 | 106.2               | 7.31   | 6.18     | 100-5000                  | 30                         | 100                        | BB-22 (1400742-42-8)        | 5000                     | 99.82                | 2.60                | -0.18  | 10-1000  | 3                         | 10                         |                            |
|                                                                 | 1000                     |                      | 107.4               | 6.49   | 7.41     |                           |                            |                            |                             | 100                      | 86.48                | 15.4                | -13.5  |          |                           |                            |                            |
|                                                                 | 5000                     |                      | 110.9               | 3.75   | 10.9     |                           |                            |                            |                             | 1000                     | 110.6                | 10.4                | 10.6   |          |                           |                            |                            |
| 1-AMINOINDAN (34698-41-4)                                       | 100                      | 4.12                 | 112.0               | 5.24   | 12.0     | 100-5000                  | 30                         | 100                        | BDB (42542-07-4)            | 100                      | 110.6                | 12.3                | 10.6   | 100-5000 | 30                        | 100                        |                            |
|                                                                 | 1000                     |                      | 107.3               | 1.98   | 7.31     |                           |                            |                            |                             | 1000                     | 111.4                | 6.19                | 11.4   |          |                           |                            |                            |
|                                                                 | 5000                     |                      | 97.14               | 10.5   | -2.86    |                           |                            |                            |                             | 5000                     | 99.73                | 4.21                | -0.27  |          |                           |                            |                            |
| 1-METHYL-4-BENZYLPIPERAZINE (374898-00-7)                       | 100                      | 3.30                 | 91.13               | 6.37   | -8.87    | 100-5000                  | 30                         | 100                        | BENOCYCLIDINE (112726-66-6) | 10                       | 98.09                | 7.77                | -1.92  | 10-5000  | 3                         | 10                         |                            |
|                                                                 | 1000                     |                      | 82.95               | 3.70   | -17.1    |                           |                            |                            |                             | 100                      | 101.5                | 8.04                | 1.48   |          |                           |                            |                            |
|                                                                 | 5000                     |                      | 80.51               | 3.92   | -19.5    |                           |                            |                            |                             | 1000                     | 108.0                | 4.80                | 7.95   |          |                           |                            |                            |
| 1-METHYLAMINO-1-(3,4-METHYLENEDIOXYPHENYL)PROPANE (127292-43-7) | 10                       | 6.07                 | 93.73               | 13.1   | -6.27    | 10-5000                   | 3                          | 10                         | BENZEDRONE (1797979-43-1)   | 2000                     | 97.98                | 6.24                | -2.02  | 10-5000  | 3                         | 10                         |                            |
|                                                                 | 100                      |                      | 92.45               | 10.5   | -7.55    |                           |                            |                            |                             | 5000                     | 97.75                | 6.30                | -2.25  |          |                           |                            |                            |
|                                                                 | 1000                     |                      | 116.7               | 6.57   | 16.7     |                           |                            |                            |                             | 10                       | 83.91                | 16.2                | -16.1  |          |                           |                            |                            |
|                                                                 | 2000                     |                      | 106.1               | 3.11   | 6.05     |                           |                            |                            |                             | 100                      | 113.8                | 2.83                | 13.8   |          |                           |                            |                            |
|                                                                 | 5000                     |                      | 116.9               | 4.03   | 16.9     |                           |                            |                            |                             | 1000                     | 114.5                | 2.89                | 14.5   |          |                           |                            |                            |
| 2,3-DICHLOROPHENYLPIPERAZINE (DCPP) (119532-26-2)               | 100                      | 8.58                 | 114.8               | 18.7   | 14.8     | 100-5000                  | 30                         | 100                        |                             | 2000                     | 115.9                | 2.18                | 15.9   | 10-5000  | 3                         | 10                         |                            |
|                                                                 | 1000                     |                      | 115.1               | 6.67   | 15.1     |                           |                            |                            |                             | 5000                     | 102.2                | 4.50                | 2.15   |          |                           |                            |                            |

| Analyte (CAS numer)                                 | C<br>(ng mL <sup>-1</sup> ) | t <sub>R</sub><br>(min) | R <sub>av</sub><br>(%) | CV<br>(%) | BIAS<br>(%) | RA<br>(ng mL <sup>-1</sup> ) | LOD<br>(ng mL <sup>-1</sup> ) | LOQ<br>(ng mL <sup>-1</sup> ) | Analyte (CAS numer)             | C<br>(ng mL <sup>-1</sup> ) | t <sub>R</sub><br>(min) | R <sub>av</sub><br>(%) | CV<br>(%) | BIAS<br>(%) | RA<br>(ng mL <sup>-1</sup> ) | LOD<br>(ng mL <sup>-1</sup> ) | LOQ<br>(ng mL <sup>-1</sup> ) |
|-----------------------------------------------------|-----------------------------|-------------------------|------------------------|-----------|-------------|------------------------------|-------------------------------|-------------------------------|---------------------------------|-----------------------------|-------------------------|------------------------|-----------|-------------|------------------------------|-------------------------------|-------------------------------|
| 2,3-DIMETHYLETHCATHINONE (2,3-DMEC) (2705531-06-0)  | 5000                        | 7.52                    | 85.69                  | 6.80      | -14.3       | 100-5000                     | 30                            | 100                           | BENZOCAINE (94-09-7)            | 100                         | 8.95                    | 101.1                  | 3.38      | 1.05        | 100-5000                     | 30                            | 100                           |
|                                                     | 100                         |                         | 106.0                  | 5.28      | 5.95        |                              |                               |                               |                                 | 1000                        |                         | 114.8                  | 6.60      | 14.8        |                              |                               |                               |
|                                                     | 1000                        |                         | 117.2                  | 6.21      | 17.2        |                              |                               |                               |                                 | 5000                        |                         | 98.12                  | 4.28      | -1.88       |                              |                               |                               |
|                                                     | 5000                        |                         | 105.3                  | 2.37      | 5.26        |                              |                               |                               |                                 | 100                         |                         | 105.5                  | 10.34     | 5.46        |                              |                               |                               |
| 2,3-DIMETHYLMETHCATHINONE (2,3-DMMC) (1797981-99-7) | 100                         | 7.08                    | 103.1                  | 5.28      | 3.10        | 100-5000                     | 30                            | 100                           | BENZOYLECGONINE (519-09-5)      | 1000                        | 6.71                    | 88.48                  | 6.78      | -11.5       | 100-5000                     | 30                            | 100                           |
|                                                     | 1000                        |                         | -                      |           |             |                              |                               |                               |                                 | 5000                        |                         | 105.9                  | 2.82      | 5.89        |                              |                               |                               |
|                                                     | 5000                        |                         | 99.52                  | 8.09      | 0.480       |                              |                               |                               |                                 | 100                         |                         | 108.1                  | 6.18      | 8.14        |                              |                               |                               |
| 2,3-ETHYLONE ISOMER (2749504-06-9)                  | 10                          | 5.47                    | 106.8                  | 11.3      | 6.83        | 10-5000                      | 3                             | 10                            | BENZYLAMINE (642-72-8)          | 1000                        | 10.29                   | 111.0                  | 4.18      | 11.0        | 100-5000                     | 30                            | 100                           |
|                                                     | 100                         |                         | 118.5                  | 1.56      | 18.5        |                              |                               |                               |                                 | 5000                        |                         | 102.2                  | 2.61      | 2.18        |                              |                               |                               |
|                                                     | 1000                        |                         | 79.04                  | 1.53      | -21.0       |                              |                               |                               |                                 | 100                         |                         | 113.7                  | 14.7      | 13.7        |                              |                               |                               |
|                                                     | 2000                        |                         | 72.26                  | 5.20      | -27.7       |                              |                               |                               |                                 | 1000                        |                         | 103.5                  | 14.5      | 3.45        |                              |                               |                               |
|                                                     | 5000                        |                         | 85.22                  | 3.65      | -14.8       |                              |                               |                               |                                 | 5000                        |                         | 99.14                  | 7.83      | -0.860      |                              |                               |                               |
| 2,3-MDMA (168968-01-2)                              | 100                         | 5.79                    | 112.1                  | 11.3      | 12.1        | 100-5000                     | 30                            | 100                           | bk-2C-B (2303508-66-7)          | 10                          | 7.04                    | 112.7                  | 8.59      | 12.7        | 100-5000                     | 30                            | 100                           |
|                                                     | 1000                        |                         | 93.06                  | 9.09      | -6.94       |                              |                               |                               |                                 | 100                         |                         | 101.3                  | 8.67      | 1.31        |                              |                               |                               |
|                                                     | 5000                        |                         | 81.07                  | 5.19      | -18.9       |                              |                               |                               |                                 | 1000                        |                         | 44.41                  | 3.04      | -55.6       |                              |                               |                               |
| 2,3-MDPV (24622-62-6)                               | 10                          | 7.59                    | 81.31                  | 8.23      | -18.7       | 10-5000                      | 3                             | 10                            | bk-MDA (80535-73-5)             | 2000                        | 4.27                    | 33.89                  | 4.75      | -66.1       | 10-100                       | 3                             | 10                            |
|                                                     | 100                         |                         | 98.21                  | 4.46      | -1.79       |                              |                               |                               |                                 | 5000                        |                         | 37.22                  | 6.56      | -62.8       |                              |                               |                               |
|                                                     | 1000                        |                         | 98.53                  | 4.65      | -1.47       |                              |                               |                               |                                 | 10                          |                         | 100.3                  | 11.1      | 0.33        |                              |                               |                               |
|                                                     | 2000                        |                         | 98.08                  | 6.32      | -1.92       |                              |                               |                               |                                 | 100                         |                         | 113.9                  | 6.51      | 13.9        |                              |                               |                               |
|                                                     | 5000                        |                         | 90.21                  | 4.52      | -9.79       |                              |                               |                               |                                 | 1000                        |                         | 100.5                  | 3.88      | 0.51        |                              |                               |                               |
| 2,4,5-TRIMETHOXYAMPHETAMINE (15995-72-9)            | 10                          | 5.54                    | 87.01                  | 12.7      | -13.0       | 10-5000                      | 3                             | 10                            | BMPEA (20388-87-8)              | 2000                        | 4.88                    | 89.63                  | 3.24      | -10.4       | 10-5000                      | 3                             | 10                            |
|                                                     | 100                         |                         | 91.64                  | 10.4      | -8.36       |                              |                               |                               |                                 | 5000                        |                         | 81.84                  | 1.96      | -18.2       |                              |                               |                               |
|                                                     | 1000                        |                         | 112.2                  | 2.96      | 12.2        |                              |                               |                               |                                 | 10                          |                         | 96.19                  | 8.22      | -3.81       |                              |                               |                               |
|                                                     | 2000                        |                         | 88.03                  | 5.42      | -12.0       |                              |                               |                               |                                 | 100                         |                         | 105.3                  | 8.65      | 5.29        |                              |                               |                               |
|                                                     | 5000                        |                         | 80.73                  | 2.18      | -19.3       |                              |                               |                               |                                 | 1000                        |                         | 114.47                 | 6.09      | 14.5        |                              |                               |                               |
| 2,4-DIMETHYLMETHCATHINONE (2,4-DMMC) (2412098-39-4) | 100                         | 7.53                    | 112.9                  | 3.70      | 12.9        | 100-5000                     | 30                            | 100                           | BROMO-DRAGON-FLY (219986-78-4)  | 2000                        | 10.05                   | 107.4                  | 2.43      | 7.41        | 10-5000                      | 3                             | 10                            |
|                                                     | 1000                        |                         | 109.7                  | 13.0      | 9.74        |                              |                               |                               |                                 | 5000                        |                         | 100.1                  | 4.79      | 0.08        |                              |                               |                               |
|                                                     | 5000                        |                         | 115.6                  | 4.95      | 15.6        |                              |                               |                               |                                 | 10                          |                         | 105.7                  | 6.31      | 5.66        |                              |                               |                               |
|                                                     | 10                          |                         | 83.20                  | 18.3      | -16.8       |                              |                               |                               |                                 | 100                         |                         | 105.7                  | 13.1      | 5.73        |                              |                               |                               |
| 2,4-DMEC (2702352-15-4)                             | 100                         | 8.3                     | 108.6                  | 6.17      | 8.59        | 10-5000                      | 3                             | 10                            | BUPRENORPHINE (53152-21-9)      | 1000                        | 9.64                    | 104.7                  | 7.01      | 4.70        | 10-5000                      | 3                             | 10                            |
|                                                     | 1000                        |                         | 99.83                  | 5.64      | -0.17       |                              |                               |                               |                                 | 2000                        |                         | 93.86                  | 4.61      | -6.14       |                              |                               |                               |
|                                                     | 2000                        |                         | 104.0                  | 12.5      | 4.00        |                              |                               |                               |                                 | 5000                        |                         | 88.99                  | 4.70      | -11.0       |                              |                               |                               |
|                                                     | 5000                        |                         | 94.67                  | 11.5      | -5.33       |                              |                               |                               |                                 | 100                         |                         | 106.5                  | 4.96      | 6.54        |                              |                               |                               |
|                                                     | 10                          |                         | 86.04                  | 11.6      | -14.0       |                              |                               |                               |                                 | 1000                        |                         | 114.5                  | 4.02      | 14.5        |                              |                               |                               |
| 2,5-DMMA (54687-43-3)                               | 100                         | 6.73                    | 94.94                  | 6.06      | -5.06       | 10-5000                      | 3                             | 10                            | BUPROPION (31677-93-7)          | 5000                        | 8.09                    | 109.4                  | 2.10      | 9.42        | 100-5000                     | 30                            | 100                           |
|                                                     | 1000                        |                         | 92.75                  | 6.45      | -7.25       |                              |                               |                               |                                 | 100                         |                         | 115.8                  | 5.86      | 15.8        |                              |                               |                               |
|                                                     | 1000                        |                         | 92.75                  | 6.45      | -7.25       |                              |                               |                               |                                 | 1000                        |                         | 105.4                  | 11.5      | 5.38        |                              |                               |                               |
|                                                     | 2000                        |                         | 87.73                  | 4.67      | -12.3       |                              |                               |                               |                                 | 1000                        |                         | 105.4                  | 11.5      | 5.38        |                              |                               |                               |
|                                                     |                             |                         |                        |           |             |                              |                               |                               | BUTYLONE (bk-MBDB) (17763-12-1) |                             |                         |                        |           |             |                              |                               |                               |

| Analyte (CAS numer)       | C<br>(ng mL <sup>-1</sup> ) | t <sub>R</sub><br>(min) | R <sub>av</sub><br>(%) | CV<br>(%) | BIAS<br>(%) | RA<br>(ng mL <sup>-1</sup> ) | LOD<br>(ng mL <sup>-1</sup> ) | LOQ<br>(ng mL <sup>-1</sup> ) | Analyte (CAS numer)         | C<br>(ng mL <sup>-1</sup> ) | t <sub>R</sub><br>(min) | R <sub>av</sub><br>(%) | CV<br>(%) | BIAS<br>(%) | RA<br>(ng mL <sup>-1</sup> ) | LOD<br>(ng mL <sup>-1</sup> ) | LOQ<br>(ng mL <sup>-1</sup> ) |
|---------------------------|-----------------------------|-------------------------|------------------------|-----------|-------------|------------------------------|-------------------------------|-------------------------------|-----------------------------|-----------------------------|-------------------------|------------------------|-----------|-------------|------------------------------|-------------------------------|-------------------------------|
| 25B-NBF (1539266-17-5)    | 5000                        | 10.16                   | 83.93                  | 4.49      | -16.1       | 10-5000                      | 3                             | 10                            | CAMFETAMINE<br>(92499-19-9) | 5000                        | 8.23                    | 92.96                  | 9.04      | -7.04       | 10-5000                      | 3                             | 10                            |
|                           | 10                          |                         | 95.48                  | 7.30      | -4.52       |                              |                               |                               |                             | 10                          |                         | 104.5                  | 19.1      | 4.53        |                              |                               |                               |
|                           | 100                         |                         | 103.7                  | 8.19      | 3.74        |                              |                               |                               |                             | 100                         |                         | 104.5                  | 11.6      | 4.45        |                              |                               |                               |
|                           | 1000                        |                         | 108.3                  | 3.99      | 8.32        |                              |                               |                               |                             | 1000                        |                         | 111.9                  | 9.29      | 11.9        |                              |                               |                               |
|                           | 2000                        |                         | 103.2                  | 4.78      | 3.24        |                              |                               |                               |                             | 2000                        |                         | 105.9                  | 4.67      | 5.89        |                              |                               |                               |
| 5000                      | 90.45                       | 4.65                    | -9.55                  | 5000      | 101.3       | 15.2                         | 1.28                          |                               |                             |                             |                         |                        |           |             |                              |                               |                               |
| 25C-NBF (1539266-21-1)    | 10                          | 9.9                     | 21.43                  | 38.5      | -78.6       | 100-5000                     | 30                            | 100                           | CANNABIDIOL<br>(13956-29-1) | 10                          | 15.07                   | 85.00                  | 14.4      | -15.0       | 10-1000                      | 3                             | 10                            |
|                           | 100                         |                         | 117.6                  | 8.08      | 17.6        |                              |                               |                               |                             | 100                         |                         | 100.4                  | 14.8      | 0.36        |                              |                               |                               |
|                           | 1000                        |                         | 115.8                  | 2.02      | 15.8        |                              |                               |                               |                             | 1000                        |                         | 113.5                  | 2.39      | 13.5        |                              |                               |                               |
|                           | 2000                        |                         | 108.4                  | 4.94      | 8.40        |                              |                               |                               |                             | 2000                        |                         | 114.5                  | 2.67      | 14.5        |                              |                               |                               |
| 25C-NBOH (1539266-20-0)   | 5000                        | 9.79                    | 96.07                  | 4.18      | -3.93       | 100-5000                     | 30                            | 100                           | CARBAMAZEPINE<br>(298-46-4) | 1000                        | 10.57                   | 119.5                  | 5.29      | 19.5        | 100-5000                     | 30                            | 100                           |
|                           | 100                         |                         | 108.5                  | 3.93      | 8.48        |                              |                               |                               |                             | 5000                        |                         | 92.85                  | 3.74      | -7.15       |                              |                               |                               |
|                           | 1000                        |                         | 98.02                  | 2.95      | -1.98       |                              |                               |                               |                             | 100                         |                         | 96.88                  | 6.85      | -3.12       |                              |                               |                               |
| 25C-NBOMe (1539266-19-7)  | 5000                        | 10.33                   | 105.9                  | 5.38      | 5.92        | 100-5000                     | 30                            | 100                           | CATHINE (492-39-7)          | 1000                        | 3.68                    | 90.58                  | 6.42      | -9.42       | 100-5000                     | 30                            | 100                           |
|                           | 100                         |                         | 109.2                  | 6.39      | 9.24        |                              |                               |                               |                             | 5000                        |                         | 109.4                  | 5.61      | 9.41        |                              |                               |                               |
|                           | 1000                        |                         | 112.2                  | 4.26      | 12.2        |                              |                               |                               |                             | 100                         |                         | 102.3                  | 6.61      | 2.31        |                              |                               |                               |
| 25D-NBOMe (1539266-35-7)  | 5000                        | 10.52                   | 97.32                  | 4.23      | -2.68       | 100-5000                     | 30                            | 100                           | CATHINONE<br>(71031-15-7)   | 1000                        | 3.75                    | 105.6                  | 2.76      | 5.61        | 100-5000                     | 30                            | 100                           |
|                           | 100                         |                         | 117.8                  | 8.22      | 17.8        |                              |                               |                               |                             | 5000                        |                         | 96.55                  | 5.00      | -3.45       |                              |                               |                               |
|                           | 1000                        |                         | 115.5                  | 4.01      | 15.5        |                              |                               |                               |                             | 10                          |                         | 48.58                  | 13.5      | -51.4       |                              |                               |                               |
| 25E-NBOMe (1539266-39-1)  | 5000                        | 11.33                   | 93.89                  | 2.90      | -6.11       | 100-5000                     | 30                            | 100                           | CB-13 (432047-72-8)         | 100                         | 16.51                   | 23.41                  | 44.9      | -76.6       | -                            | 3                             | -                             |
|                           | 100                         |                         | 111.3                  | 4.42      | 11.3        |                              |                               |                               |                             | 1000                        |                         | 166.9                  | 4.63      | 66.9        |                              |                               |                               |
|                           | 1000                        |                         | 118.4                  | 3.86      | 18.4        |                              |                               |                               |                             | 10                          |                         | 13.76                  | 78.2      | -86.2       |                              |                               |                               |
| 25G-NBOMe (1797132-54-7)  | 5000                        | 11.05                   | 93.39                  | 2.98      | -6.61       | 100-5000                     | 30                            | 100                           | CBL-018<br>(2365471-54-9)   | 100                         | 15.82                   | 64.57                  | 18.0      | -35.4       | -                            | 3                             | -                             |
|                           | 10                          |                         | 85.40                  | 9.76      | -14.6       |                              |                               |                               |                             | 1000                        |                         | 166.6                  | 5.54      | 66.6        |                              |                               |                               |
|                           | 100                         |                         | 100.5                  | 4.49      | 0.53        |                              |                               |                               |                             | 10                          |                         | 29.91                  | 44.7      | -70.1       |                              |                               |                               |
|                           | 1000                        |                         | 106.6                  | 6.88      | 6.64        |                              |                               |                               |                             | 100                         |                         | 93.04                  | 13.0      | -6.96       |                              |                               |                               |
|                           | 2000                        |                         | 95.22                  | 3.94      | -4.78       |                              |                               |                               |                             | 1000                        |                         | 118.2                  | 2.33      | 18.2        |                              |                               |                               |
| 25H-NBOMe (1566571-52-5)  | 5000                        | 9.50                    | 78.31                  | 2.90      | -21.7       | 100-5000                     | 30                            | 100                           | CI2201 (1391486-12-6)       | 2000                        | 14.96                   | 115.4                  | 2.57      | 15.4        | 100-5000                     | 30                            | 100                           |
|                           | 100                         |                         | 113.8                  | 7.58      | 13.8        |                              |                               |                               |                             | 5000                        |                         | 115.0                  | 6.16      | 15.0        |                              |                               |                               |
|                           | 1000                        |                         | 117.6                  | 5.70      | 17.6        |                              |                               |                               |                             | 100                         |                         | 97.22                  | 10.7      | -2.78       |                              |                               |                               |
|                           | 5000                        |                         | 99.66                  | 5.70      | -0.34       |                              |                               |                               |                             | 1000                        |                         | 110.2                  | 8.63      | 10.2        |                              |                               |                               |
| 25I-NB2OMe (1943868-97-8) | 10                          | 10.89                   | 103.3                  | 8.89      | 3.28        | 10-5000                      | 3                             | 10                            | CLOBAZAM<br>(22316-47-8)    | 5000                        | 11.17                   | 110.2                  | 7.60      | 10.2        | 100-5000                     | 30                            | 100                           |
|                           | 100                         |                         | 103.6                  | 5.51      | 3.62        |                              |                               |                               |                             | 100                         |                         | 117.1                  | 4.83      | 17.1        |                              |                               |                               |
|                           | 1000                        |                         | 110.3                  | 4.13      | 10.3        |                              |                               |                               |                             | 1000                        |                         | 114.5                  | 7.56      | 14.5        |                              |                               |                               |
|                           | 2000                        |                         | 103.7                  | 2.35      | 3.65        |                              |                               |                               |                             | 5000                        |                         | 96.33                  | 4.30      | -3.67       |                              |                               |                               |
|                           | 5000                        |                         | 93.23                  | 4.42      | -6.77       |                              |                               |                               |                             | 100                         |                         | 90.50                  | 6.69      | -9.50       |                              |                               |                               |
| 25I-NB3OMe (1566571-40-1) | 10                          | 10.88                   | 102.9                  | 17.9      | 2.87        | 10-5000                      | 3                             | 10                            | CLONAZEPAM<br>(1622-61-3)   | 1000                        | 10.80                   | 119.1                  | 7.62      | 19.1        | 100-5000                     | 30                            | 100                           |

| Analyte (CAS numer)                 | C<br>(ng mL <sup>-1</sup> ) | t <sub>R</sub><br>(min) | R <sub>av</sub><br>(%) | CV<br>(%) | BIAS<br>(%) | RA<br>(ng mL <sup>-1</sup> ) | LOD<br>(ng mL <sup>-1</sup> ) | LOQ<br>(ng mL <sup>-1</sup> ) | Analyte (CAS numer)                        | C<br>(ng mL <sup>-1</sup> ) | t <sub>R</sub><br>(min) | R <sub>av</sub><br>(%) | CV<br>(%) | BIAS<br>(%) | RA<br>(ng mL <sup>-1</sup> ) | LOD<br>(ng mL <sup>-1</sup> ) | LOQ<br>(ng mL <sup>-1</sup> ) |
|-------------------------------------|-----------------------------|-------------------------|------------------------|-----------|-------------|------------------------------|-------------------------------|-------------------------------|--------------------------------------------|-----------------------------|-------------------------|------------------------|-----------|-------------|------------------------------|-------------------------------|-------------------------------|
|                                     | 100                         |                         | 109.2                  | 4.44      | 9.15        |                              |                               |                               | COCAETHYLENE<br>(529-38-4)                 | 5000                        | 8.16                    | 103.2                  | 6.12      | 3.21        | 100-5000                     | 30                            | 100                           |
|                                     | 1000                        |                         | 110.4                  | 5.05      | 10.4        |                              |                               |                               |                                            | 100                         |                         | 100.2                  | 3.87      | 0.190       |                              |                               |                               |
|                                     | 2000                        |                         | 102.9                  | 4.45      | 2.89        |                              |                               |                               |                                            | 1000                        |                         | 117.0                  | 4.39      | 17.0        |                              |                               |                               |
|                                     | 5000                        |                         | 96.93                  | 3.14      | -3.07       |                              |                               |                               |                                            | 5000                        |                         | 109.5                  | 8.13      | 9.47        |                              |                               |                               |
| 25I-NB4OMe (1566571-64-9)           | 10                          | 10.81                   | 113.1                  | 6.73      | 13.1        | 10-5000                      | 3                             | 10                            | COCAINE (50-36-2)                          | 100                         | 7.22                    | 108.7                  | 2.51      | 8.70        | 100-5000                     | 30                            | 100                           |
|                                     | 100                         |                         | 107.9                  | 4.15      | 7.92        |                              |                               |                               |                                            | 1000                        |                         | 114.3                  | 7.29      | 14.3        |                              |                               |                               |
|                                     | 1000                        |                         | 107.7                  | 2.75      | 7.67        |                              |                               |                               |                                            | 5000                        |                         | 106.2                  | 4.31      | 6.19        |                              |                               |                               |
|                                     | 2000                        |                         | 96.87                  | 5.34      | -3.13       |                              |                               |                               |                                            | 100                         |                         | 115.2                  | 8.09      | 15.2        |                              |                               |                               |
| 25I-NBF (1539266-13-1)              | 10                          | 10.60                   | 96.61                  | 12.0      | -3.39       | 10-5000                      | 3                             | 10                            | CODEINE (76-57-3)                          | 1000                        | 4.47                    | 85.49                  | 3.42      | -14.5       | 100-5000                     | 30                            | 100                           |
|                                     | 100                         |                         | 102.9                  | 6.83      | 2.89        |                              |                               |                               |                                            | 5000                        |                         | 85.97                  | 4.74      | -14.0       |                              |                               |                               |
|                                     | 1000                        |                         | 102.4                  | 4.63      | 2.35        |                              |                               |                               |                                            | 10                          |                         | 115.8                  | 6.91      | 15.8        |                              |                               |                               |
|                                     | 2000                        |                         | 96.11                  | 3.28      | -3.89       |                              |                               |                               |                                            | 100                         |                         | 99.62                  | 6.46      | -0.38       |                              |                               |                               |
| 25I-NBMD (1539266-14-2)             | 10                          | 10.72                   | 91.17                  | 3.58      | -8.83       | 10-5000                      | 3                             | 10                            | CUMYL-PICA<br>(1400742-32-6)               | 1000                        | 14.69                   | 97.18                  | 3.58      | -2.82       | 10-1000                      | 3                             | 10                            |
|                                     | 100                         |                         | 91.29                  | 12.1      | -8.71       |                              |                               |                               |                                            | 10                          |                         | 92.04                  | 9.47      | -7.96       |                              |                               |                               |
|                                     | 1000                        |                         | 114.3                  | 2.46      | 14.3        |                              |                               |                               |                                            | 100                         |                         | 110.0                  | 7.18      | 9.97        |                              |                               |                               |
|                                     | 2000                        |                         | 116.9                  | 3.82      | 16.9        |                              |                               |                               |                                            | 1000                        |                         | 116.2                  | 1.96      | 16.2        |                              |                               |                               |
| 25I-NBOH (1539266-12-0)             | 1000                        | 10.49                   | 111.1                  | 2.94      | 11.1        | 10-5000                      | 3                             | 10                            | D2PM (172152-19-1)                         | 2000                        | 7.97                    | 102.1                  | 10.1      | 2.07        | 10-5000                      | 3                             | 10                            |
|                                     | 5000                        |                         | 107.0                  | 2.69      | 7.04        |                              |                               |                               |                                            | 5000                        |                         | 101.8                  | 3.74      | 1.81        |                              |                               |                               |
|                                     | 100                         |                         | 107.5                  | 7.04      | 7.53        |                              |                               |                               |                                            | 100                         |                         | 100.9                  | 6.55      | 0.86        |                              |                               |                               |
|                                     | 1000                        |                         | 114.5                  | 5.90      | 14.5        |                              |                               |                               |                                            | 1000                        |                         | 116.3                  | 3.41      | 16.3        |                              |                               |                               |
| 25N-NBOMe (1566571-65-0)            | 5000                        | 9.15                    | 100.9                  | 5.62      | 0.880       | 100-5000                     | 30                            | 100                           | DEMOXEPAM<br>(963-39-3)                    | 5000                        | 10.27                   | 106.1                  | 3.67      | 6.05        | 100-5000                     | 30                            | 100                           |
|                                     | 100                         |                         | 111.4                  | 4.60      | 11.4        |                              |                               |                               |                                            | 100                         |                         | 80.14                  | 12.0      | -19.9       |                              |                               |                               |
|                                     | 1000                        |                         | 116.9                  | 4.19      | 16.9        |                              |                               |                               |                                            | 1000                        |                         | 114.3                  | 8.30      | 14.3        |                              |                               |                               |
| 25T2-NBOMe (1539266-51-7)           | 5000                        | 10.79                   | 97.82                  | 6.75      | -2.18       | 100-5000                     | 30                            | 100                           | DESALKYLFLURAZEPAM<br>(2886-65-9)          | 5000                        | 11.63                   | 93.57                  | 4.98      | -6.43       | 100-5000                     | 30                            | 100                           |
|                                     | 10                          |                         | 102.6                  | 7.01      | 2.56        |                              |                               |                               |                                            | 100                         |                         | 99.31                  | 10.9      | -0.69       |                              |                               |                               |
|                                     | 100                         |                         | 100.5                  | 5.06      | 0.52        |                              |                               |                               |                                            | 1000                        |                         | 115.4                  | 6.53      | 15.4        |                              |                               |                               |
|                                     | 1000                        |                         | 106.0                  | 3.75      | 6.04        |                              |                               |                               |                                            | 5000                        |                         | 112.7                  | 6.36      | 12.7        |                              |                               |                               |
| 25T-NBOMe (1539266-47-1)            | 2000                        | 10.14                   | 92.21                  | 5.54      | -7.79       | 10-2000                      | 3                             | 10                            | DESCHLOROETIZOLAM<br>(40054-73-7)          | 10                          | 11.53                   | 103.2                  | 10.5      | 3.20        | 10-5000                      | 3                             | 10                            |
|                                     | 5000                        |                         | 67.64                  | 1.36      | -32.4       |                              |                               |                               |                                            | 100                         |                         | 97.61                  | 9.87      | -2.39       |                              |                               |                               |
|                                     | 100                         |                         | 106.4                  | 5.11      | 6.43        |                              |                               |                               |                                            | 1000                        |                         | 84.23                  | 8.78      | -15.8       |                              |                               |                               |
|                                     | 1000                        |                         | 112.6                  | 6.59      | 12.6        |                              |                               |                               |                                            | 2000                        |                         | 86.79                  | 7.80      | -13.2       |                              |                               |                               |
| 2-AMINO-1-PHENYLBUTANE (20735-15-3) | 5000                        | 6.10                    | 102.6                  | 3.84      | 2.64        | 100-5000                     | 30                            | 100                           | DESCHLORO-N-ETHYL-<br>KETAMINE (4551-92-2) | 5000                        | 6.23                    | 86.65                  | 6.28      | -13.4       | 10-5000                      | 30                            | 100                           |
|                                     | 10                          |                         | 107.8                  | 9.65      | 7.75        |                              |                               |                               |                                            | 100                         |                         | 117.4                  | 8.93      | 17.4        |                              |                               |                               |
|                                     | 100                         |                         | 108.9                  | 6.56      | 8.92        |                              |                               |                               |                                            | 1000                        |                         | 116.1                  | 4.69      | 16.1        |                              |                               |                               |
|                                     | 1000                        |                         | 86.99                  | 5.03      | -13.0       |                              |                               |                               |                                            | 5000                        |                         | 93.31                  | 3.78      | -6.69       |                              |                               |                               |
| 2-AMINO-1-PHENYLBUTANE (20735-15-3) | 2000                        | 6.10                    | 82.47                  | 6.63      | -17.5       | 10-5000                      | 3                             | 10                            | DESIPRAMINE<br>(50-47-4)                   | 100                         | 10.75                   | 102.1                  | 11.0      | 2.06        | 100-5000                     | 30                            | 100                           |
|                                     | 5000                        |                         | 85.94                  | 4.59      | -14.1       |                              |                               |                               |                                            | 1000                        |                         | 119.0                  | 5.31      | 19.0        |                              |                               |                               |
|                                     | 1000                        |                         | 86.99                  | 5.03      | -13.0       |                              |                               |                               |                                            | 5000                        |                         | 103.6                  | 8.96      | 3.58        |                              |                               |                               |
|                                     | 2000                        |                         | 82.47                  | 6.63      | -17.5       |                              |                               |                               |                                            | 100                         |                         | 102.1                  | 11.0      | 2.06        |                              |                               |                               |
| 2-AMINO-1-PHENYLBUTANE (20735-15-3) | 5000                        | 6.10                    | 85.94                  | 4.59      | -14.1       | 10-5000                      | 3                             | 10                            | DESMETHYLDIAZEPAM (1088-11-5)              | 1000                        | 11.96                   | 119.0                  | 5.31      | 19.0        | 100-5000                     | 30                            | 100                           |
|                                     | 1000                        |                         | 82.47                  | 6.63      | -17.5       |                              |                               |                               |                                            | 1000                        |                         | 119.0                  | 5.31      | 19.0        |                              |                               |                               |
|                                     | 2000                        |                         | 82.47                  | 6.63      | -17.5       |                              |                               |                               |                                            | 5000                        |                         | 103.6                  | 8.96      | 3.58        |                              |                               |                               |
|                                     | 5000                        |                         | 85.94                  | 4.59      | -14.1       |                              |                               |                               |                                            | 1000                        |                         | 119.0                  | 5.31      | 19.0        |                              |                               |                               |



| Analyte (CAS numer)                 | C<br>(ng mL <sup>-1</sup> ) | t <sub>R</sub><br>(min) | R <sub>av</sub><br>(%) | CV<br>(%) | BIAS<br>(%) | RA<br>(ng mL <sup>-1</sup> ) | LOD<br>(ng mL <sup>-1</sup> ) | LOQ<br>(ng mL <sup>-1</sup> ) | Analyte (CAS numer)                | C<br>(ng mL <sup>-1</sup> ) | t <sub>R</sub><br>(min) | R <sub>av</sub><br>(%) | CV<br>(%) | BIAS<br>(%) | RA<br>(ng mL <sup>-1</sup> ) | LOD<br>(ng mL <sup>-1</sup> ) | LOQ<br>(ng mL <sup>-1</sup> ) |
|-------------------------------------|-----------------------------|-------------------------|------------------------|-----------|-------------|------------------------------|-------------------------------|-------------------------------|------------------------------------|-----------------------------|-------------------------|------------------------|-----------|-------------|------------------------------|-------------------------------|-------------------------------|
| 2-AMINOINDANE (2338-18-3)           | 100                         | 3.89                    | 109.0                  | 3.91      | 9.04        | 100-5000                     | 30                            | 100                           | DESMETHYLFLUNITRAZEPAM (2558-30-7) | 100                         | 10.38                   | 88.28                  | 7.70      | -11.7       | 100-5000                     | 30                            | 100                           |
|                                     | 1000                        |                         | 95.58                  | 4.00      | -4.42       |                              |                               |                               |                                    | 1000                        |                         | 119.3                  | 2.69      | 19.3        |                              |                               |                               |
|                                     | 5000                        |                         | 87.01                  | 4.24      | -13.0       |                              |                               |                               |                                    | 5000                        |                         | 117.2                  | 4.07      | 17.2        |                              |                               |                               |
| 2-BROMOAMPHETAMINE (861006-36-2)    | 10                          | 7.05                    | 29.96                  | 101       | -70.0       | 100-5000                     | 30                            | 100                           | DESOMORPHINE (427-00-9)            | 100                         | 5.22                    | 113.4                  | 9.50      | 13.4        | 100-5000                     | 30                            | 100                           |
|                                     | 100                         |                         | 96.46                  | 13.1      | -3.54       |                              |                               |                               |                                    | 1000                        |                         | 95.28                  | 4.11      | -4.72       |                              |                               |                               |
|                                     | 1000                        |                         | 98.05                  | 4.54      | -1.95       |                              |                               |                               |                                    | 5000                        |                         | 92.80                  | 7.15      | -7.20       |                              |                               |                               |
|                                     | 2000                        |                         | 91.30                  | 6.33      | -8.70       |                              |                               |                               |                                    | 10                          |                         | 91.80                  | 10.2      | -8.20       |                              |                               |                               |
|                                     | 5000                        |                         | 90.86                  | 5.09      | -9.14       |                              |                               |                               |                                    | 100                         |                         | 106.5                  | 8.11      | 6.49        |                              |                               |                               |
| 2-BROMOMETHAMPHETAMINE (23695-11-6) | 100                         | 7.21                    | 110.1                  | 8.04      | 10.1        | 100-5000                     | 30                            | 100                           | DESOXY-D2PM (188398-87-0)          | 100                         | 8.69                    | 99.68                  | 13.8      | -0.320      | 10-5000                      | 3                             | 10                            |
|                                     | 1000                        |                         | 111.1                  | 6.29      | 11.1        |                              |                               |                               |                                    | 1000                        |                         | 100.9                  | 7.53      | 0.880       |                              |                               |                               |
|                                     | 5000                        |                         | 86.42                  | 12.6      | -13.6       |                              |                               |                               |                                    | 5000                        |                         | 92.24                  | 3.36      | -7.76       |                              |                               |                               |
| 2C-B (56281-37-9)                   | 100                         | 7.75                    | 106.1                  | 4.88      | 6.11        | 100-5000                     | 30                            | 100                           | DESOXYPIPRADROL (5807-81-8)        | 100                         | 9.10                    | 113.1                  | 3.17      | 13.1        | 100-5000                     | 30                            | 100                           |
|                                     | 1000                        |                         | 118.8                  | 7.10      | 18.8        |                              |                               |                               |                                    | 1000                        |                         | 114.7                  | 6.12      | 14.7        |                              |                               |                               |
|                                     | 5000                        |                         | 104.7                  | 5.22      | 4.67        |                              |                               |                               |                                    | 5000                        |                         | 100.7                  | 5.51      | 0.740       |                              |                               |                               |
| 2C-B FLY (178557-21-6)              | 100                         | 8.06                    | 102.0                  | 6.88      | 1.98        | 100-5000                     | 30                            | 100                           | DEXTRMETHORPHAN (125-71-3)         | 100                         | 9.33                    | 101.0                  | 7.20      | 1.02        | 100-5000                     | 30                            | 100                           |
|                                     | 1000                        |                         | 112.8                  | 8.10      | 12.8        |                              |                               |                               |                                    | 1000                        |                         | 110.1                  | 4.82      | 10.1        |                              |                               |                               |
|                                     | 5000                        |                         | 104.5                  | 2.27      | 4.47        |                              |                               |                               |                                    | 5000                        |                         | 105.6                  | 2.27      | 5.59        |                              |                               |                               |
| 2C-C (88441-15-0)                   | 100                         | 7.31                    | 111.7                  | 11.5      | 11.7        | 100-5000                     | 30                            | 100                           | DIAZEPAM (439-14-5)                | 100                         | 12.37                   | 89.73                  | 9.18      | -10.3       | 100-5000                     | 30                            | 100                           |
|                                     | 1000                        |                         | 91.32                  | 16.0      | -8.68       |                              |                               |                               |                                    | 1000                        |                         | 116.8                  | 7.59      | 16.8        |                              |                               |                               |
|                                     | 5000                        |                         | 104.1                  | 8.79      | 4.11        |                              |                               |                               |                                    | 5000                        |                         | 101.3                  | 7.20      | 1.30        |                              |                               |                               |
| 2C-D (25505-65-1)                   | 100                         | 7.56                    | 107.5                  | 7.33      | 7.50        | 100-5000                     | 30                            | 100                           | DICLAZEPAM (2894-68-0)             | 100                         | 12.40                   | 99.30                  | 9.45      | -0.700      | 100-5000                     | 30                            | 100                           |
|                                     | 1000                        |                         | 105.1                  | 6.89      | 5.12        |                              |                               |                               |                                    | 1000                        |                         | 114.9                  | 4.15      | 14.9        |                              |                               |                               |
|                                     | 5000                        |                         | 113.4                  | 3.51      | 13.4        |                              |                               |                               |                                    | 5000                        |                         | 106.3                  | 3.69      | 6.28        |                              |                               |                               |
| 2C-G (327175-14-4)                  | 100                         | 8.59                    | 114.0                  | 7.51      | 14.0        | 100-5000                     | 30                            | 100                           | DICLOFENSINE (34041-84-4)          | 10                          | 11.04                   | 93.94                  | 10.9      | -6.07       | 10-5000                      | 3                             | 10                            |
|                                     | 1000                        |                         | 117.0                  | 4.40      | 17.0        |                              |                               |                               |                                    | 100                         |                         | 104.6                  | 4.37      | 4.57        |                              |                               |                               |
|                                     | 5000                        |                         | 98.13                  | 7.63      | -1.87       |                              |                               |                               |                                    | 1000                        |                         | 106.4                  | 5.65      | 6.41        |                              |                               |                               |
| 2-CHLOROAMPHETAMINE (35334-29-3)    | 10                          | 6.59                    | 91.69                  | 14.0      | -8.31       | 10-5000                      | 3                             | 10                            | DIETHYLCATHINONE (134-80-5)        | 100                         | 5.41                    | 97.16                  | 7.02      | -2.84       | 100-5000                     | 30                            | 100                           |
|                                     | 100                         |                         | 92.00                  | 7.10      | -8.00       |                              |                               |                               |                                    | 1000                        |                         | 88.88                  | 5.41      | -11.1       |                              |                               |                               |
|                                     | 1000                        |                         | 97.52                  | 8.73      | -2.48       |                              |                               |                               |                                    | 5000                        |                         | 100.0                  | 3.93      | 0.00        |                              |                               |                               |
|                                     | 2000                        |                         | 93.44                  | 7.93      | -6.56       |                              |                               |                               |                                    | 100                         |                         | 100.7                  | 4.15      | 0.700       |                              |                               |                               |
| 2C-I (64584-32-3)                   | 100                         | 8.45                    | 117.6                  | 7.52      | 17.6        | 100-1000                     | 30                            | 100                           | DIHYDROCODEINE (125-28-0)          | 100                         | 4.41                    | 108.7                  | 8.13      | 8.69        | 100-5000                     | 30                            | 100                           |
|                                     | 1000                        |                         | 114.8                  | 5.88      | 14.8        |                              |                               |                               |                                    | 1000                        |                         | 86.85                  | 4.66      | -13.2       |                              |                               |                               |
|                                     | 100                         |                         | 93.63                  | 9.71      | -6.37       |                              |                               |                               |                                    | 5000                        |                         | 81.87                  | 8.46      | -18.1       |                              |                               |                               |
| 2C-P (1359704-27-0)                 | 100                         | 10.14                   | 109.8                  | 11.3      | 9.77        | 100-5000                     | 30                            | 100                           | DIMETHOCAINE (553-63-9)            | 100                         | 6.36                    | 100.7                  | 4.15      | 0.700       | 100-5000                     | 30                            | 100                           |
|                                     | 1000                        |                         | 101.6                  | 6.85      | 1.56        |                              |                               |                               |                                    | 1000                        |                         | 115.6                  | 8.12      | 15.6        |                              |                               |                               |
|                                     | 5000                        |                         | 107.6                  | 3.91      | 7.60        |                              |                               |                               |                                    | 5000                        |                         | 107.1                  | 3.09      | 7.11        |                              |                               |                               |
| 2C-T-7 (850140-15-7)                | 1000                        | 9.64                    | 99.12                  | 43.4      | -           | 100-5000                     | 30                            | 100                           | DIMETHYLONE                        | 100                         | 4.93                    | 92.36                  | 7.36      | -7.64       | 100-                         | 30                            | 100                           |

| Analyte (CAS numer)                               | C<br>(ng mL <sup>-1</sup> ) | t <sub>R</sub><br>(min) | R <sub>av</sub><br>(%) | CV<br>(%) | BIAS<br>(%) | RA<br>(ng mL <sup>-1</sup> ) | LOD<br>(ng mL <sup>-1</sup> ) | LOQ<br>(ng mL <sup>-1</sup> ) | Analyte (CAS numer)           | C<br>(ng mL <sup>-1</sup> ) | t <sub>R</sub><br>(min) | R <sub>av</sub><br>(%) | CV<br>(%) | BIAS<br>(%) | RA<br>(ng mL <sup>-1</sup> ) | LOD<br>(ng mL <sup>-1</sup> ) | LOQ<br>(ng mL <sup>-1</sup> ) |
|---------------------------------------------------|-----------------------------|-------------------------|------------------------|-----------|-------------|------------------------------|-------------------------------|-------------------------------|-------------------------------|-----------------------------|-------------------------|------------------------|-----------|-------------|------------------------------|-------------------------------|-------------------------------|
|                                                   |                             |                         |                        |           | 0.880       |                              |                               |                               |                               |                             |                         |                        |           |             |                              |                               |                               |
|                                                   | 5000                        |                         | 103.9                  | 5.47      | 3.93        |                              |                               |                               | (109367-07-9)                 | 1000                        |                         | 92.61                  | 7.95      | -7.39       | 5000                         |                               |                               |
|                                                   | 10                          |                         | 109.1                  | 4.77      | 9.14        |                              |                               |                               |                               | 5000                        |                         | 94.79                  | 3.83      | -5.21       |                              |                               |                               |
|                                                   | 100                         |                         | 117.6                  | 6.32      | 17.6        |                              |                               |                               |                               | 100                         |                         | 106.2                  | 3.51      | 6.22        |                              |                               |                               |
| 2C-TFM (159277-13-1)                              | 1000                        | 8.68                    | 108.4                  | 3.04      | 8.41        | 10-5000                      | 3                             | 10                            | DIPHENHYDRAMINE<br>(147-24-0) | 1000                        | 9.34                    | 109.9                  | 6.35      | 9.92        | 100-5000                     | 30                            | 100                           |
|                                                   | 2000                        |                         | -                      | -         | -           |                              |                               |                               |                               | 5000                        |                         | 101.5                  | 3.38      | 1.49        |                              |                               |                               |
|                                                   | 5000                        |                         | 99.09                  | 6.64      | 0.910       |                              |                               |                               |                               | 100                         |                         | 108.5                  | 6.36      | 8.46        |                              |                               |                               |
|                                                   | 10                          |                         | 80.30                  | 4.58      | -19.7       |                              |                               |                               | DIPHENIDINE<br>(28383-15-5)   | 1000                        | 8.81                    | 105.2                  | 8.65      | 5.24        | 100-5000                     | 30                            | 100                           |
|                                                   | 100                         |                         | 104.1                  | 9.05      | 4.08        |                              |                               |                               |                               | 5000                        |                         | 90.35                  | 4.71      | -9.65       |                              |                               |                               |
| 2-FEC (2446466-63-1)                              | 1000                        | 4.99                    | 90.54                  | 3.90      | -9.46       | 10-5000                      | 3                             | 10                            | DiPT (14780-24-6)             | 100                         | 7.79                    | 107.7                  | 4.15      | 7.69        | 100-5000                     | 30                            | 100                           |
|                                                   | 2000                        |                         | 84.46                  | 3.12      | -15.5       |                              |                               |                               |                               | 1000                        |                         | 118.8                  | 4.92      | 18.8        |                              |                               |                               |
|                                                   | 5000                        |                         | 92.11                  | 3.99      | -7.89       |                              |                               |                               |                               | 5000                        |                         | 107.8                  | 5.14      | 7.84        |                              |                               |                               |
|                                                   | 10                          |                         | 94.79                  | 11.8      | -5.21       |                              |                               |                               |                               | 10                          |                         | 101.4                  | 7.29      | 1.43        |                              |                               |                               |
| 2-FIC (1909305-71-0)                              | 100                         | 3.21                    | 101.9                  | 5.02      | 1.92        | 10-100                       | 3                             | 10                            | DL-4662<br>(1674389-55-9)     | 100                         | 7.34                    | 113.6                  | 9.75      | 13.6        | 10-5000                      | 3                             | 10                            |
|                                                   | 1000                        |                         | 33.13                  | 3.65      | -66.9       |                              |                               |                               |                               | 1000                        |                         | 108.4                  | 3.34      | 8.39        |                              |                               |                               |
|                                                   | 2000                        |                         | 28.23                  | 1.65      | -71.8       |                              |                               |                               |                               | 2000                        |                         | 97.71                  | 6.02      | -2.29       |                              |                               |                               |
|                                                   | 5000                        |                         | 27.82                  | 4.75      | -72.2       |                              |                               |                               |                               | 5000                        |                         | 89.19                  | 3.62      | -10.81      |                              |                               |                               |
|                                                   | 100                         |                         | 111.3                  | 7.36      | 11.3        |                              |                               |                               |                               | 100                         |                         | 104.8                  | 8.77      | 4.78        |                              |                               |                               |
| 2-FLUOROAMPHETAMINE (1626-69-3)                   | 1000                        | 5.14                    | 110.3                  | 6.43      | 10.3        | 100-5000                     | 30                            | 100                           | DOI (42203-78-1)              | 1000                        | 8.98                    | 112.3                  | 7.85      | 12.3        | 100-5000                     | 30                            | 100                           |
|                                                   | 5000                        |                         | 100.4                  | 6.05      | 0.400       |                              |                               |                               |                               | 5000                        |                         | 99.72                  | 3.71      | -0.280      |                              |                               |                               |
|                                                   | 100                         |                         | 116.8                  | 4.71      | 16.8        |                              |                               |                               |                               | 100                         |                         | 107.9                  | 7.14      | 7.85        |                              |                               |                               |
| 2-FLUOROMETHAMPHETAMINE (2-FMA)<br>(1780004-19-4) | 1000                        | 5.39                    | 90.19                  | 9.59      | -9.81       | 100-5000                     | 30                            | 100                           | DOTHIEPIN<br>(113-53-1)       | 1000                        | 10.24                   | 107.7                  | 4.58      | 7.72        | 100-5000                     | 30                            | 100                           |
|                                                   | 5000                        |                         | 80.53                  | 12.2      | -19.5       |                              |                               |                               |                               | 5000                        |                         | 99.38                  | 5.27      | -0.620      |                              |                               |                               |
|                                                   | 100                         |                         | 90.71                  | 10.2      | -9.29       |                              |                               |                               |                               | 100                         |                         | 105.5                  | 3.67      | 5.52        |                              |                               |                               |
| 2-FLUOROMETHCATHINONE (2-FMC)<br>(1346599-37-8)   | 1000                        | 4.10                    | 93.91                  | 7.54      | -6.09       | 100-5000                     | 30                            | 100                           | DOXEPIN (1229-29-4)           | 1000                        | 9.59                    | 106.0                  | 6.90      | 6.02        | 100-5000                     | 30                            | 100                           |
|                                                   | 5000                        |                         | 89.74                  | 8.07      | -10.3       |                              |                               |                               |                               | 5000                        |                         | 102.3                  | 4.64      | 2.31        |                              |                               |                               |
|                                                   | 10                          |                         | 119.1                  | 8.38      | 19.1        |                              |                               |                               |                               | 100                         |                         | 84.21                  | 13.8      | -15.8       |                              |                               |                               |
| 2-IODOAMPHETAMINE (22080-10-0)                    | 100                         | 7.77                    | 104.3                  | 3.46      | 4.32        | 10-5000                      | 3                             | 10                            | DOXYLAMINE<br>(469-21-6)      | 1000                        | 6.08                    | 115.7                  | 4.86      | 15.7        | 100-5000                     | 30                            | 100                           |
|                                                   | 1000                        |                         | 101.2                  | 9.53      | 1.21        |                              |                               |                               |                               | 5000                        |                         | 117.9                  | 5.72      | 17.9        |                              |                               |                               |
|                                                   | 2000                        |                         | 96.55                  | 11.7      | -3.45       |                              |                               |                               |                               | 10                          |                         | 84.10                  | 11.5      | -15.9       |                              |                               |                               |
|                                                   | 5000                        |                         | 99.19                  | 7.92      | -0.81       |                              |                               |                               | EAM-2201<br>(1364933-60-7)    | 100                         | 14.95                   | 105.7                  | 11.1      | 5.68        | 10-1000                      | 3                             | 10                            |
|                                                   | 10                          |                         | 94.83                  | 7.33      | -5.17       |                              |                               |                               |                               | 1000                        |                         | 115.9                  | 5.23      | 15.9        |                              |                               |                               |
|                                                   | 100                         |                         | 94.95                  | 3.87      | -5.05       |                              |                               |                               |                               | 100                         |                         | 91.82                  | 3.80      | -8.18       |                              |                               |                               |
| 2-MAPB (100389-74-0)                              | 1000                        | 7.07                    | 108.2                  | 6.50      | 8.23        | 10-2000                      | 3                             | 10                            | EDDP (31161-17-8)             | 1000                        | 9.4                     | 105.8                  | 5.30      | 5.84        | 100-5000                     | 30                            | 100                           |
|                                                   | 2000                        |                         | 91.76                  | 24.4      | -8.24       |                              |                               |                               |                               | 5000                        |                         | 95.99                  | 9.00      | -4.01       |                              |                               |                               |
|                                                   | 5000                        |                         | 74.33                  | 38.2      | -25.7       |                              |                               |                               |                               | 10                          | 15.66                   | 83.81                  | 14.5      | -16.2       | 10-1000                      | 3                             | 10                            |
| 2-MeOMC                                           | 10                          | 5.33                    | 95.75                  | 14.11     | -4.25       | 10-5000                      | 3                             | 10                            | EG-2201<br>(2365471-72-1)     | 100                         |                         | 45.03                  | 9.25      | -55.0       |                              |                               |                               |

| Analyte (CAS numer)                                  | C<br>(ng mL <sup>-1</sup> ) | t <sub>R</sub><br>(min) | R <sub>av</sub><br>(%) | CV<br>(%) | BIAS<br>(%) | RA<br>(ng mL <sup>-1</sup> ) | LOD<br>(ng mL <sup>-1</sup> ) | LOQ<br>(ng mL <sup>-1</sup> ) | Analyte (CAS numer)                        | C<br>(ng mL <sup>-1</sup> ) | t <sub>R</sub><br>(min) | R <sub>av</sub><br>(%) | CV<br>(%) | BIAS<br>(%) | RA<br>(ng mL <sup>-1</sup> ) | LOD<br>(ng mL <sup>-1</sup> ) | LOQ<br>(ng mL <sup>-1</sup> ) |
|------------------------------------------------------|-----------------------------|-------------------------|------------------------|-----------|-------------|------------------------------|-------------------------------|-------------------------------|--------------------------------------------|-----------------------------|-------------------------|------------------------|-----------|-------------|------------------------------|-------------------------------|-------------------------------|
|                                                      | 100                         |                         | 116.4                  | 6.12      | 16.4        |                              |                               |                               |                                            | 1000                        |                         | 115.1                  | 2.87      | 15.1        |                              |                               |                               |
|                                                      | 1000                        |                         | 75.34                  | 5.13      | -24.7       |                              |                               |                               |                                            | 10                          |                         | 83.38                  | 16.9      | -16.6       |                              |                               |                               |
|                                                      | 2000                        |                         | 73.62                  | 5.14      | -26.4       |                              |                               |                               |                                            | 100                         |                         | 108.9                  | 13.0      | 8.91        |                              |                               |                               |
|                                                      | 5000                        |                         | 87.74                  | 5.14      | -12.3       |                              |                               |                               |                                            | 1000                        |                         | 42.38                  | 6.47      | -57.6       |                              |                               |                               |
| 2-METHOXY-2-PHENYLETHYLAMINE<br>(62064-68-0)         | 10                          | 4.98                    | 91.37                  | 10.4      | -8.63       | 10-100                       | 3                             | 10                            | ERGOMETRINE<br>(60-79-7)                   | 1000                        | 5.33                    | 115.1                  | 2.87      | 15.1        | 10-100                       | 3                             | 10                            |
|                                                      | 100                         |                         | 107.7                  | 11.04     | 7.71        |                              |                               |                               |                                            | 10                          |                         | 83.38                  | 16.9      | -16.6       |                              |                               |                               |
|                                                      | 1000                        |                         | 43.29                  | 4.52      | -56.7       |                              |                               |                               |                                            | 1000                        |                         | 108.9                  | 13.0      | 8.91        |                              |                               |                               |
|                                                      | 2000                        |                         | 38.60                  | 4.77      | -61.4       |                              |                               |                               |                                            | 1000                        |                         | 42.38                  | 6.47      | -57.6       |                              |                               |                               |
| 2-METHOXYAMPHETAMINE (2-MA)<br>(72739-03-8)          | 100                         | 6.21                    | 106.4                  | 8.52      | 6.43        | 100-5000                     | 30                            | 100                           | ETAQUALONE<br>(7432-25-9)                  | 1000                        | 11.99                   | 108.6                  | 5.15      | 8.55        | 100-5000                     | 30                            | 100                           |
|                                                      | 1000                        |                         | 117.9                  | 5.95      | 17.9        |                              |                               |                               |                                            | 1000                        |                         | 113.6                  | 6.40      | 13.6        |                              |                               |                               |
|                                                      | 5000                        |                         | 105.6                  | 3.29      | 5.57        |                              |                               |                               |                                            | 5000                        |                         | 99.44                  | 6.41      | -0.560      |                              |                               |                               |
|                                                      | 100                         |                         | 106.4                  | 8.52      | 6.43        |                              |                               |                               |                                            | 100                         |                         | 108.6                  | 5.15      | 8.55        |                              |                               |                               |
| 2-METHOXYMETHAMPHETAMINE (2-MeOMA) (5588-10-3)       | 100                         | 6.42                    | 105.9                  | 9.88      | 5.85        | 100-5000                     | 30                            | 100                           | ETHCATHINONE<br>METABOLITE<br>(63401-08-1) | 100                         | 4.77                    | 104.0                  | 8.12      | 3.95        | 100-5000                     | 30                            | 100                           |
|                                                      | 1000                        |                         | 110.8                  | 7.07      | 10.8        |                              |                               |                               |                                            | 1000                        |                         | 91.30                  | 4.54      | -8.70       |                              |                               |                               |
|                                                      | 5000                        |                         | 108.3                  | 3.95      | 8.34        |                              |                               |                               |                                            | 5000                        |                         | 86.00                  | 8.69      | -14.0       |                              |                               |                               |
| 2-METHYLAMINO-1-PHENYLBUTANE<br>(84952-63-6)         | 10                          | 6.23                    | 89.60                  | 9.93      | -10.4       | 10-5000                      | 3                             | 10                            | ETHYLONE<br>(1454266-19-3)                 | 100                         | 5.26                    | 104.1                  | 9.49      | 4.12        | 100-5000                     | 30                            | 100                           |
|                                                      | 100                         |                         | 91.85                  | 8.60      | -8.15       |                              |                               |                               |                                            | 1000                        |                         | 88.29                  | 6.39      | -11.7       |                              |                               |                               |
|                                                      | 1000                        |                         | 106.3                  | 2.98      | 6.30        |                              |                               |                               |                                            | 5000                        |                         | 103.4                  | 4.59      | 3.43        |                              |                               |                               |
|                                                      | 2000                        |                         | 88.66                  | 4.49      | -11.3       |                              |                               |                               |                                            | 100                         |                         | 113.9                  | 2.97      | 13.9        |                              |                               |                               |
| 2-METHYLMETHCATHINONE (2-MMC)<br>(1246815-51-9)      | 10                          | 5.81                    | 109.7                  | 3.13      | 9.71        | 100-5000                     | 30                            | 100                           | ETHYLPHENIDATE (214149-46-9)               | 1000                        | 8.22                    | 115.0                  | 5.03      | 15.0        | 100-5000                     | 30                            | 100                           |
|                                                      | 1000                        |                         | 104.7                  | 3.10      | 4.71        |                              |                               |                               |                                            | 1000                        |                         | 104.3                  | 3.88      | 4.29        |                              |                               |                               |
|                                                      | 5000                        |                         | 107.2                  | 12.4      | 7.21        |                              |                               |                               |                                            | 5000                        |                         | 104.3                  | 3.88      | 4.29        |                              |                               |                               |
|                                                      | 100                         |                         | 109.7                  | 3.13      | 9.71        |                              |                               |                               |                                            | 100                         |                         | 103.1                  | 5.74      | 3.12        |                              |                               |                               |
| 2-METHYL-PBP (22198-75-0)                            | 10                          | 7.51                    | 94.12                  | 13.9      | -5.88       | 10-5000                      | 3                             | 10                            | ETIZOLAM<br>(40054-69-1)                   | 1000                        | 11.80                   | 115.1                  | 5.70      | 15.1        | 100-5000                     | 30                            | 100                           |
|                                                      | 100                         |                         | 103.2                  | 3.68      | 3.20        |                              |                               |                               |                                            | 5000                        |                         | 113.6                  | 2.24      | 13.6        |                              |                               |                               |
|                                                      | 1000                        |                         | 103.6                  | 8.90      | 3.57        |                              |                               |                               |                                            | 100                         |                         | 97.87                  | 6.27      | -2.13       |                              |                               |                               |
|                                                      | 2000                        |                         | 92.08                  | 9.83      | -7.92       |                              |                               |                               |                                            | 1000                        |                         | 103.9                  | 4.95      | 3.91        |                              |                               |                               |
| 2-METHYL-PPP (2749897-10-5)                          | 10                          | 6.52                    | 114.6                  | 12.1      | 14.6        | 10-5000                      | 3                             | 10                            | EUTYLONE<br>(17764-18-0)                   | 1000                        | 8.38                    | 116.8                  | 4.69      | 16.8        | 100-5000                     | 30                            | 100                           |
|                                                      | 100                         |                         | 88.47                  | 9.08      | -11.5       |                              |                               |                               |                                            | 5000                        |                         | 94.53                  | 4.55      | -5.47       |                              |                               |                               |
|                                                      | 1000                        |                         | 98.49                  | 8.69      | -1.51       |                              |                               |                               |                                            | 100                         |                         | 83.82                  | 11.85     | -16.2       |                              |                               |                               |
|                                                      | 2000                        |                         | 102.1                  | 8.15      | 2.05        |                              |                               |                               |                                            | 100                         |                         | 115.1                  | 5.17      | 15.1        |                              |                               |                               |
| 3,4-DICHLOROMETHYLPHENIDATE (3,4-CTMP) (214149-42-5) | 100                         | 10.02                   | 102.8                  | 5.74      | 2.75        | 100-5000                     | 30                            | 100                           | FENTANYL (437-38-7)                        | 1000                        | 8.82                    | 115.8                  | 2.76      | 15.8        | 10-5000                      | 3                             | 10                            |
|                                                      | 1000                        |                         | 108.4                  | 5.49      | 8.42        |                              |                               |                               |                                            | 1000                        |                         | 107.3                  | 4.86      | 7.33        |                              |                               |                               |
|                                                      | 5000                        |                         | 108.2                  | 6.54      | 8.22        |                              |                               |                               |                                            | 5000                        |                         | 103.7                  | 3.88      | 3.69        |                              |                               |                               |
| 3,4-DIMETHOXY-ALPHA-PVP (850351-99-4)                | 10                          | 7.45                    | 48.86                  | 35.2      | -51.1       | 100-5000                     | 30                            | 100                           | FLUBROMAZEPAM<br>(2647-50-9)               | 100                         | 11.84                   | 81.6                   | 16.9      | -18.4       | 100-5000                     | 30                            | 100                           |
|                                                      | 100                         |                         | 117.0                  | 4.30      | 17.0        |                              |                               |                               |                                            | 5000                        |                         | 108.3                  | 4.43      | 8.33        |                              |                               |                               |

| Analyte (CAS numer)                                 | C<br>(ng mL <sup>-1</sup> ) | t <sub>R</sub><br>(min) | R <sub>av</sub><br>(%) | CV<br>(%) | BIAS<br>(%) | RA<br>(ng mL <sup>-1</sup> ) | LOD<br>(ng mL <sup>-1</sup> ) | LOQ<br>(ng mL <sup>-1</sup> ) | Analyte (CAS numer)           | C<br>(ng mL <sup>-1</sup> ) | t <sub>R</sub><br>(min) | R <sub>av</sub><br>(%) | CV<br>(%) | BIAS<br>(%) | RA<br>(ng mL <sup>-1</sup> ) | LOD<br>(ng mL <sup>-1</sup> ) | LOQ<br>(ng mL <sup>-1</sup> ) |
|-----------------------------------------------------|-----------------------------|-------------------------|------------------------|-----------|-------------|------------------------------|-------------------------------|-------------------------------|-------------------------------|-----------------------------|-------------------------|------------------------|-----------|-------------|------------------------------|-------------------------------|-------------------------------|
|                                                     | 1000                        |                         | 118.4                  | 4.45      | 18.4        |                              |                               |                               |                               |                             |                         |                        |           |             |                              |                               |                               |
|                                                     | 2000                        |                         | 106.8                  | 3.01      | 6.81        |                              |                               |                               | FLUDIAZEPAM (3900-31-0)       | 1000                        | 12.07                   | 119.5                  | 6.89      | 19.5        | 100-5000                     | 30                            | 100                           |
|                                                     | 5000                        |                         | 92.69                  | 6.07      | -7.31       |                              |                               |                               |                               | 5000                        |                         | 103.6                  | 5.35      | 3.56        |                              |                               |                               |
| 3,4-DIMETHYLMETHCATHINONE (3,4-DMMC) (1081772-06-6) | 100                         | 7.39                    | 109.0                  | 4.40      | 9.02        | 100-5000                     | 30                            | 100                           | FLUMAZENIL (78755-81-4)       | 100                         | 9.31                    | 114.3                  | 7.04      | 14.3        | 100-5000                     | 30                            | 100                           |
|                                                     | 1000                        |                         | 90.93                  | 15.7      | -9.07       |                              |                               |                               |                               | 1000                        |                         | 117.5                  | 4.09      | 17.5        |                              |                               |                               |
|                                                     | 5000                        |                         | 110.2                  | 2.70      | 10.2        |                              |                               |                               |                               | 5000                        |                         | 99.70                  | 4.53      | -0.300      |                              |                               |                               |
| 3,4-DMEC (2748561-69-3)                             | 10                          | 7.76                    | 100.6                  | 18.7      | 0.56        | 10-5000                      | 3                             | 10                            | FLUNITRAZEPAM (1622-62-4)     | 100                         | 10.91                   | 95.19                  | 10.7      | -4.81       | 100-5000                     | 30                            | 100                           |
|                                                     | 100                         |                         | 96.15                  | 5.69      | -3.85       |                              |                               |                               |                               | 1000                        |                         | 116.6                  | 3.20      | 16.6        |                              |                               |                               |
|                                                     | 1000                        |                         | 106.9                  | 5.66      | 6.92        |                              |                               |                               |                               | 5000                        |                         | 103.6                  | 5.85      | 3.63        |                              |                               |                               |
|                                                     | 2000                        |                         | 95.63                  | 2.03      | -4.37       |                              |                               |                               | FLUOXETINE (56296-78-7)       | 100                         | 11.24                   | 107.8                  | 8.71      | 7.77        | 100-5000                     | 0.5                           | 100                           |
|                                                     | 5000                        |                         | 94.43                  | 10.3      | -5.57       |                              |                               |                               |                               | 1000                        |                         | 109.4                  | 5.88      | 9.39        |                              |                               |                               |
|                                                     |                             |                         |                        |           |             |                              |                               |                               |                               | 5000                        |                         | 101.9                  | 5.72      | 1.90        |                              |                               |                               |
| 3,4-DMMA (70932-18-2)                               | 100                         | 5.35                    | 115.8                  | 2.49      | 15.8        | 100-5000                     | 30                            | 100                           | FLURAZEPAM (17617-23-1)       | 100                         | 9.43                    | 101.1                  | 3.64      | 1.10        | 100-5000                     | 30                            | 100                           |
|                                                     | 1000                        |                         | 104.4                  | 6.84      | 4.37        |                              |                               |                               |                               | 1000                        |                         | 115.4                  | 5.63      | 15.4        |                              |                               |                               |
|                                                     | 5000                        |                         | 93.68                  | 8.05      | -6.32       |                              |                               |                               |                               | 5000                        |                         | 99.24                  | 6.61      | -0.760      |                              |                               |                               |
| 3,4-EDMA (2748304-41-6)                             | 10                          | 5.63                    | 82.93                  | 13.0      | -17.1       | 10-5000                      | 3                             | 10                            | FUB-144 (2185863-15-2)        | 10                          | 14.96                   | 80.26                  | 12.3      | -19.7       | 10-1000                      | 3                             | 10                            |
|                                                     | 100                         |                         | 108.3                  | 6.75      | 8.32        |                              |                               |                               |                               | 100                         |                         | 89.09                  | 5.61      | -10.9       |                              |                               |                               |
|                                                     | 1000                        |                         | 81.23                  | 3.82      | -18.8       |                              |                               |                               |                               | 1000                        |                         | 100.4                  | 7.91      | 0.350       |                              |                               |                               |
|                                                     | 2000                        |                         | 76.71                  | 4.94      | -23.3       |                              |                               |                               |                               |                             |                         |                        |           |             |                              |                               |                               |
|                                                     | 5000                        |                         | 84.64                  | 3.99      | -15.4       |                              |                               |                               | FUB-JWH-018 (2365471-45-8)    | 10                          | 14.47                   | 105.4                  | 7.96      | 5.44        | 10-1000                      | 3                             | 10                            |
|                                                     |                             |                         |                        |           |             |                              |                               |                               |                               | 100                         |                         | 93.91                  | 4.83      | -6.09       |                              |                               |                               |
|                                                     |                             |                         |                        |           |             |                              |                               |                               |                               | 1000                        |                         | 118.6                  | 4.32      | 18.6        |                              |                               |                               |
| 3,4-EDMC (30253-44-2)                               | 10                          | 5.25                    | 91.46                  | 10.1      | -8.55       | 10-5000                      | 3                             | 10                            | FUB-NPB-22 (2244864-90-0)     | 10                          | 13.66                   | 96.34                  | 11.0      | -3.66       | 10-1000                      | 3                             | 10                            |
|                                                     | 100                         |                         | 101.6                  | 10.4      | 1.63        |                              |                               |                               |                               | 100                         |                         | 87.73                  | 10.1      | -12.3       |                              |                               |                               |
|                                                     | 1000                        |                         | 78.76                  | 2.46      | -21.2       |                              |                               |                               |                               | 1000                        |                         | 119.0                  | 2.80      | 19.0        |                              |                               |                               |
|                                                     | 2000                        |                         | 70.80                  | 5.05      | -29.2       |                              |                               |                               |                               |                             |                         |                        |           |             |                              |                               |                               |
|                                                     | 5000                        |                         | 88.08                  | 3.96      | -11.9       |                              |                               |                               |                               |                             |                         |                        |           |             |                              |                               |                               |
| 3,4-MDMA (ECSTAZY) (64057-70-1)                     | 100                         | 5.37                    | 116.1                  | 4.76      | 16.1        | 100-5000                     | 30                            | 100                           | FURANYLFENTANYL (101365-56-4) | 100                         | 8.95                    | 107.4                  | 2.38      | 7.36        | 100-5000                     | 30                            | 100                           |
|                                                     | 1000                        |                         | 93.67                  | 4.53      | -6.33       |                              |                               |                               |                               | 1000                        |                         | 119.3                  | 8.06      | 19.3        |                              |                               |                               |
|                                                     | 5000                        |                         | 113.8                  | 5.18      | 13.8        |                              |                               |                               |                               | 5000                        |                         | 100.6                  | 5.28      | 0.590       |                              |                               |                               |
| 3,4-MDPA (74341-77-8)                               | 100                         | 6.82                    | 113.8                  | 7.84      | 13.8        | 100-5000                     | 30                            | 100                           | GHB (502-85-2)                | 100                         | 1.41                    | 119.5                  | 8.68      | 19.5        | 100-5000                     | 30                            | 100                           |
|                                                     | 1000                        |                         | 116.4                  | 3.64      | 16.4        |                              |                               |                               |                               | 1000                        |                         | 103.6                  | 8.29      | 3.62        |                              |                               |                               |
|                                                     | 5000                        |                         | 106.4                  | 3.90      | 6.42        |                              |                               |                               |                               |                             |                         |                        |           |             |                              |                               |                               |
|                                                     |                             |                         |                        |           |             |                              |                               |                               | HARMALINE (302-21-2)          | 10                          | 7.47                    | 102.1                  | 17.7      | 2.06        |                              |                               |                               |
|                                                     | 10                          |                         | 56.00                  | 20.2      | -44.0       |                              |                               |                               |                               | 100                         |                         | 109.7                  | 9.76      | 9.72        |                              |                               |                               |
|                                                     | 100                         |                         | 94.36                  | 7.95      | -5.64       |                              |                               |                               |                               | 1000                        |                         | 101.9                  | 6.29      | 1.91        | 10-5000                      | 3                             | 10                            |
|                                                     | 1000                        |                         | 98.81                  | 3.99      | -1.19       |                              |                               |                               |                               | 2000                        |                         | 91.77                  | 5.09      | -8.23       |                              |                               |                               |
|                                                     | 2000                        |                         | 93.91                  | 3.77      | -6.09       |                              |                               |                               |                               | 5000                        |                         | 84.46                  | 5.58      | -15.5       |                              |                               |                               |
|                                                     | 5000                        |                         | 91.41                  | 4.77      | -8.59       |                              |                               |                               |                               |                             |                         |                        |           |             |                              |                               |                               |
| 3,4-METHYLENEDIOXYPYROVALERONE (24622-62-6)         | 10                          | 7.53                    | 88.35                  | 6.85      | -11.7       | 10-5000                      | 3                             | 10                            | HARMINE (442-51-3)            | 100                         | 8.03                    | 98.51                  | 6.39      | -1.49       | 100-5000                     | 30                            | 100                           |
|                                                     | 100                         |                         | 100.1                  | 4.64      | 0.060       |                              |                               |                               |                               | 1000                        |                         | 115.6                  | 4.65      | 15.6        |                              |                               |                               |
|                                                     | 1000                        |                         | 99.40                  | 2.70      | -           |                              |                               |                               | HYDROCODONE (125-29-1)        | 5000                        |                         | 102.0                  | 2.60      | 1.96        |                              |                               |                               |
|                                                     |                             |                         |                        |           |             |                              |                               |                               |                               | 100                         | 4.99                    | 108.0                  | 6.24      | 8.04        | 100-                         | 30                            | 100                           |

| Analyte (CAS numer)                             | C<br>(ng mL <sup>-1</sup> ) | t <sub>R</sub><br>(min) | R <sub>av</sub><br>(%) | CV<br>(%) | BIAS<br>(%) | RA<br>(ng mL <sup>-1</sup> ) | LOD<br>(ng mL <sup>-1</sup> ) | LOQ<br>(ng mL <sup>-1</sup> ) | Analyte (CAS numer)                                | C<br>(ng mL <sup>-1</sup> ) | t <sub>R</sub><br>(min) | R <sub>av</sub><br>(%) | CV<br>(%) | BIAS<br>(%) | RA<br>(ng mL <sup>-1</sup> ) | LOD<br>(ng mL <sup>-1</sup> ) | LOQ<br>(ng mL <sup>-1</sup> ) |
|-------------------------------------------------|-----------------------------|-------------------------|------------------------|-----------|-------------|------------------------------|-------------------------------|-------------------------------|----------------------------------------------------|-----------------------------|-------------------------|------------------------|-----------|-------------|------------------------------|-------------------------------|-------------------------------|
|                                                 |                             |                         |                        |           | 0.600       |                              |                               |                               |                                                    |                             |                         |                        |           |             |                              |                               |                               |
|                                                 | 2000                        |                         | 93.15                  | 4.22      | -6.85       |                              |                               |                               |                                                    | 1000                        |                         | 103.2                  | 8.40      | 3.24        | 5000                         |                               |                               |
|                                                 | 5000                        |                         | 89.27                  | 3.72      | -10.7       |                              |                               |                               |                                                    | 5000                        |                         | 92.87                  | 6.59      | -7.13       |                              |                               |                               |
| 3,4-METHYLENEDIOXY_PV9 (24646-40-0)             | 10                          | 10.84                   | 105.6                  | 8.61      | 5.55        | 10-5000                      | 3                             | 10                            | IBOGAINE<br>(5934-55-4)                            | 100                         | 8.05                    | 99.76                  | 7.83      | -0.24       | 100-5000                     | 30                            | 100                           |
|                                                 | 100                         |                         | 101.6                  | 4.31      | 1.57        |                              |                               |                               |                                                    | 1000                        |                         | 106.8                  | 7.59      | 6.77        |                              |                               |                               |
|                                                 | 1000                        |                         | 102.9                  | 4.45      | 2.88        |                              |                               |                               |                                                    | 5000                        |                         | 87.64                  | 6.47      | -12.4       |                              |                               |                               |
|                                                 | 2000                        |                         | 92.84                  | 3.01      | -7.16       |                              |                               |                               |                                                    | 100                         |                         | 111.5                  | 5.26      | 11.5        |                              |                               |                               |
|                                                 | 5000                        |                         | 83.66                  | 3.92      | -16.3       |                              |                               |                               |                                                    | 1000                        |                         | 113.9                  | 6.50      | 13.9        |                              |                               |                               |
| 30C-NBOMe (2749391-65-7)                        | 10                          | 9.75                    | 24.99                  | 54.5      | -75.0       | 100-5000                     | 30                            | 100                           | IMIPRAMINE<br>(113-52-0)                           | 5000                        | 10.63                   | 96.80                  | 4.08      | -3.20       | 100-5000                     | 30                            | 100                           |
|                                                 | 100                         |                         | 117.5                  | 16.2      | 17.5        |                              |                               |                               |                                                    | 100                         |                         | 112.4                  | 3.43      | 124         |                              |                               |                               |
|                                                 | 1000                        |                         | 115.3                  | 6.49      | 15.3        |                              |                               |                               |                                                    | 1000                        |                         | 118.5                  | 6.85      | 18.5        |                              |                               |                               |
|                                                 | 2000                        |                         | 109.1                  | 4.36      | 9.09        |                              |                               |                               |                                                    | 5000                        |                         | 109.5                  | 4.85      | 9.51        |                              |                               |                               |
|                                                 | 5000                        |                         | 95.92                  | 7.92      | -4.08       |                              |                               |                               |                                                    | 100                         |                         | 111.3                  | 13.8      | 11.3        |                              |                               |                               |
| 3-BROMOAMPHETAMINE (1210708-61-4)               | 100                         | 7.34                    | 119.2                  | 10.2      | 19.2        | 100-5000                     | 30                            | 100                           | JWH 018 BENZIMIDAZOLE<br>ANALOG<br>(2316839-70-8)  | 10                          | 15.44                   | 88.44                  | 8.98      | -11.6       | 10-1000                      | 3                             | 10                            |
|                                                 | 1000                        |                         | 104.1                  | 10.9      | 4.10        |                              |                               |                               |                                                    | 1000                        |                         | 84.27                  | 11.1      | -15.7       |                              |                               |                               |
|                                                 | 5000                        |                         | 104.2                  | 15.3      | 4.22        |                              |                               |                               |                                                    | 10                          |                         | 32.14                  | 46.5      | -67.9       |                              |                               |                               |
| 3-BROMOMETHAMPHETAMINE (28100-41-6)             | 100                         | 7.45                    | 109.9                  | 4.95      | 9.88        | 100-5000                     | 30                            | 100                           | JWH-011<br>(155471-13-9)                           | 100                         | 15.80                   | 62.86                  | 24.3      | -37.1       | -                            | 30                            | -                             |
|                                                 | 1000                        |                         | 107.2                  | 13.4      | 7.19        |                              |                               |                               |                                                    | 1000                        |                         | 173.6                  | 6.83      | 73.6        |                              |                               |                               |
|                                                 | 5000                        |                         | 106.3                  | 8.93      | 6.26        |                              |                               |                               |                                                    | 10                          |                         | 90.56                  | 11.8      | -9.44       |                              |                               |                               |
| 3-BROMOMETHCATHINONE (3-BMC)<br>(676487-42-6)   | 100                         | 6.52                    | 106.2                  | 11.5      | 6.21        | 100-5000                     | 30                            | 100                           | JWH-018 ADAMANTYL<br>CARBOXAMIDE<br>(1345973-50-3) | 100                         | 15.72                   | 105.1                  | 16.6      | 5.14        | 10-1000                      | 3                             | 10                            |
|                                                 | 1000                        |                         | 88.68                  | 11.7      | -11.3       |                              |                               |                               |                                                    | 1000                        |                         | 106.4                  | 6.83      | 6.41        |                              |                               |                               |
|                                                 | 5000                        |                         | 84.03                  | 8.80      | -16.0       |                              |                               |                               |                                                    | 10                          |                         | 91.21                  | 11.2      | -8.80       |                              |                               |                               |
| 3-CAF (2219324-25-9)                            | 10                          | 15.30                   | 104.6                  | 11.8      | 4.58        | 10-1000                      | 3                             | 10                            | JWH-022<br>(209414-16-4)                           | 100                         | 14.75                   | 96.01                  | 8.37      | -3.99       | 10-1000                      | 3                             | 10                            |
|                                                 | 100                         |                         | 110.0                  | 9.14      | 9.98        |                              |                               |                               |                                                    | 1000                        |                         | 102.1                  | 7.52      | 2.08        |                              |                               |                               |
|                                                 | 1000                        |                         | 118.3                  | 8.66      | 18.3        |                              |                               |                               |                                                    | 10                          |                         | 90.67                  | 7.69      | -9.33       |                              |                               |                               |
| 3C-B-FLY (178557-19-2)                          | 10                          | 8.55                    | 110.8                  | 6.47      | 10.8        | 10-5000                      | 3                             | 10                            | JWH-031<br>(162934-74-9)                           | 100                         | 14.85                   | 98.56                  | 5.93      | -1.44       | 10-1000                      | 3                             | 10                            |
|                                                 | 100                         |                         | 114.8                  | 5.41      | 14.8        |                              |                               |                               |                                                    | 1000                        |                         | 105.1                  | 7.72      | 5.10        |                              |                               |                               |
|                                                 | 1000                        |                         | 107.0                  | 7.01      | 6.96        |                              |                               |                               |                                                    | 10                          |                         | 97.53                  | 8.14      | -2.47       |                              |                               |                               |
|                                                 | 2000                        |                         | 101.0                  | 3.34      | 1.02        |                              |                               |                               |                                                    | 100                         |                         | 104.7                  | 6.56      | 4.64        |                              |                               |                               |
|                                                 | 5000                        |                         | 93.53                  | 4.27      | -6.47       |                              |                               |                               |                                                    | 1000                        |                         | 98.62                  | 3.52      | -1.38       |                              |                               |                               |
| 3-CHLOROAMPHETAMINE (35378-15-5)                | 10                          | 6.85                    | 119.5                  | 5.84      | 19.5        | 10-5000                      | 3                             | 10                            | JWH-080<br>(210179-44-5)                           | 10                          | 14.97                   | 86.50                  | 17.6      | -13.5       | 10-1000                      | 3                             | 10                            |
|                                                 | 100                         |                         | 99.61                  | 13.3      | -0.39       |                              |                               |                               |                                                    | 100                         |                         | 103.9                  | 11.1      | 3.92        |                              |                               |                               |
|                                                 | 1000                        |                         | 109.4                  | 9.80      | 9.36        |                              |                               |                               |                                                    | 1000                        |                         | 111.6                  | 5.78      | 11.6        |                              |                               |                               |
|                                                 | 2000                        |                         | 115.0                  | 6.61      | 15.0        |                              |                               |                               |                                                    | 10                          |                         | 38.22                  | 22.9      | -61.8       |                              |                               |                               |
|                                                 | 5000                        |                         | 104.6                  | 5.17      | 4.62        |                              |                               |                               |                                                    | 100                         |                         | 80.23                  | 16.5      | -19.8       |                              |                               |                               |
| 3-CHLOROMETHCATHINONE (3-CMC)<br>(1607439-32-6) | 100                         | 6.02                    | 119.8                  | 7.58      | 19.8        | 100-5000                     | 30                            | 100                           | JWH-116<br>(619294-64-3)                           | 1000                        | 15.66                   | 116.9                  | 7.78      | 16.9        | 100-1000                     | 30                            | 100                           |
|                                                 | 1000                        |                         | 99.08                  | 6.60      | 0.920       |                              |                               |                               |                                                    | 10                          |                         | 22.42                  | 68.9      | -77.6       |                              |                               |                               |

| Analyte (CAS numer)                               | C<br>(ng mL <sup>-1</sup> ) | t <sub>R</sub><br>(min) | R <sub>av</sub><br>(%) | CV<br>(%) | BIAS<br>(%) | RA<br>(ng mL <sup>-1</sup> ) | LOD<br>(ng mL <sup>-1</sup> ) | LOQ<br>(ng mL <sup>-1</sup> ) | Analyte (CAS numer)      | C<br>(ng mL <sup>-1</sup> ) | t <sub>R</sub><br>(min) | R <sub>av</sub><br>(%) | CV<br>(%) | BIAS<br>(%) | RA<br>(ng mL <sup>-1</sup> ) | LOD<br>(ng mL <sup>-1</sup> ) | LOQ<br>(ng mL <sup>-1</sup> ) |
|---------------------------------------------------|-----------------------------|-------------------------|------------------------|-----------|-------------|------------------------------|-------------------------------|-------------------------------|--------------------------|-----------------------------|-------------------------|------------------------|-----------|-------------|------------------------------|-------------------------------|-------------------------------|
| 3-CHLOROPHENYLPIPERAZINE (mCPP)<br>(13078-15-4)   | 5000                        | 6.83                    | 84.68                  | 10.2      | -15.3       | 100-<br>5000                 | 30                            | 100                           | JWH-146<br>(914458-21-2) | 100                         | 16.21                   | 61.91                  | 13.5      | -38.1       | 10-1000                      | 3                             | 10                            |
|                                                   | 100                         |                         | 115.7                  | 6.40      | 15.7        |                              |                               |                               |                          | 1000                        |                         | 142.1                  | 6.75      | 42.1        |                              |                               |                               |
|                                                   | 1000                        |                         | 106.3                  | 10.9      | 6.31        |                              |                               |                               |                          | 10                          |                         | 83.40                  | 3.93      | -16.6       |                              |                               |                               |
|                                                   | 5000                        |                         | 105.7                  | 4.46      | 5.67        |                              |                               |                               |                          | 100                         |                         | 18.43                  | 32.1      | -81.6       |                              |                               |                               |
| 3C-P (2749897-26-3)                               | 10                          | 8.43                    | 91.34                  | 14.3      | -8.66       | 10-5000                      | 3                             | 10                            | JWH-149<br>(548461-82-1) | 1000                        | 15.65                   | 113.6                  | 8.53      | 13.6        | 10-1000                      | 3                             | 10                            |
|                                                   | 100                         |                         | 108.1                  | 6.63      | 8.11        |                              |                               |                               |                          | 10                          |                         | 100.7                  | 5.44      | 0.650       |                              |                               |                               |
|                                                   | 1000                        |                         | 109.0                  | 3.95      | 8.97        |                              |                               |                               |                          | 100                         |                         | 77.78                  | 14.2      | -22.2       |                              |                               |                               |
|                                                   | 2000                        |                         | 100.2                  | 3.92      | 0.170       |                              |                               |                               |                          | 1000                        |                         | 116.1                  | 5.43      | 16.1        |                              |                               |                               |
| 3-DESOXY-3,4-MDPV (2117405-33-9)                  | 10                          | 8.01                    | 113.8                  | 7.90      | 13.8        | 10-5000                      | 3                             | 10                            | JWH-167<br>(864445-37-4) | 10                          | 14.55                   | 94.05                  | 10.9      | -5.96       | 10-1000                      | 3                             | 10                            |
|                                                   | 100                         |                         | 95.65                  | 6.43      | -4.35       |                              |                               |                               |                          | 100                         |                         | 104.3                  | 4.87      | 4.28        |                              |                               |                               |
|                                                   | 1000                        |                         | 96.94                  | 2.71      | -3.06       |                              |                               |                               |                          | 1000                        |                         | 108.7                  | 1.85      | 8.72        |                              |                               |                               |
|                                                   | 2000                        |                         | 90.36                  | 3.58      | -9.64       |                              |                               |                               |                          | 10                          |                         | 89.06                  | 7.91      | -10.9       |                              |                               |                               |
| 3-ETHYLMETHCATHINONE (3-EMC)<br>(2446466-60-8)    | 5000                        | 7.39                    | 86.85                  | 3.22      | -13.2       | 100-<br>5000                 | 30                            | 100                           | JWH-175<br>(619294-35-8) | 100                         | 16.76                   | 34.86                  | 25.8      | -65.1       | 10-1000                      | 3                             | 10                            |
|                                                   | 100                         |                         | 101.7                  | 8.23      | 1.72        |                              |                               |                               |                          | 100                         |                         | 80.79                  | 5.28      | -19.2       |                              |                               |                               |
|                                                   | 1000                        |                         | 105.8                  | 8.15      | 5.76        |                              |                               |                               |                          | 100                         |                         | 30.80                  | 29.7      | -69.2       |                              |                               |                               |
|                                                   | 5000                        |                         | 82.18                  | 12.7      | -17.8       |                              |                               |                               |                          | 1000                        |                         | 112.2                  | 6.77      | 12.2        |                              |                               |                               |
| 3-FEC (2446466-64-2)                              | 10                          | 4.99                    | 86.14                  | 6.65      | -13.9       | 10-5000                      | 3                             | 10                            | JWH-193<br>(133438-58-1) | 10                          | 11.79                   | 89.68                  | 10.4      | -10.3       | 10-1000                      | 3                             | 10                            |
|                                                   | 100                         |                         | 96.60                  | 7.87      | -3.40       |                              |                               |                               |                          | 100                         |                         | 101.1                  | 6.58      | 1.08        |                              |                               |                               |
|                                                   | 1000                        |                         | 89.43                  | 4.42      | -10.6       |                              |                               |                               |                          | 1000                        |                         | 100.0                  | 4.71      | 0.030       |                              |                               |                               |
|                                                   | 2000                        |                         | 81.25                  | 3.70      | -18.8       |                              |                               |                               |                          | 10                          |                         | 102.9                  | 13.1      | 2.91        |                              |                               |                               |
| 3-FLUORO-ALFA-PPP (1214940-15-4)                  | 5000                        | 5.36                    | 93.63                  | 6.30      | -6.37       | 10-5000                      | 3                             | 10                            | JWH-198<br>(166599-76-4) | 100                         | 11.57                   | 97.6                   | 6.85      | -2.36       | 10-1000                      | 3                             | 10                            |
|                                                   | 10                          |                         | 92.87                  | 12.5      | -7.13       |                              |                               |                               |                          | 1000                        |                         | 103.0                  | 2.93      | 2.99        |                              |                               |                               |
|                                                   | 100                         |                         | 100.0                  | 3.74      | 0.00        |                              |                               |                               |                          | 10                          |                         | 93.40                  | 12.9      | -6.60       |                              |                               |                               |
|                                                   | 1000                        |                         | 82.27                  | 4.26      | -17.7       |                              |                               |                               |                          | 100                         |                         | 110.2                  | 7.23      | 10.2        |                              |                               |                               |
| 3-FLUOROAMPHETAMINE (1716-59-2)                   | 2000                        | 5.13                    | 76.99                  | 4.25      | -23.0       | 100-<br>5000                 | 30                            | 100                           | JWH-201<br>(864445-47-6) | 1000                        | 15.92                   | 114.7                  | 6.19      | 14.7        | -                            | 30                            | -                             |
|                                                   | 5000                        |                         | 82.05                  | 2.61      | -18.0       |                              |                               |                               |                          | 10                          |                         | 33.86                  | 28.8      | -66.2       |                              |                               |                               |
|                                                   | 100                         |                         | 109.9                  | 9.94      | 9.90        |                              |                               |                               |                          | 100                         |                         | 42.39                  | 26.1      | -57.6       |                              |                               |                               |
|                                                   | 1000                        |                         | 105.6                  | 6.00      | 5.58        |                              |                               |                               |                          | 1000                        |                         | 118.5                  | 7.37      | 18.5        |                              |                               |                               |
| 3-FLUOROMETHAMPHETAMINE (3-FMA)<br>(1324717-74-9) | 5000                        | 5.41                    | 94.86                  | 2.73      | -5.14       | 100-<br>5000                 | 30                            | 100                           | JWH-307<br>(914458-26-7) | 10                          | 15.50                   | 84.39                  | 8.15      | -15.6       | 10-1000                      | 3                             | 10                            |
|                                                   | 100                         |                         | 107.9                  | 7.44      | 7.90        |                              |                               |                               |                          | 100                         |                         | 86.54                  | 18.1      | -13.5       |                              |                               |                               |
|                                                   | 1000                        |                         | 118.1                  | 3.75      | 18.1        |                              |                               |                               |                          | 1000                        |                         | 111.4                  | 7.64      | 11.4        |                              |                               |                               |
|                                                   | 5000                        |                         | 103.4                  | 4.09      | 3.40        |                              |                               |                               |                          | 10                          |                         | 36.57                  | 16.6      | -63.4       |                              |                               |                               |
| 3-FLUOROMETHCATHINONE (3-FMC)<br>(246600-40-5)    | 100                         | 4.43                    | 112.3                  | 5.35      | 12.3        | 100-<br>5000                 | 30                            | 100                           | JWH-309<br>(914458-42-7) | 100                         | 16.09                   | 19.85                  | 43.9      | -80.2       | -                            | 30                            | -                             |
|                                                   | 1000                        |                         | 91.06                  | 13.0      | -8.94       |                              |                               |                               |                          | 1000                        |                         | 121.9                  | 8.55      | 21.9        |                              |                               |                               |
|                                                   | 5000                        |                         | 82.11                  | 12.7      | -17.9       |                              |                               |                               |                          | 10                          |                         | 97.28                  | 5.21      | -2.72       |                              |                               |                               |
|                                                   | 100                         |                         | 87.18                  | 2.08      | -12.8       |                              |                               |                               |                          | 100                         |                         | 113.4                  | 4.21      | 13.4        |                              |                               |                               |
| 3-HYDROXYBROMAZEPAM (13132-73-5)                  | 1000                        | 9.19                    | 113.8                  | 8.88      | 13.8        | 100-<br>5000                 | 30                            | 100                           | JWH-368<br>(914458-31-4) | 1000                        | 15.47                   | 117.8                  | 4.35      | 17.8        | 10-1000                      | 3                             | 10                            |

| Analyte (CAS numer)                             | C<br>(ng mL <sup>-1</sup> ) | t <sub>R</sub><br>(min) | R <sub>av</sub><br>(%) | CV<br>(%) | BIAS<br>(%) | RA<br>(ng mL <sup>-1</sup> ) | LOD<br>(ng mL <sup>-1</sup> ) | LOQ<br>(ng mL <sup>-1</sup> ) | Analyte (CAS numer)         | C<br>(ng mL <sup>-1</sup> ) | t <sub>R</sub><br>(min) | R <sub>av</sub><br>(%) | CV<br>(%) | BIAS<br>(%) | RA<br>(ng mL <sup>-1</sup> ) | LOD<br>(ng mL <sup>-1</sup> ) | LOQ<br>(ng mL <sup>-1</sup> ) |     |
|-------------------------------------------------|-----------------------------|-------------------------|------------------------|-----------|-------------|------------------------------|-------------------------------|-------------------------------|-----------------------------|-----------------------------|-------------------------|------------------------|-----------|-------------|------------------------------|-------------------------------|-------------------------------|-----|
| 3-HYDROXYFLUNITRAZEPAM (67739-71-3)             | 5000                        | 10.23                   | 101.3                  | 5.70      | 1.32        | 100-5000                     | 30                            | 100                           | JWH-369<br>(914458-27-8)    | 10                          | 15.69                   | 53.82                  | 16.2      | -46.2       | -                            | 30                            | -                             |     |
|                                                 | 100                         |                         | 96.57                  | 9.55      | -3.43       |                              |                               |                               |                             | 100                         |                         | 43.08                  | 24.9      | -56.9       |                              |                               |                               |     |
|                                                 | 1000                        |                         | 118.1                  | 6.44      | 18.1        |                              |                               |                               |                             | 1000                        |                         | 127.6                  | 8.93      | 27.6        |                              |                               |                               |     |
|                                                 | 5000                        |                         | 83.75                  | 5.10      | -16.3       |                              |                               |                               |                             | 10                          |                         | 99.32                  | 15.3      | -0.680      |                              |                               |                               |     |
| 3-IODOAMPHETAMINE (20110-56-9)                  | 10                          | 8.06                    | 103.2                  | 16.3      | 3.17        | 10-5000                      | 3                             | 10                            | JWH-412<br>(1364933-59-4)   | 100                         | 15.42                   | 91.01                  | 9.42      | -8.99       | 10-1000                      | 3                             | 10                            |     |
|                                                 | 100                         |                         | 104.1                  | 7.50      | 4.14        |                              |                               |                               |                             | 1000                        |                         | 118.7                  | 9.67      | 18.7        |                              |                               |                               |     |
|                                                 | 1000                        |                         | 92.87                  | 9.49      | -7.13       |                              |                               |                               |                             | 10                          |                         | 54.51                  | 20.7      | -45.5       |                              |                               |                               |     |
|                                                 | 2000                        |                         | 101.5                  | 12.5      | 1.48        |                              |                               |                               |                             | 100                         |                         | 95.08                  | 8.83      | -4.92       |                              |                               |                               |     |
|                                                 | 5000                        |                         | 105.0                  | 9.83      | 5.02        |                              |                               |                               |                             | 1000                        |                         | 104.4                  | 4.06      | 4.39        |                              |                               |                               |     |
| 3-MEC (2493976-59-1)                            | 10                          | 6.47                    | 108.0                  | 15.3      | 8.01        | 10-5000                      | 3                             | 10                            | KETAMINE<br>(1867-66-9)     | 100                         | 6.51                    | 107.1                  | 6.48      | 7.09        | 100-5000                     | 30                            | 100                           |     |
|                                                 | 100                         |                         | 95.06                  | 10.8      | -4.94       |                              |                               |                               |                             | 1000                        |                         | 110.5                  | 8.76      | 10.5        |                              |                               |                               |     |
|                                                 | 1000                        |                         | 92.25                  | 5.45      | -7.75       |                              |                               |                               |                             | 5000                        |                         | 100.6                  | 5.34      | 0.640       |                              |                               |                               |     |
|                                                 | 2000                        |                         | 89.73                  | 5.00      | -10.3       |                              |                               |                               |                             | 100                         |                         | 86.25                  | 8.89      | -13.8       |                              |                               |                               |     |
|                                                 | 5000                        |                         | 84.27                  | 2.99      | -15.7       |                              |                               |                               |                             | 1000                        |                         | 100.4                  | 7.46      | 0.350       |                              |                               |                               |     |
| 3-MeOMC (1435933-70-2)                          | 10                          | 5.33                    | 79.96                  | 8.89      | -20.0       | 10-5000                      | 3                             | 10                            | LIDOCAINE<br>(137-58-6)     | 5000                        | 8.31                    | 101.4                  | 7.61      | 1.43        | 100-5000                     | 30                            | 100                           |     |
|                                                 | 100                         |                         | 114.3                  | 4.03      | 14.3        |                              |                               |                               |                             | 100                         |                         | 108.6                  | 5.57      | 8.60        |                              |                               |                               |     |
|                                                 | 1000                        |                         | 72.87                  | 5.13      | -27.1       |                              |                               |                               |                             | 1000                        |                         | 115.8                  | 4.84      | 15.8        |                              |                               |                               |     |
|                                                 | 2000                        |                         | 68.01                  | 5.96      | -32.0       |                              |                               |                               |                             | 5000                        |                         | 108.7                  | 3.88      | 8.67        |                              |                               |                               |     |
|                                                 | 5000                        |                         | 82.38                  | 4.99      | -17.6       |                              |                               |                               |                             | 100                         |                         | 108.6                  | 8.05      | 8.64        |                              |                               |                               |     |
| 3-METHOXYAMPHETAMINE (3-MA)<br>(35294-10-1)     | 100                         | 5.67                    | 117.9                  | 5.04      | 17.9        | 100-5000                     | 30                            | 100                           | LOPRAZOLAM<br>(61197-73-7)  | 1000                        | 9.31                    | 117.9                  | 7.50      | 17.9        | 100-5000                     | 30                            | 100                           |     |
|                                                 | 1000                        |                         | 101.8                  | 15.9      | 1.82        |                              |                               |                               |                             | 5000                        |                         | 105.5                  | 2.94      | 5.45        |                              |                               |                               |     |
|                                                 | 5000                        |                         | 92.49                  | 10.5      | -7.51       |                              |                               |                               |                             | 100                         |                         | 108.6                  | 15.4      | 8.57        |                              |                               |                               |     |
| 3-METHOXYPHENCYCLIDINE (72242-03-6)             | 10                          | 8.93                    | 86.92                  | 11.4      | -13.1       | 10-5000                      | 3                             | 10                            | LORAZEPAM<br>(846-49-1)     | 1000                        | 11.41                   | 108.7                  | 9.60      | 8.73        | 100-5000                     | 30                            | 100                           |     |
|                                                 | 100                         |                         | 102.1                  | 8.62      | 2.06        |                              |                               |                               |                             | 5000                        |                         | 106.4                  | 7.20      | 6.39        |                              |                               |                               |     |
|                                                 | 1000                        |                         | 107.4                  | 4.73      | 7.35        |                              |                               |                               |                             | 100                         |                         | 97.14                  | 4.49      | -2.86       |                              |                               |                               |     |
|                                                 | 2000                        |                         | 101.6                  | 5.82      | 1.59        |                              |                               |                               |                             | 1000                        |                         | 110.9                  | 7.09      | 10.9        |                              |                               |                               |     |
|                                                 | 5000                        |                         | 97.5                   | 3.50      | -2.51       |                              |                               |                               |                             | 5000                        |                         | 97.83                  | 5.90      | -2.17       |                              |                               |                               |     |
| 3-METHYLMETHCATHINONE (3-MMC)<br>(1246816-62-5) | 100                         | 6.01                    | 110.0                  | 5.98      | 10.0        | 100-5000                     | 30                            | 100                           | LSD (50-37-3)               | 100                         | 8.15                    | 97.13                  | 8.78      | -2.87       | 100-5000                     | 30                            | 100                           |     |
|                                                 | 1000                        |                         | 92.52                  | 4.62      | -7.48       |                              |                               |                               |                             | 1000                        |                         | 113.3                  | 5.29      | 13.3        |                              |                               |                               |     |
|                                                 | 5000                        |                         | 86.47                  | 9.80      | -13.5       |                              |                               |                               |                             | 5000                        |                         | 104.9                  | 5.65      | 4.92        |                              |                               |                               |     |
| 3-METHYL-PBP                                    | 10                          | 7.5                     | 97.82                  | 11.3      | -2.18       | 10-5000                      | 3                             | 10                            | MAPROTILINE<br>(10347-81-6) | 1000                        | 10.76                   | 114.6                  | 7.17      | 14.6        | 100-5000                     | 30                            | 100                           |     |
|                                                 | 100                         |                         | 103.9                  | 8.19      | 3.93        |                              |                               |                               |                             | 5000                        |                         | 99.88                  | 4.23      | -0.120      |                              |                               |                               |     |
|                                                 | 1000                        |                         | 108.0                  | 9.64      | 8.04        |                              |                               |                               |                             | 100                         |                         | 104.9                  | 5.24      | 4.88        |                              |                               |                               |     |
|                                                 | 2000                        |                         | 90.23                  | 6.73      | -9.77       |                              |                               |                               |                             | 1000                        |                         | 108.6                  | 5.32      | 8.60        |                              |                               |                               |     |
| 3-METHYL-PPP (2749302-38-1)                     | 5000                        | 6.67                    | 103.0                  | 7.06      | 2.95        | 10-5000                      | 3                             | 10                            | MBDB (128767-12-4)          | 5000                        | 6.47                    | 94.17                  | 1.87      | -5.83       | 100-5000                     | 30                            | 100                           |     |
|                                                 | 10                          |                         | 97.23                  | 13.5      | -2.77       |                              |                               |                               |                             | 10                          |                         | 5.44                   | 366.9     | 23.7        |                              |                               |                               | 266 |
|                                                 | 100                         |                         | 99.72                  | 8.91      | 0.280       |                              |                               |                               |                             | 10                          |                         | 5.44                   | 366.9     | 23.7        |                              |                               |                               | 266 |
|                                                 |                             |                         |                        |           |             |                              |                               |                               | MDAT (101625-35-8)          | 10                          | 5.44                    | 366.9                  | 23.7      | 266         | 100-5000                     | 30                            | 100                           |     |

| Analyte (CAS numer)                 | C<br>(ng mL <sup>-1</sup> ) | t <sub>R</sub><br>(min) | R <sub>av</sub><br>(%) | CV<br>(%) | BIAS<br>(%) | RA<br>(ng mL <sup>-1</sup> ) | LOD<br>(ng mL <sup>-1</sup> ) | LOQ<br>(ng mL <sup>-1</sup> ) | Analyte (CAS numer)          | C<br>(ng mL <sup>-1</sup> ) | t <sub>R</sub><br>(min) | R <sub>av</sub><br>(%) | CV<br>(%) | BIAS<br>(%) | RA<br>(ng mL <sup>-1</sup> ) | LOD<br>(ng mL <sup>-1</sup> ) | LOQ<br>(ng mL <sup>-1</sup> ) |
|-------------------------------------|-----------------------------|-------------------------|------------------------|-----------|-------------|------------------------------|-------------------------------|-------------------------------|------------------------------|-----------------------------|-------------------------|------------------------|-----------|-------------|------------------------------|-------------------------------|-------------------------------|
|                                     | 1000                        |                         | 70.20                  | 8.62      | -29.8       |                              |                               |                               |                              | 100                         |                         | 106.8                  | 9.63      | 6.75        |                              |                               |                               |
|                                     | 2000                        |                         | 102.7                  | 5.53      | 2.72        |                              |                               |                               |                              | 1000                        |                         | 83.80                  | 1.56      | -16.2       |                              |                               |                               |
|                                     | 5000                        |                         | 106.5                  | 4.12      | 6.49        |                              |                               |                               |                              | 2000                        |                         | 82.65                  | 5.71      | -17.4       |                              |                               |                               |
| 4,4'-DMAR (1445569-01-6)            | 100                         | 7.38                    | 103.6                  | 4.23      | 3.64        | 100-5000                     | 30                            | 100                           |                              | 5000                        |                         | 82.55                  | 3.36      | -17.5       |                              |                               |                               |
|                                     | 1000                        |                         | 101.1                  | 2.90      | 1.11        |                              |                               |                               |                              | 10                          |                         | 235.6                  | 1.07      | 135         |                              |                               |                               |
|                                     | 5000                        |                         | 91.24                  | 1.77      | -8.76       |                              |                               |                               |                              | 100                         |                         | 118.0                  | 4.04      | 18.0        |                              |                               |                               |
| 4-AcO-DET (1135424-15-5)            | 10                          | 6.38                    | 103.4                  | 14.6      | 3.43        | 10-5000                      | 3                             | 10                            | MDBP (38063-96-6)            | 1000                        | 2.47                    | 32.62                  | 1.62      | -67.4       | -                            | 30                            | -                             |
|                                     | 100                         |                         | 108.5                  | 5.96      | 8.47        |                              |                               |                               |                              | 2000                        |                         | 28.77                  | 2.76      | -71.2       |                              |                               |                               |
|                                     | 1000                        |                         | 101.7                  | 3.19      | 1.65        |                              |                               |                               |                              | 5000                        |                         | 30.34                  | 3.45      | -69.7       |                              |                               |                               |
|                                     | 2000                        |                         | 95.17                  | 2.67      | -4.83       |                              |                               |                               |                              | 100                         |                         | 112.9                  | 5.34      | 12.9        |                              |                               |                               |
|                                     | 5000                        |                         | 90.87                  | 4.76      | -9.13       |                              |                               |                               |                              | 1000                        |                         | 110.9                  | 4.39      | 10.9        |                              |                               |                               |
| 4-AcO-DMT (2748484-99-1)            | 10                          | 5.47                    | 112.6                  | 4.06      | 12.6        | 10-5000                      | 3                             | 10                            | MDEA (82801-81-8)            | 5000                        | 5.90                    | 103.2                  | 4.07      | 3.21        | 100-5000                     | 30                            | 100                           |
|                                     | 100                         |                         | 115.2                  | 5.46      | 15.2        |                              |                               |                               |                              | 10                          |                         | 89.91                  | 12.9      | -10.1       |                              |                               |                               |
|                                     | 1000                        |                         | 96.14                  | 2.46      | -3.86       |                              |                               |                               |                              | 100                         |                         | 99.40                  | 14.8      | -0.600      |                              |                               |                               |
|                                     | 2000                        |                         | 86.08                  | 2.79      | -13.9       |                              |                               |                               |                              | 1000                        |                         | 112.1                  | 2.25      | 12.1        |                              |                               |                               |
|                                     | 5000                        |                         | 93.51                  | 4.88      | -6.49       |                              |                               |                               |                              | 100                         |                         | 93.75                  | 12.6      | -6.25       |                              |                               |                               |
| 4-AcO-MET (2748591-02-6)            | 100                         | 6.07                    | 102.4                  | 12.2      | 2.41        | 100-5000                     | 30                            | 100                           | MDPBP (784985-33-7)          | 1000                        | 6.47                    | 111.5                  | 7.66      | 11.5        | 100-5000                     | 30                            | 100                           |
|                                     | 1000                        |                         | 81.85                  | 6.60      | -18.2       |                              |                               |                               |                              | 5000                        |                         | 115.7                  | 3.01      | 15.7        |                              |                               |                               |
|                                     | 5000                        |                         | 103.1                  | 2.60      | 3.12        |                              |                               |                               |                              | 10                          |                         | 89.89                  | 18.1      | -10.1       |                              |                               |                               |
| 4-APB (286834-82-0)                 | 10                          | 6.71                    | 94.37                  | 13.2      | -5.63       | 10-5000                      | 3                             | 10                            | MECLONAZEPAM (58662-84-3)    | 100                         | 11.41                   | 105.2                  | 3.79      | 5.24        | 10-5000                      | 3                             | 10                            |
|                                     | 100                         |                         | 94.44                  | 6.01      | -5.56       |                              |                               |                               |                              | 1000                        |                         | 112.9                  | 2.39      | 12.9        |                              |                               |                               |
|                                     | 1000                        |                         | 97.26                  | 6.31      | -2.74       |                              |                               |                               |                              | 2000                        |                         | 100.3                  | 5.01      | 0.32        |                              |                               |                               |
|                                     | 2000                        |                         | 89.83                  | 4.58      | -10.2       |                              |                               |                               |                              | 5000                        |                         | 96.55                  | 6.62      | -3.45       |                              |                               |                               |
|                                     | 5000                        |                         | 94.72                  | 4.31      | -5.28       |                              |                               |                               |                              | 100                         |                         | 88.78                  | 7.08      | -11.2       |                              |                               |                               |
| 4-APDB (1203342-42-0)               | 10                          | 5.58                    | 103.0                  | 14.0      | 3.02        | 10-5000                      | 3                             | 10                            | MEDAZEPAM (2898-12-6)        | 1000                        | 9.48                    | 95.69                  | 2.10      | -4.31       | 100-5000                     | 30                            | 100                           |
|                                     | 100                         |                         | 110.1                  | 12.5      | 10.1        |                              |                               |                               |                              | 5000                        |                         | 117.4                  | 4.46      | 17.4        |                              |                               |                               |
|                                     | 1000                        |                         | 86.62                  | 8.52      | -13.4       |                              |                               |                               |                              | 10                          |                         | 97.19                  | 13.4      | -2.82       |                              |                               |                               |
|                                     | 2000                        |                         | 88.65                  | 7.11      | -11.4       |                              |                               |                               |                              | 100                         |                         | 90.15                  | 9.52      | -9.85       |                              |                               |                               |
|                                     | 5000                        |                         | 85.16                  | 5.31      | -14.8       |                              |                               |                               |                              | 1000                        |                         | 98.26                  | 5.81      | -1.74       |                              |                               |                               |
| 4-BROMO-2,5-DMMA (155638-80-5)      | 100                         | 8.39                    | 116.5                  | 3.66      | 16.5        | 100-5000                     | 30                            | 100                           | MEMANITINE (41100-52-1)      | 2000                        | 9.10                    | 91.27                  | 6.07      | -8.73       | 10-5000                      | 3                             | 10                            |
|                                     | 1000                        |                         | 108.7                  | 3.08      | 8.66        |                              |                               |                               |                              | 5000                        |                         | 88.67                  | 5.49      | -11.3       |                              |                               |                               |
|                                     | 5000                        |                         | 86.23                  | 2.67      | -13.8       |                              |                               |                               |                              | 10                          |                         | 87.02                  | 14.1      | -13.0       |                              |                               |                               |
| 4-BROMOAMPHETAMINE (58400-88-7)     | 100                         | 7.47                    | 109.7                  | 10.9      | 9.70        | 100-5000                     | 30                            | 100                           | MEPERIDINE (50-13-5)         | 100                         | 7.52                    | 108.2                  | 7.26      | 8.18        | 10-5000                      | 3                             | 10                            |
|                                     | 1000                        |                         | 81.86                  | 4.41      | -18.1       |                              |                               |                               |                              | 1000                        |                         | 112.4                  | 3.43      | 12.4        |                              |                               |                               |
|                                     | 5000                        |                         | 104.5                  | 17.3      | 4.54        |                              |                               |                               |                              | 2000                        |                         | 100.3                  | 4.75      | 0.280       |                              |                               |                               |
| 4-BROMOMETHAMPHETAMINE (30651-67-3) | 100                         | 7.43                    | 104.3                  | 6.05      | 4.26        | 100-5000                     | 30                            | 100                           | MEPHTETRAMINE (2749302-69-8) | 5000                        | 5.44                    | 97.69                  | 3.14      | -2.31       | 100-5000                     | 30                            | 100                           |
|                                     | 1000                        |                         | 102.5                  | 17.1      | 2.48        |                              |                               |                               |                              | 100                         |                         | 100.1                  | 3.76      | 0.060       |                              |                               |                               |
|                                     | 5000                        |                         | 106.0                  | 9.92      | 5.99        |                              |                               |                               |                              | 1000                        |                         | 109.7                  | 4.08      | 9.74        |                              |                               |                               |



| Analyte (CAS numer)                                | C<br>(ng mL <sup>-1</sup> ) | t <sub>R</sub><br>(min) | R <sub>av</sub><br>(%) | CV<br>(%) | BIAS<br>(%) | RA<br>(ng mL <sup>-1</sup> ) | LOD<br>(ng mL <sup>-1</sup> ) | LOQ<br>(ng mL <sup>-1</sup> ) | Analyte (CAS numer)              | C<br>(ng mL <sup>-1</sup> ) | t <sub>R</sub><br>(min) | R <sub>av</sub><br>(%) | CV<br>(%) | BIAS<br>(%) | RA<br>(ng mL <sup>-1</sup> ) | LOD<br>(ng mL <sup>-1</sup> ) | LOQ<br>(ng mL <sup>-1</sup> ) |
|----------------------------------------------------|-----------------------------|-------------------------|------------------------|-----------|-------------|------------------------------|-------------------------------|-------------------------------|----------------------------------|-----------------------------|-------------------------|------------------------|-----------|-------------|------------------------------|-------------------------------|-------------------------------|
| 4-BROMOMETHCATHINONE<br>(BREFEDRONE) (135333-27-6) | 100                         | 6.69                    | 104.1                  | 6.50      | 4.13        | 100-<br>5000                 | 30                            | 100                           | MEPIRAPIM<br>(2365542-30-7)      | 5000                        | 10.14                   | 106.2                  | 5.00      | 6.22        | 10-1000                      | 3                             | 10                            |
|                                                    | 1000                        |                         | 95.19                  | 10.8      | -4.81       |                              |                               |                               |                                  | 10                          |                         | 118.4                  | 4.87      | 18.4        |                              |                               |                               |
|                                                    | 5000                        |                         | 86.23                  | 14.7      | -13.8       |                              |                               |                               |                                  | 100                         |                         | 102.6                  | 6.10      | 2.64        |                              |                               |                               |
| 4-CAB (23292-08-2)                                 | 10                          | 8.00                    | 104.4                  | 13.9      | 4.44        | 10-5000                      | 3                             | 10                            | MEPROBAMATE<br>(57-53-4)         | 1000                        | 8.82                    | 98.27                  | 3.39      | -1.73       | 100-<br>5000                 | 30                            | 100                           |
|                                                    | 100                         |                         | 102.3                  | 6.50      | 2.31        |                              |                               |                               |                                  | 100                         |                         | 90.89                  | 14.0      | -9.11       |                              |                               |                               |
|                                                    | 1000                        |                         | 99.06                  | 10.7      | -0.94       |                              |                               |                               |                                  | 1000                        |                         | 93.27                  | 4.21      | -6.73       |                              |                               |                               |
|                                                    | 2000                        |                         | 96.78                  | 4.61      | -3.22       |                              |                               |                               |                                  | 5000                        |                         | 81.96                  | 6.49      | -18.0       |                              |                               |                               |
|                                                    | 5000                        |                         | 87.43                  | 6.65      | -12.6       |                              |                               |                               |                                  | 100                         |                         | 109.9                  | 12.7      | 9.90        |                              |                               |                               |
| 4-CEC (22198-75-0)                                 | 10                          | 6.70                    | 99.15                  | 14.5      | -0.85       | 10-5000                      | 3                             | 10                            | MESCALINE<br>(832-92-8)          | 1000                        | 5.23                    | 93.67                  | 13.4      | -6.33       | 100-<br>5000                 | 30                            | 100                           |
|                                                    | 100                         |                         | 93.48                  | 5.09      | -6.52       |                              |                               |                               |                                  | 5000                        |                         | 86.42                  | 4.13      | -13.6       |                              |                               |                               |
|                                                    | 1000                        |                         | 96.03                  | 5.65      | -3.97       |                              |                               |                               |                                  | 100                         |                         | 113.0                  | 7.73      | 13.0        |                              |                               |                               |
|                                                    | 2000                        |                         | 87.53                  | 8.44      | -12.5       |                              |                               |                               |                                  | 1000                        |                         | 114.4                  | 8.94      | 14.4        |                              |                               |                               |
|                                                    | 5000                        |                         | 82.41                  | 3.18      | -17.6       |                              |                               |                               |                                  | 5000                        |                         | 93.47                  | 2.99      | -6.53       |                              |                               |                               |
| 4-CHLORO-ALPHA-PPP (28117-79-5)                    | 10                          | 6.88                    | 92.23                  | 15.5      | -7.77       | 10-5000                      | 3                             | 10                            | METHAMPHETAMINE (826-10-<br>8)   | 100                         | 5.05                    | 96.62                  | 7.15      | -3.38       | 100-<br>5000                 | 30                            | 100                           |
|                                                    | 100                         |                         | 95.54                  | 11.3      | -4.46       |                              |                               |                               |                                  | 1000                        |                         | 96.92                  | 4.22      | -3.08       |                              |                               |                               |
|                                                    | 1000                        |                         | 93.13                  | 7.65      | -6.87       |                              |                               |                               |                                  | 5000                        |                         | 97.65                  | 4.70      | -2.35       |                              |                               |                               |
|                                                    | 2000                        |                         | 90.29                  | 6.88      | -9.71       |                              |                               |                               |                                  | 100                         |                         | 107.0                  | 5.14      | 7.02        |                              |                               |                               |
|                                                    | 5000                        |                         | 88.56                  | 3.21      | -11.4       |                              |                               |                               |                                  | 1000                        |                         | 115.1                  | 1.87      | 15.1        |                              |                               |                               |
| 4-CHLORO-ALPHA-PVP (5881-77-6)                     | 10                          | 8.95                    | 64.80                  | 23.3      | -35.2       | 100-<br>5000                 | 30                            | 100                           | METHANDIENONE<br>(72-63-9)       | 5000                        | 12.51                   | 99.18                  | 5.28      | -0.820      | 100-<br>5000                 | 30                            | 100                           |
|                                                    | 100                         |                         | 98.42                  | 7.78      | -1.58       |                              |                               |                               |                                  | 100                         |                         | 115.6                  | 3.76      | 15.6        |                              |                               |                               |
|                                                    | 1000                        |                         | 107.2                  | 4.10      | 7.24        |                              |                               |                               |                                  | 1000                        |                         | 105.6                  | 5.75      | 5.60        |                              |                               |                               |
|                                                    | 2000                        |                         | 94.27                  | 5.81      | -5.73       |                              |                               |                               |                                  | 5000                        |                         | 90.48                  | 7.08      | -9.52       |                              |                               |                               |
|                                                    | 5000                        |                         | 88.45                  | 3.31      | -11.6       |                              |                               |                               |                                  | 100                         |                         | 117.1                  | 6.16      | 17.1        |                              |                               |                               |
| 4-CHLOROAMPHETAMINE (3706-38-5)                    | 10                          | 6.96                    | 116.0                  | 5.69      | 16.0        | 10-100                       | 3                             | 10                            | METHCATHINONE<br>(49656-78-2)    | 1000                        | 4.13                    | 89.73                  | 4.92      | -10.3       | 100-<br>5000                 | 30                            | 100                           |
|                                                    | 100                         |                         | 101.8                  | 10.1      | 1.82        |                              |                               |                               |                                  | 5000                        |                         | 86.50                  | 5.66      | -13.5       |                              |                               |                               |
|                                                    | 1000                        |                         | 42.47                  | 10.6      | -57.5       |                              |                               |                               |                                  | 10                          |                         | 89.91                  | 10.8      | -10.1       |                              |                               |                               |
|                                                    | 2000                        |                         | 59.08                  | 16.7      | -40.9       |                              |                               |                               |                                  | 100                         |                         | 98.38                  | 6.55      | -1.62       |                              |                               |                               |
|                                                    | 5000                        |                         | 44.83                  | 25.6      | -55.2       |                              |                               |                               |                                  | 1000                        |                         | 57.10                  | 5.38      | -42.9       |                              |                               |                               |
| 4-CHLOROMETHCATHINONE (4-CMC)<br>(2319878-22-1)    | 100                         | 6.21                    | 108.3                  | 6.23      | 8.34        | 100-<br>5000                 | 30                            | 100                           | METHEDRONE<br>(879665-92-6)      | 2000                        | 5.33                    | 52.33                  | 6.00      | -47.7       | 10-100                       | 30.5                          | 10                            |
|                                                    | 1000                        |                         | 93.42                  | 15.1      | -6.58       |                              |                               |                               |                                  | 5000                        |                         | 61.27                  | 3.22      | -38.7       |                              |                               |                               |
|                                                    | 5000                        |                         | 96.25                  | 9.43      | -3.75       |                              |                               |                               |                                  | 100                         |                         | 109.1                  | 10.4      | 9.05        |                              |                               |                               |
| 4-CMA (30572-91-9)                                 | 10                          | 7.07                    | 117.9                  | 9.87      | 17.9        | 10-5000                      | 3                             | 10                            | METHOHEXITAL<br>(151-83-7)       | 1000                        | 11.79                   | 114.0                  | 7.52      | 14.0        | 100-<br>5000                 | 30                            | 100                           |
|                                                    | 100                         |                         | 103.5                  | 10.3      | 3.46        |                              |                               |                               |                                  | 5000                        |                         | 98.58                  | 6.15      | -1.42       |                              |                               |                               |
|                                                    | 1000                        |                         | 87.75                  | 9.48      | -12.3       |                              |                               |                               |                                  | 100                         |                         | 101.3                  | 5.85      | 1.25        |                              |                               |                               |
|                                                    | 2000                        |                         | 85.68                  | 6.65      | -14.3       |                              |                               |                               |                                  | 1000                        |                         | 104.7                  | 12.9      | 4.73        |                              |                               |                               |
|                                                    | 5000                        |                         | 87.71                  | 7.33      | -12.3       |                              |                               |                               |                                  | 5000                        |                         | 109.9                  | 3.52      | 9.89        |                              |                               |                               |
| 4-EAPB (2514946-32-6)                              | 10                          | 7.36                    | 85.96                  | 17.2      | -14.1       | 10-5000                      | 3                             | 10                            | METHOXPHENIDINE<br>2055777-48-3) | 100                         | 9.36                    | 97.64                  | 10.8      | -2.36       | 100-<br>5000                 | 30                            | 100                           |
| 100                                                | 115.6                       |                         | 6.95                   | 15.6      | 1000        |                              |                               |                               |                                  | 110.8                       |                         | 8.34                   | 10.8      |             |                              |                               |                               |

| Analyte (CAS numer)                | C<br>(ng mL <sup>-1</sup> ) | t <sub>R</sub><br>(min) | R <sub>av</sub><br>(%) | CV<br>(%) | BIAS<br>(%) | RA<br>(ng mL <sup>-1</sup> ) | LOD<br>(ng mL <sup>-1</sup> ) | LOQ<br>(ng mL <sup>-1</sup> ) | Analyte (CAS numer)              | C<br>(ng mL <sup>-1</sup> ) | t <sub>R</sub><br>(min) | R <sub>av</sub><br>(%) | CV<br>(%) | BIAS<br>(%) | RA<br>(ng mL <sup>-1</sup> ) | LOD<br>(ng mL <sup>-1</sup> ) | LOQ<br>(ng mL <sup>-1</sup> ) |
|------------------------------------|-----------------------------|-------------------------|------------------------|-----------|-------------|------------------------------|-------------------------------|-------------------------------|----------------------------------|-----------------------------|-------------------------|------------------------|-----------|-------------|------------------------------|-------------------------------|-------------------------------|
| 4-ETHYL-N,N-DMC (2702382-98-5)     | 1000                        | 7.52                    | 96.37                  | 7.15      | -3.63       | 10-5000                      | 3                             | 10                            | METHYLHEXANAMINE<br>(13803-74-2) | 5000                        | 5.76                    | 106.8                  | 2.44      | 6.84        | 100-5000                     | 30                            | 100                           |
|                                    | 2000                        |                         | 98.24                  | 9.50      | -1.76       |                              |                               |                               |                                  | 100                         |                         | 103.6                  | 9.79      | 3.55        |                              |                               |                               |
|                                    | 5000                        |                         | 92.52                  | 11.1      | -7.48       |                              |                               |                               |                                  | 1000                        |                         | 94.33                  | 9.11      | -5.67       |                              |                               |                               |
|                                    | 10                          |                         | 82.63                  | 2.64      | -17.4       |                              |                               |                               |                                  | 5000                        |                         | 103.2                  | 11.6      | 3.15        |                              |                               |                               |
|                                    | 100                         |                         | 98.92                  | 3.92      | -1.08       |                              |                               |                               |                                  | 100                         |                         | 101.5                  | 9.11      | 1.53        |                              |                               |                               |
| 4-FEC (2705473-25-0)               | 1000                        | 5.01                    | 99.31                  | 10.5      | -0.69       | 10-5000                      | 3                             | 10                            | METHYLONE<br>(186028-80-8)       | 1000                        | 4.68                    | 85.14                  | 4.93      | -14.9       | 100-5000                     | 30                            | 100                           |
|                                    | 2000                        |                         | 95.98                  | 9.81      | -4.02       |                              |                               |                               |                                  | 5000                        |                         | 81.90                  | 4.40      | -18.1       |                              |                               |                               |
|                                    | 5000                        |                         | 91.28                  | 11.7      | -8.72       |                              |                               |                               |                                  | 100                         |                         | 114.7                  | 7.21      | 14.7        |                              |                               |                               |
|                                    | 10                          |                         | 91.33                  | 10.6      | -8.67       |                              |                               |                               |                                  | 1000                        |                         | 119.8                  | 5.38      | 19.8        |                              |                               |                               |
|                                    | 100                         |                         | 103.2                  | 7.07      | 3.22        |                              |                               |                               |                                  | 5000                        |                         | 107.4                  | 5.16      | 7.39        |                              |                               |                               |
| 4-FLUORO BUPHEDRONE (2624137-27-3) | 1000                        | 5.77                    | 82.28                  | 11.8      | -17.7       | 10-5000                      | 3                             | 10                            | METHYLPHENIDATE<br>(113-45-1)    | 100                         | 7.17                    | 117.0                  | 7.55      | 17.0        | 100-5000                     | 30                            | 100                           |
|                                    | 2000                        |                         | 84.46                  | 5.26      | -15.5       |                              |                               |                               |                                  | 100                         |                         | 105.7                  | 12.7      | 5.69        |                              |                               |                               |
|                                    | 5000                        |                         | 94.91                  | 3.30      | -5.09       |                              |                               |                               |                                  | 1000                        |                         | 100.9                  | 4.06      | 0.890       |                              |                               |                               |
|                                    | 10                          |                         | 99.36                  | 7.52      | -0.64       |                              |                               |                               |                                  | 2000                        |                         | 92.12                  | 3.78      | -7.88       |                              |                               |                               |
|                                    | 100                         |                         | 91.83                  | 5.58      | -8.17       |                              |                               |                               |                                  | 5000                        |                         | 92.90                  | 3.72      | -7.10       |                              |                               |                               |
| 4-FLUORO PENTEDRONE (2469350-88-5) | 1000                        | 7.2                     | 110.0                  | 13.1      | 10.0        | 10-5000                      | 3                             | 10                            | MIANSERIN<br>(24219-97-4)        | 100                         | 9.35                    | 107.7                  | 6.60      | 7.65        | 100-5000                     | 30                            | 100                           |
|                                    | 2000                        |                         | 92.34                  | 8.35      | -7.66       |                              |                               |                               |                                  | 1000                        |                         | 119.9                  | 3.99      | 19.9        |                              |                               |                               |
|                                    | 5000                        |                         | 99.45                  | 10.2      | -0.55       |                              |                               |                               |                                  | 5000                        |                         | 93.77                  | 7.83      | -6.23       |                              |                               |                               |
|                                    | 10                          |                         | 105.7                  | 12.9      | 5.68        |                              |                               |                               |                                  | 100                         |                         | 97.70                  | 4.36      | -2.30       |                              |                               |                               |
|                                    | 100                         |                         | 101.0                  | 11.2      | 0.98        |                              |                               |                               |                                  | 1000                        |                         | 118.5                  | 4.13      | 18.5        |                              |                               |                               |
| 4-FLUORO PV8 (2748485-01-8)        | 1000                        | 10.01                   | 94.61                  | 5.15      | -5.39       | 10-5000                      | 3                             | 10                            | MIDAZOLAM<br>(59467-70-8)        | 5000                        | 9.41                    | 106.1                  | 4.95      | 6.05        | 100-5000                     | 30                            | 100                           |
|                                    | 2000                        |                         | 88.64                  | 4.10      | -11.4       |                              |                               |                               |                                  | 100                         |                         | 104.0                  | 6.63      | 3.95        |                              |                               |                               |
|                                    | 5000                        |                         | 83.87                  | 5.48      | -16.1       |                              |                               |                               |                                  | 1000                        |                         | 111.3                  | 2.12      | 11.3        |                              |                               |                               |
|                                    | 10                          |                         | 84.02                  | 7.43      | -16.0       |                              |                               |                               |                                  | 5000                        |                         | 106.7                  | 3.05      | 6.68        |                              |                               |                               |
|                                    | 100                         |                         | 104.6                  | 5.18      | 4.64        |                              |                               |                               |                                  | 100                         |                         | 105.5                  | 9.12      | 5.52        |                              |                               |                               |
| 4-FLUORO PV9 (2117405-40-8)        | 1000                        | 11.04                   | 102.5                  | 4.77      | 2.51        | 10-5000                      | 3                             | 10                            | MITRAGYNINE<br>(4098-40-2)       | 1000                        | 6.81                    | 99.16                  | 14.4      | -0.840      | 10-5000                      | 3                             | 10                            |
|                                    | 2000                        |                         | 98.38                  | 6.92      | -1.62       |                              |                               |                               |                                  | 1000                        |                         | 103.8                  | 7.81      | 3.77        |                              |                               |                               |
|                                    | 5000                        |                         | 89.36                  | 4.09      | -10.6       |                              |                               |                               |                                  | 2000                        |                         | 82.76                  | 4.58      | -17.2       |                              |                               |                               |
|                                    | 10                          |                         | 106.4                  | 7.24      | 6.39        |                              |                               |                               |                                  | 5000                        |                         | 81.63                  | 8.75      | -18.4       |                              |                               |                               |
|                                    | 100                         |                         | 114.8                  | 5.33      | 14.8        |                              |                               |                               |                                  | 100                         |                         | 111.4                  | 3.57      | 11.4        |                              |                               |                               |
| 4-FLUORO-ALFA-PPP (274859-18-1)    | 1000                        | 5.35                    | 117.0                  | 2.17      | 17.0        | 10-5000                      | 3                             | 10                            | MMB018<br>(1971007-97-2)         | 100                         | 14.15                   | 95.36                  | 6.98      | -4.64       | 10-1000                      | 3                             | 10                            |
|                                    | 2000                        |                         | 97.31                  | 3.83      | -2.69       |                              |                               |                               |                                  | 1000                        |                         | 89.82                  | 7.95      | -10.2       |                              |                               |                               |
|                                    | 5000                        |                         | 88.24                  | 3.06      | -11.8       |                              |                               |                               |                                  | 100                         |                         | 93.11                  | 9.13      | -6.89       |                              |                               |                               |
|                                    | 10                          |                         | 86.69                  | 6.02      | -13.3       |                              |                               |                               |                                  | 100                         |                         | 105.4                  | 12.1      | 5.42        |                              |                               |                               |
|                                    | 100                         |                         | 100.9                  | 9.69      | 0.860       |                              |                               |                               |                                  | 1000                        |                         | 106.3                  | 3.40      | 6.33        |                              |                               |                               |
| 4-FLUORO-ALFA-PPP (274859-18-1)    | 1000                        | 5.35                    | 83.58                  | 3.27      | -16.4       | 10-5000                      | 3                             | 10                            | MMB2201<br>(1971007-87-0)        | 10                          | 13.10                   | 113.1                  | 15.8      | 13.1        | 10-1000                      | 3                             | 10                            |
|                                    | 2000                        |                         | 74.96                  | 4.51      | -25.0       |                              |                               |                               |                                  | 100                         |                         | 106.3                  | 3.40      | 6.33        |                              |                               |                               |
|                                    | 5000                        |                         | 81.21                  | 2.90      | -18.8       |                              |                               |                               |                                  | 100                         |                         | 113.1                  | 15.8      | 13.1        |                              |                               |                               |
|                                    |                             |                         |                        |           |             |                              |                               |                               | MN-25 (501926-82-5)              | 1000                        | 12.48                   | 83.67                  | 8.94      | -16.3       | 10-1000                      | 3                             | 10                            |
|                                    |                             |                         |                        |           |             |                              |                               |                               |                                  | 1000                        |                         | 109.6                  | 4.25      | 9.56        |                              |                               |                               |

| Analyte (CAS numer)                             | C<br>(ng mL <sup>-1</sup> ) | t <sub>R</sub><br>(min) | R <sub>av</sub><br>(%) | CV<br>(%) | BIAS<br>(%) | RA<br>(ng mL <sup>-1</sup> ) | LOD<br>(ng mL <sup>-1</sup> ) | LOQ<br>(ng mL <sup>-1</sup> ) | Analyte (CAS numer)                             | C<br>(ng mL <sup>-1</sup> ) | t <sub>R</sub><br>(min) | R <sub>av</sub><br>(%) | CV<br>(%) | BIAS<br>(%) | RA<br>(ng mL <sup>-1</sup> ) | LOD<br>(ng mL <sup>-1</sup> ) | LOQ<br>(ng mL <sup>-1</sup> ) |
|-------------------------------------------------|-----------------------------|-------------------------|------------------------|-----------|-------------|------------------------------|-------------------------------|-------------------------------|-------------------------------------------------|-----------------------------|-------------------------|------------------------|-----------|-------------|------------------------------|-------------------------------|-------------------------------|
| 4-FLUOROMETHAMPHETAMINE (4-FMA)<br>(52063-62-4) | 100                         | 5.4                     | 88.42                  | 7.82      | -11.6       | 100-<br>5000                 | 30                            | 100                           | MN-25-2-METHYL<br>DERIVATIVE (501927-29-3)      | 10                          | 13.22                   | 98.36                  | 9.04      | -1.64       | 10-1000                      | 3                             | 10                            |
|                                                 | 1000                        |                         | 87.35                  | 8.46      | -12.7       |                              |                               |                               |                                                 | 100                         |                         | 102.7                  | 4.34      | 2.67        |                              |                               |                               |
|                                                 | 5000                        |                         | 85.14                  | 8.60      | -14.9       |                              |                               |                               |                                                 | 1000                        |                         | 97.76                  | 8.97      | -2.24       |                              |                               |                               |
| 4-FLUOROMETHCATHINONE (4-FMC)<br>(7589-35-7)    | 100                         | 4.44                    | 106.6                  | 4.93      | 6.59        | 100-<br>5000                 | 30                            | 100                           | MO-CHMINACA<br>(2365471-04-9)                   | 10                          | 15.47                   | 89.41                  | 12.4      | -10.6       | 10-1000                      | 3                             | 10                            |
|                                                 | 1000                        |                         | 89.85                  | 8.14      | -10.2       |                              |                               |                               |                                                 | 100                         |                         | 84.67                  | 18.7      | -15.3       |                              |                               |                               |
|                                                 | 5000                        |                         | 93.23                  | 4.22      | -6.77       |                              |                               |                               |                                                 | 1000                        |                         | 112.5                  | 5.71      | 12.5        |                              |                               |                               |
| 4F-PVP (850352-31-7)                            | 100                         | 7.66                    | 101.4                  | 7.04      | 1.37        | 100-<br>5000                 | 30                            | 100                           | MORPHINE (57-27-2)                              | 100                         | 2.45                    | 110.1                  | 10.8      | 10.1        | 100-<br>5000                 | 30                            | 100                           |
|                                                 | 1000                        |                         | 101.9                  | 5.81      | 1.87        |                              |                               |                               |                                                 | 1000                        |                         | 101.7                  | 4.07      | 1.68        |                              |                               |                               |
|                                                 | 5000                        |                         | 97.76                  | 3.90      | -2.24       |                              |                               |                               |                                                 | 5000                        |                         | 96.63                  | 5.04      | -3.37       |                              |                               |                               |
| 4-HYDROXY DiPT (63065-90-7)                     | 100                         | 6.47                    | 103.5                  | 4.40      | 3.53        | 100-<br>5000                 | 30                            | 100                           | MPBP (1214-15-9)                                | 100                         | 7.59                    | 105.1                  | 5.89      | 5.14        | 100-<br>5000                 | 30                            | 100                           |
|                                                 | 1000                        |                         | 109.0                  | 5.43      | 9.00        |                              |                               |                               |                                                 | 1000                        |                         | 107.4                  | 4.33      | 7.37        |                              |                               |                               |
|                                                 | 5000                        |                         | 105.1                  | 2.28      | 5.12        |                              |                               |                               |                                                 | 5000                        |                         | 104.6                  | 4.17      | 4.64        |                              |                               |                               |
| 4-HYDROXYMIDAZOLAM (59468-85-8)                 | 100                         | 8.89                    | 55.98                  | 25.2      | -44.0       | -                            | 30                            | -                             | MT-45 (57314-55-3)                              | 100                         | 10.85                   | 95.07                  | 8.37      | -4.93       | 100-<br>5000                 | 30                            | 100                           |
|                                                 | 1000                        |                         | 129.5                  | 5.42      | 29.5        |                              |                               |                               |                                                 | 1000                        |                         | 113.4                  | 7.91      | 13.4        |                              |                               |                               |
|                                                 | 5000                        |                         | 87.53                  | 3.53      | -12.5       |                              |                               |                               |                                                 | 5000                        |                         | 107.6                  | 2.53      | 7.62        |                              |                               |                               |
| 4-IODOAMPHETAMINE (21894-58-6)                  | 10                          | 8.22                    | 107.6                  | 11.2      | 7.56        | 10-5000                      | 3                             | 10                            | N-(3-<br>METHYLBENZYL)PIPERAZINE<br>(5321-48-2) | 10                          | 4.00                    | 223.7                  | 4.10      | 123         | -                            | 3                             | -                             |
|                                                 | 100                         |                         | 95.27                  | 8.13      | -4.73       |                              |                               |                               |                                                 | 100                         |                         | 116.1                  | 3.88      | 16.1        |                              |                               |                               |
|                                                 | 1000                        |                         | 87.22                  | 6.97      | -12.8       |                              |                               |                               |                                                 | 1000                        |                         | 48.74                  | 3.32      | -51.3       |                              |                               |                               |
|                                                 | 2000                        |                         | 81.48                  | 4.85      | -18.5       |                              |                               |                               |                                                 | 2000                        |                         | 45.49                  | 3.31      | -54.5       |                              |                               |                               |
|                                                 | 5000                        |                         | 93.73                  | 13.9      | -6.27       |                              |                               |                               |                                                 | 5000                        |                         | 51.24                  | 3.85      | -48.8       |                              |                               |                               |
| 4-MAPB                                          | 10                          | 6.86                    | 95.76                  | 10.1      | -4.24       | 10-5000                      | 3                             | 10                            | N,N-<br>DIETHYLPHENETHYLAMINE(<br>5300-21-0)    | 10                          | 5.37                    | 89.59                  | 10.4      | -10.4       | 10-5000                      | 3                             | 10                            |
|                                                 | 100                         |                         | 95.34                  | 6.45      | -4.66       |                              |                               |                               |                                                 | 100                         |                         | 95.05                  | 7.54      | -4.95       |                              |                               |                               |
|                                                 | 1000                        |                         | 64.45                  | 3.51      | -35.6       |                              |                               |                               |                                                 | 1000                        |                         | 100.8                  | 8.44      | 0.790       |                              |                               |                               |
|                                                 | 2000                        |                         | 96.66                  | 10.7      | -3.34       |                              |                               |                               |                                                 | 2000                        |                         | 94.01                  | 1.87      | -5.99       |                              |                               |                               |
|                                                 | 5000                        |                         | 97.48                  | 8.12      | -2.52       |                              |                               |                               |                                                 | 5000                        |                         | 94.99                  | 3.58      | -5.01       |                              |                               |                               |
| 4-MEAP (18297-05-7)                             | 10                          | 8.57                    | 116.4                  | 6.20      | 16.4        | 10-5000                      | 3                             | 10                            | N,N-DIMETHYLPENTYLONE<br>(17763-13-2)           | 100                         | 7.31                    | 109.7                  | 7.05      | 9.69        | 100-<br>5000                 | 30                            | 100                           |
|                                                 | 100                         |                         | 107.0                  | 6.84      | 7.02        |                              |                               |                               |                                                 | 1000                        |                         | 110.2                  | 6.77      | 10.2        |                              |                               |                               |
|                                                 | 1000                        |                         | 96.00                  | 15.0      | -4.00       |                              |                               |                               |                                                 | 5000                        |                         | 110.7                  | 5.99      | 10.7        |                              |                               |                               |
|                                                 | 2000                        |                         | 91.08                  | 15.7      | -8.92       |                              |                               |                               |                                                 | 100                         |                         | 89.92                  | 18.7      | -10.1       |                              |                               |                               |
|                                                 | 5000                        |                         | 96.31                  | 1.55      | -3.69       |                              |                               |                               |                                                 | 1000                        |                         | 98.92                  | 5.61      | -1.08       |                              |                               |                               |
| 4-MEO-ALPHA-PVP (5537-19-9)                     | 10                          | 8.04                    | 112.4                  | 5.23      | 12.4        | 10-5000                      | 3                             | 10                            | N,N-DMT (61-50-7)                               | 5000                        | 9.24                    | 94.41                  | 2.72      | -5.59       | 10-5000                      | 3                             | 10                            |
|                                                 | 100                         |                         | 97.44                  | 8.69      | -2.56       |                              |                               |                               |                                                 | 10                          |                         | 88.45                  | 14.1      | -11.6       |                              |                               |                               |
|                                                 | 1000                        |                         | 99.82                  | 3.25      | -0.18       |                              |                               |                               |                                                 | 100                         |                         | 112.2                  | 5.13      | 12.2        |                              |                               |                               |
|                                                 | 2000                        |                         | 93.33                  | 5.21      | -6.67       |                              |                               |                               |                                                 | 1000                        |                         | 110.8                  | 4.36      | 10.8        |                              |                               |                               |
|                                                 | 5000                        |                         | -                      | -         | -           |                              |                               |                               |                                                 | 2000                        |                         | 101.7                  | 3.16      | 1.70        |                              |                               |                               |
| 4-MeOPBP (2749897-35-4)                         | 10                          | 6.93                    | 102.9                  | 12.1      | 2.89        | 10-5000                      | 3                             | 10                            | NAPHYRONE (850352-11-3)                         | 5000                        | 10.08                   | 93.77                  | 3.47      | -6.23       | 10-5000                      | 3                             | 10                            |
|                                                 | 100                         |                         | 96.16                  | 8.29      | -3.84       |                              |                               |                               |                                                 | 10                          |                         | 97.24                  | 9.74      | -2.76       |                              |                               |                               |

| Analyte (CAS numer)                                 | C<br>(ng mL <sup>-1</sup> ) | t <sub>R</sub><br>(min) | R <sub>av</sub><br>(%) | CV<br>(%) | BIAS<br>(%) | RA<br>(ng mL <sup>-1</sup> ) | LOD<br>(ng mL <sup>-1</sup> ) | LOQ<br>(ng mL <sup>-1</sup> ) | Analyte (CAS numer)                       | C<br>(ng mL <sup>-1</sup> ) | t <sub>R</sub><br>(min) | R <sub>av</sub><br>(%) | CV<br>(%) | BIAS<br>(%) | RA<br>(ng mL <sup>-1</sup> ) | LOD<br>(ng mL <sup>-1</sup> ) | LOQ<br>(ng mL <sup>-1</sup> ) |
|-----------------------------------------------------|-----------------------------|-------------------------|------------------------|-----------|-------------|------------------------------|-------------------------------|-------------------------------|-------------------------------------------|-----------------------------|-------------------------|------------------------|-----------|-------------|------------------------------|-------------------------------|-------------------------------|
|                                                     | 1000                        |                         | 89.59                  | 7.30      | -10.4       |                              |                               |                               |                                           | 100                         |                         | 108.4                  | 1.60      | 8.36        |                              |                               |                               |
|                                                     | 2000                        |                         | 81.63                  | 2.40      | -18.4       |                              |                               |                               |                                           | 1000                        |                         | 111.0                  | 4.69      | 11.0        |                              |                               |                               |
|                                                     | 5000                        |                         | 82.95                  | 4.12      | -17.1       |                              |                               |                               |                                           | 2000                        |                         | 100.1                  | 3.46      | 0.06        |                              |                               |                               |
| 4-METHOXY PHENCYCLIDINE (2185-93-5)                 | 10                          | 8.93                    | 82.18                  | 13.6      | -17.8       | 10-5000                      | 3                             | 10                            | NAPHYRONE-1-NAPHTYL ISOMER (1349245-31-3) | 5000                        | 9.61                    | 91.33                  | 4.72      | -8.67       | 10-5000                      | 3                             | 10                            |
|                                                     | 100                         |                         | 107.5                  | 5.04      | 7.51        |                              |                               |                               |                                           | 10                          |                         | 101.6                  | 18.5      | 1.56        |                              |                               |                               |
|                                                     | 1000                        |                         | 113.9                  | 3.94      | 13.9        |                              |                               |                               |                                           | 100                         |                         | 111.7                  | 5.24      | 11.7        |                              |                               |                               |
|                                                     | 2000                        |                         | 104.4                  | 4.55      | 4.42        |                              |                               |                               |                                           | 1000                        |                         | 113.3                  | 2.96      | 13.3        |                              |                               |                               |
|                                                     | 5000                        |                         | 101.2                  | 3.10      | 1.24        |                              |                               |                               |                                           | 2000                        |                         | 108.5                  | 3.26      | 8.51        |                              |                               |                               |
| 4-METHOXY PV8 (2749302-60-9)                        | 10                          | 10.19                   | 88.91                  | 7.39      | -11.1       | 10-5000                      | 3                             | 10                            | N-BENZYL NORBUTYLONE (1823865-05-9)       | 5000                        | 8.71                    | 98.14                  | 3.88      | -1.86       | 10-5000                      | 3                             | 10                            |
|                                                     | 100                         |                         | 109.4                  | 5.15      | 9.44        |                              |                               |                               |                                           | 10                          |                         | 90.25                  | 9.38      | -9.75       |                              |                               |                               |
|                                                     | 1000                        |                         | 111.3                  | 4.60      | 11.3        |                              |                               |                               |                                           | 100                         |                         | 111.5                  | 7.15      | 11.5        |                              |                               |                               |
|                                                     | 2000                        |                         | 100.1                  | 3.28      | 0.050       |                              |                               |                               |                                           | 1000                        |                         | 118.4                  | 1.15      | 18.4        |                              |                               |                               |
|                                                     | 5000                        |                         | 90.84                  | 5.61      | -9.16       |                              |                               |                               |                                           | 2000                        |                         | 111.2                  | 5.23      | 11.2        |                              |                               |                               |
| 4-METHOXY PV9 (2748590-60-3)                        | 10                          | 11.13                   | 84.42                  | 8.29      | -15.6       | 10-5000                      | 3                             | 10                            | N-ETHYL-4-METHOXYAMPHETAMINE (93963-24-7) | 5000                        | 6.12                    | 101.3                  | 3.28      | 1.34        | 10-5000                      | 3                             | 10                            |
|                                                     | 100                         |                         | 113.5                  | 6.57      | 13.48       |                              |                               |                               |                                           | 10                          |                         | 91.97                  | 6.65      | -8.03       |                              |                               |                               |
|                                                     | 1000                        |                         | 118.2                  | 3.76      | 18.2        |                              |                               |                               |                                           | 100                         |                         | 93.07                  | 11.2      | -6.93       |                              |                               |                               |
|                                                     | 2000                        |                         | 110.3                  | 3.83      | 10.3        |                              |                               |                               |                                           | 1000                        |                         | 89.23                  | 4.39      | -10.8       |                              |                               |                               |
|                                                     | 5000                        |                         | 93.56                  | 4.25      | -6.44       |                              |                               |                               |                                           | 2000                        |                         | 85.26                  | 7.41      | -14.7       |                              |                               |                               |
| 4-METHOXYMETHAMPHETAMINE (PMMA) (3398-68-3)         | 100                         | 5.69                    | 105.2                  | 8.15      | 5.15        | 100-5000                     | 30                            | 100                           | N-ETHYLBUPHEDRONE (2731709-73-0)          | 5000                        | 5.82                    | 83.10                  | 3.00      | -16.9       | 10-5000                      | 3                             | 10                            |
|                                                     | 1000                        |                         | 105.3                  | 10.2      | 5.31        |                              |                               |                               |                                           | 100                         |                         | 96.75                  | 16.5      | -3.25       |                              |                               |                               |
|                                                     | 5000                        |                         | 98.61                  | 4.33      | -1.39       |                              |                               |                               |                                           | 1000                        |                         | 102.3                  | 7.11      | 2.31        |                              |                               |                               |
| 4-METHYL PENTEDRONE (1373918-61-6)                  | 10                          | 8.30                    | 81.31                  | 13.5      | -18.7       | 10-5000                      | 3                             | 10                            | N-ETHYL-N-METHYLCATHINONE (1157739-24-6)  | 1000                        | 4.91                    | 89.15                  | 3.20      | -10.9       | 10-5000                      | 3                             | 10                            |
|                                                     | 100                         |                         | 93.27                  | 6.74      | -6.73       |                              |                               |                               |                                           | 2000                        |                         | 85.77                  | 5.07      | -14.2       |                              |                               |                               |
|                                                     | 1000                        |                         | 100.8                  | 2.14      | 0.810       |                              |                               |                               |                                           | 5000                        |                         | 87.75                  | 5.41      | -12.3       |                              |                               |                               |
|                                                     | 2000                        |                         | 92.22                  | 5.99      | -7.78       |                              |                               |                               |                                           | 10                          |                         | 109.3                  | 10.7      | 9.28        |                              |                               |                               |
|                                                     | 5000                        |                         | 86.51                  | 4.54      | -13.5       |                              |                               |                               |                                           | 100                         |                         | 111.2                  | 6.84      | 11.2        |                              |                               |                               |
| 4-METHYL-ALPHA-ETHYLAMINO BUTIOPHENONE (18268-19-4) | 10                          | 7.44                    | 101.7                  | 9.53      | 1.73        | 10-5000                      | 3                             | 10                            | N-ETHYLNORDAZEPAM (5571-65-3)             | 1000                        | 12.89                   | 83.73                  | 2.85      | -16.3       | 100-5000                     | 30                            | 100                           |
|                                                     | 100                         |                         | 95.36                  | 6.20      | -4.64       |                              |                               |                               |                                           | 1000                        |                         | 100.5                  | 7.60      | 0.520       |                              |                               |                               |
|                                                     | 1000                        |                         | 98.74                  | 10.6      | -1.26       |                              |                               |                               |                                           | 2000                        |                         | 117.7                  | 3.58      | 17.70       |                              |                               |                               |
|                                                     | 2000                        |                         | 104.1                  | 13.5      | 4.11        |                              |                               |                               |                                           | 5000                        |                         | 108.0                  | 3.04      | 8.04        |                              |                               |                               |
|                                                     | 5000                        |                         | 90.86                  | 7.49      | -9.14       |                              |                               |                               |                                           | 10                          |                         | 97.71                  | 10.8      | -2.30       |                              |                               |                               |
| 4-METHYLAMPHETAMINE (41632-56-8)                    | 10                          | 6.71                    | 100.6                  | 11.5      | 0.600       | 10-5000                      | 3                             | 10                            | N-ETHYLNORKETAMINE (2525095-53-6)         | 100                         | 7.13                    | 95.86                  | 8.04      | -4.14       | 10-5000                      | 3                             | 10                            |
|                                                     | 100                         |                         | 95.14                  | 12.3      | -4.86       |                              |                               |                               |                                           | 1000                        |                         | 92.66                  | 4.43      | -7.34       |                              |                               |                               |
|                                                     | 1000                        |                         | 90.43                  | 3.92      | -9.57       |                              |                               |                               |                                           | 2000                        |                         | 87.21                  | 3.34      | -12.8       |                              |                               |                               |
|                                                     | 2000                        |                         | 84.95                  | 2.26      | -15.1       |                              |                               |                               |                                           | 5000                        |                         | 87.03                  | 7.71      | -13.0       |                              |                               |                               |
|                                                     | 5000                        |                         | 83.88                  | 5.76      | -16.1       |                              |                               |                               |                                           | 100                         |                         | 87.03                  | 7.71      | -13.0       |                              |                               |                               |
| 4-METHYLCATHINONE (31952-47-3)                      | 100                         | 5.71                    | 118.0                  | 5.02      | 18.0        | 100-5000                     | 30                            | 100                           | N-ETHYLOXAZEPAM                           | 100                         | 12.25                   | 94.36                  | 6.73      | -5.64       | 100-                         | 30                            | 100                           |
|                                                     | 1000                        |                         | 86.12                  | 5.84      | -13.9       |                              |                               |                               |                                           |                             |                         |                        |           |             |                              |                               |                               |

| Analyte (CAS numer)                                 | C<br>(ng mL <sup>-1</sup> ) | t <sub>R</sub><br>(min) | R <sub>av</sub><br>(%) | CV<br>(%) | BIAS<br>(%) | RA<br>(ng mL <sup>-1</sup> ) | LOD<br>(ng mL <sup>-1</sup> ) | LOQ<br>(ng mL <sup>-1</sup> ) | Analyte (CAS numer)              | C<br>(ng mL <sup>-1</sup> ) | t <sub>R</sub><br>(min) | R <sub>av</sub><br>(%) | CV<br>(%) | BIAS<br>(%) | RA<br>(ng mL <sup>-1</sup> ) | LOD<br>(ng mL <sup>-1</sup> ) | LOQ<br>(ng mL <sup>-1</sup> ) |
|-----------------------------------------------------|-----------------------------|-------------------------|------------------------|-----------|-------------|------------------------------|-------------------------------|-------------------------------|----------------------------------|-----------------------------|-------------------------|------------------------|-----------|-------------|------------------------------|-------------------------------|-------------------------------|
| 4-METHYLMETHAMPHETAMINE (4-MMA)<br>(161697-16-1)    | 5000                        | 6.88                    | 107.5                  | 5.08      | 7.50        | 100-<br>5000                 | 30                            | 100                           | (62659-64-7)                     | 1000                        | 7.51                    | 116.6                  | 3.10      | 16.6        | 100-<br>5000                 | 30                            | 100                           |
|                                                     | 100                         |                         | 80.08                  | 6.56      | -19.9       |                              |                               |                               | 5000                             | 112.0                       |                         | 5.74                   | 11.99     |             |                              |                               |                               |
|                                                     | 1000                        |                         | 91.70                  | 5.75      | -8.30       |                              |                               |                               | 1000                             | 108.6                       |                         | 1.62                   | 8.63      |             |                              |                               |                               |
|                                                     | 5000                        |                         | 106.3                  | 4.35      | 6.31        |                              |                               |                               | 5000                             | 115.0                       |                         | 5.24                   | 15.0      |             |                              |                               |                               |
| 4-METHYLMETHCATHINONE (4-MMC)<br>(1189726-22-4)     | 100                         | 6.01                    | 116.9                  | 6.36      | 16.9        | 100-<br>5000                 | 30                            | 100                           | N-ETHYLPENTYLONE<br>(17763-02-9) | 1000                        | 10.98                   | 103.5                  | 4.59      | 3.47        | 100-<br>5000                 | 30                            | 100                           |
|                                                     | 1000                        |                         | 87.08                  | 8.18      | -12.9       |                              |                               |                               | 100                              | 97.18                       |                         | 4.12                   | -2.82     |             |                              |                               |                               |
|                                                     | 5000                        |                         | 81.26                  | 12.4      | -18.7       |                              |                               |                               | 1000                             | 114.5                       |                         | 6.83                   | 14.5      |             |                              |                               |                               |
| 4-METHYL-N,N-DMC (1448845-14-4)                     | 10                          | 6.04                    | 92.86                  | 10.4      | -7.14       | 10-5000                      | 3                             | 10                            | NIMETAZEPAM (2011-67-8)          | 5000                        | 8.02                    | 105.6                  | 4.08      | 5.56        | 100-<br>5000                 | 30                            | 100                           |
|                                                     | 100                         |                         | 91.79                  | 5.29      | -8.21       |                              |                               |                               | 100                              | 107.8                       |                         | 10.6                   | 7.81      |             |                              |                               |                               |
|                                                     | 1000                        |                         | 96.57                  | 4.14      | -3.43       |                              |                               |                               | 1000                             | 115.5                       |                         | 7.67                   | 15.5      |             |                              |                               |                               |
|                                                     | 2000                        |                         | 90.86                  | 4.56      | -9.14       |                              |                               |                               | 5000                             | 103.9                       |                         | 8.91                   | 3.88      |             |                              |                               |                               |
|                                                     | 5000                        |                         | 91.95                  | 5.04      | -8.05       |                              |                               |                               | 100                              | 82.78                       |                         | 9.40                   | -17.2     |             |                              |                               |                               |
| 4-METHYL-N-METHYLBUPHEDRONE<br>(2748589-93-5)       | 10                          | 7.10                    | 91.67                  | 10.9      | -8.33       | 10-5000                      | 3                             | 10                            | NITRAZEPAM<br>(146-22-5)         | 1000                        | 10.62                   | 117.7                  | 3.47      | 17.69       | 100-<br>5000                 | 30                            | 100                           |
|                                                     | 100                         |                         | 93.65                  | 3.61      | -6.35       |                              |                               |                               | 5000                             | 106.2                       |                         | 2.21                   | 6.20      |             |                              |                               |                               |
|                                                     | 1000                        |                         | 97.15                  | 6.77      | -2.85       |                              |                               |                               | 10                               | 86.30                       |                         | 12.8                   | -13.7     |             |                              |                               |                               |
|                                                     | 2000                        |                         | 95.79                  | 5.36      | -4.21       |                              |                               |                               | 100                              | 104.9                       |                         | 3.85                   | 4.87      |             |                              |                               |                               |
|                                                     | 5000                        |                         | 101.6                  | 15.9      | 1.63        |                              |                               |                               | 1000                             | 118.7                       |                         | 4.29                   | 18.7      |             |                              |                               |                               |
| 4-METHYL-N-METHYLHEXANOPHENONE<br>(2168553-84-0)    | 10                          | 9.43                    | 91.56                  | 17.1      | -8.44       | 10-5000                      | 3                             | 10                            | N-METHYL-2AI<br>(10408-85-2)     | 100                         | 4.29                    | 96.01                  | 6.23      | -3.99       | 100-<br>5000                 | 30                            | 100                           |
|                                                     | 100                         |                         | 104.6                  | 6.54      | 4.63        |                              |                               |                               | 1000                             | 85.59                       |                         | 4.67                   | -14.4     |             |                              |                               |                               |
|                                                     | 1000                        |                         | 103.2                  | 3.35      | 3.22        |                              |                               |                               | 5000                             | 83.10                       |                         | 3.52                   | -16.9     |             |                              |                               |                               |
|                                                     | 2000                        |                         | 97.18                  | 3.57      | -2.82       |                              |                               |                               | 10                               | 115.3                       |                         | 1.90                   | 15.3      |             |                              |                               |                               |
|                                                     | 5000                        |                         | 94.72                  | 2.93      | -5.28       |                              |                               |                               | 100                              | 106.7                       |                         | 4.61                   | 6.65      |             |                              |                               |                               |
| 4-METHYL-PBP (1214-15-9)                            | 10                          | 7.50                    | 98.56                  | 11.1      | -1.44       | 10-5000                      | 3                             | 10                            | N-METHYL-PEA<br>(589-08-2)       | 1000                        | 3.73                    | 42.25                  | 1.61      | -57.8       | 10-100                       | 3                             | 10                            |
|                                                     | 100                         |                         | 100.2                  | 7.58      | 0.200       |                              |                               |                               | 2000                             | 39.30                       |                         | 1.51                   | -60.7     |             |                              |                               |                               |
|                                                     | 1000                        |                         | 113.7                  | 4.52      | 13.7        |                              |                               |                               | 5000                             | 43.90                       |                         | 3.25                   | -56.1     |             |                              |                               |                               |
|                                                     | 2000                        |                         | 118.5                  | 3.17      | 18.5        |                              |                               |                               | 100                              | 110.8                       |                         | 5.30                   | 10.75     |             |                              |                               |                               |
|                                                     | 5000                        |                         | 113.8                  | 4.23      | 13.8        |                              |                               |                               | 1000                             | 111.5                       |                         | 9.32                   | 11.5      |             |                              |                               |                               |
| 4-METHYL-PHP (1391052-36-0)                         | 10                          | 9.63                    | 87.47                  | 5.23      | -12.5       | 10-5000                      | 3                             | 10                            | N-METHYLTRYPTAMINE<br>(61-49-4)  | 5000                        | 4.82                    | 97.58                  | 4.78      | -2.42       | 100-<br>5000                 | 30                            | 100                           |
|                                                     | 100                         |                         | 100.7                  | 7.57      | 0.73        |                              |                               |                               | 10                               | 90.72                       |                         | 8.50                   | -9.28     |             |                              |                               |                               |
|                                                     | 1000                        |                         | 111.2                  | 4.72      | 11.2        |                              |                               |                               | 100                              | 97.27                       |                         | 4.83                   | -2.73     |             |                              |                               |                               |
|                                                     | 2000                        |                         | 100.0                  | 2.02      | 0.000       |                              |                               |                               | 1000                             | 103.2                       |                         | 7.04                   | 3.23      |             |                              |                               |                               |
|                                                     | 5000                        |                         | 94.53                  | 1.89      | -5.47       |                              |                               |                               | 2000                             | 92.02                       |                         | 8.87                   | -7.98     |             |                              |                               |                               |
| 4-METHYL- $\alpha$ -ETHYLTRYPTAMINE<br>(28289-30-7) | 100                         | 8.41                    | 80.88                  | 9.22      | -19.1       | 100-<br>5000                 | 30                            | 100                           | NN-DMC (10105-90-5)              | 5000                        | 4.32                    | 108.3                  | 8.47      | 8.28        | 10-5000                      | 3                             | 10                            |
|                                                     | 1000                        |                         | 119.9                  | 3.86      | 19.9        |                              |                               |                               | 100                              | 104.0                       |                         | 7.88                   | 4.00      |             |                              |                               |                               |
|                                                     | 5000                        |                         | 112.1                  | 4.67      | 12.1        |                              |                               |                               | 1000                             | 109.4                       |                         | 2.10                   | 9.35      |             |                              |                               |                               |
| 5-APB (286834-80-8)                                 | 100                         | 7.03                    | 105.0                  | 9.03      | 5.00        | 100-<br>5000                 | 30                            | 100                           | NORCLOBAZAM (22316-55-8)         | 5000                        | 10.72                   | 100.4                  | 4.51      | 0.360       | 100-<br>5000                 | 30                            | 100                           |
|                                                     | 1000                        |                         | 103.8                  | 5.47      | 3.80        |                              |                               |                               | 100                              | 110.6                       |                         | 4.95                   | 10.6      |             |                              |                               |                               |
|                                                     | 5000                        |                         | 89.13                  | 2.68      | -10.9       |                              |                               |                               | 1000                             | 115.5                       |                         | 2.37                   | 15.5      |             |                              |                               |                               |

| Analyte (CAS numer)                           | C<br>(ng mL <sup>-1</sup> ) | t <sub>R</sub><br>(min) | R <sub>av</sub><br>(%) | CV<br>(%) | BIAS<br>(%) | RA<br>(ng mL <sup>-1</sup> ) | LOD<br>(ng mL <sup>-1</sup> ) | LOQ<br>(ng mL <sup>-1</sup> ) | Analyte (CAS numer)              | C<br>(ng mL <sup>-1</sup> ) | t <sub>R</sub><br>(min) | R <sub>av</sub><br>(%) | CV<br>(%) | BIAS<br>(%) | RA<br>(ng mL <sup>-1</sup> ) | LOD<br>(ng mL <sup>-1</sup> ) | LOQ<br>(ng mL <sup>-1</sup> ) |
|-----------------------------------------------|-----------------------------|-------------------------|------------------------|-----------|-------------|------------------------------|-------------------------------|-------------------------------|----------------------------------|-----------------------------|-------------------------|------------------------|-----------|-------------|------------------------------|-------------------------------|-------------------------------|
| 5-APDB (152623-94-4)                          | 100                         | 5.66                    | 115.0                  | 10.4      | 15.0        | 100-5000                     | 30                            | 100                           | NORKETAMINE (79499-59-5)         | 5000                        | 6.45                    | 100.4                  | 6.55      | 0.350       | 100-5000                     | 30                            | 100                           |
|                                               | 1000                        |                         | 83.30                  | 1.86      | -16.7       |                              |                               |                               |                                  | 100                         |                         | 109.2                  | 11.0      | 9.21        |                              |                               |                               |
|                                               | 5000                        |                         | 105.9                  | 10.1      | 5.94        |                              |                               |                               |                                  | 5000                        |                         | 106.5                  | 8.36      | 6.49        |                              |                               |                               |
| 5-APDI (152623-95-5)                          | 10                          | 8.73                    | 89.59                  | 10.2      | -10.4       | 10-5000                      | 3                             | 10                            | NORTRIPTYLINE (894-71-3)         | 100                         | 11.06                   | 117.4                  | 5.49      | 17.4        | 100-5000                     | 30                            | 100                           |
|                                               | 100                         |                         | 82.50                  | 4.80      | -17.5       |                              |                               |                               |                                  | 1000                        |                         | 114.8                  | 6.10      | 14.8        |                              |                               |                               |
|                                               | 1000                        |                         | 115.5                  | 3.19      | 15.5        |                              |                               |                               |                                  | 5000                        |                         | 109.0                  | 4.11      | 9.00        |                              |                               |                               |
|                                               | 2000                        |                         | 105.4                  | 3.38      | 5.44        |                              |                               |                               |                                  | 100                         |                         | 105.7                  | 6.06      | 5.67        |                              |                               |                               |
|                                               | 5000                        |                         | 104.3                  | 2.94      | 4.29        |                              |                               |                               |                                  | 1000                        |                         | 111.5                  | 3.22      | 11.5        |                              |                               |                               |
| 5-CHLORO AB-PINACA (1801552-02-2)             | 10                          | 13.00                   | 107.8                  | 13.7      | 7.75        | 10-1000                      | 3                             | 10                            | N-PROPYLAMPHETAMINE (59877-57-5) | 100                         | 6.69                    | 105.7                  | 6.06      | 5.67        | 100-5000                     | 30                            | 100                           |
|                                               | 100                         |                         | 97.11                  | 3.75      | -2.89       |                              |                               |                               |                                  | 1000                        |                         | 111.5                  | 3.22      | 11.5        |                              |                               |                               |
|                                               | 1000                        |                         | 101.6                  | 4.77      | 1.64        |                              |                               |                               |                                  | 5000                        |                         | 109.6                  | 5.73      | 9.62        |                              |                               |                               |
| 5-CHLORO-NNEI (1800101-23-8)                  | 10                          | 14.09                   | 84.78                  | 12.5      | -15.2       | 10-1000                      | 3                             | 10                            | NRG-3 (2701928-05-2)             | 100                         | 9.84                    | 108.8                  | 9.16      | 8.82        | 10-5000                      | 3                             | 10                            |
|                                               | 100                         |                         | 107.1                  | 8.70      | 7.12        |                              |                               |                               |                                  | 1000                        |                         | 113.4                  | 2.74      | 13.4        |                              |                               |                               |
|                                               | 1000                        |                         | 108.7                  | 6.67      | 8.74        |                              |                               |                               |                                  | 2000                        |                         | 106.5                  | 3.00      | 6.53        |                              |                               |                               |
| 5-EAPB (1823776-22-2)                         | 100                         | 7.20                    | 103.0                  | 8.32      | 2.96        | 100-5000                     | 30                            | 100                           | o-CPP (41202-32-8)               | 10                          | 6.80                    | 147.2                  | 9.29      | 47.2        | 1000-5000                    | 30                            | 1000                          |
|                                               | 1000                        |                         | 108.4                  | 11.1      | 8.36        |                              |                               |                               |                                  | 100                         |                         | 101.2                  | 10.5      | 1.23        |                              |                               |                               |
|                                               | 5000                        |                         | 106.7                  | 3.84      | 6.71        |                              |                               |                               |                                  | 1000                        |                         | 91.15                  | 4.65      | -8.85       |                              |                               |                               |
| 5F-ABICA (1801338-26-0)                       | 10                          | 12.12                   | 81.39                  | 18.5      | -18.6       | 10-1000                      | 3                             | 10                            | OCTACAINE (93940-32-0)           | 1000                        | 6.11                    | 96.44                  | 2.79      | -3.56       | 10-5000                      | 3                             | 10                            |
|                                               | 100                         |                         | 95.68                  | 7.08      | -4.32       |                              |                               |                               |                                  | 2000                        |                         | 83.26                  | 4.14      | -16.7       |                              |                               |                               |
|                                               | 1000                        |                         | 95.99                  | 7.75      | -4.01       |                              |                               |                               |                                  | 5000                        |                         | 82.68                  | 2.48      | -17.3       |                              |                               |                               |
| 5-F-JWH-018 ADAMANTYL ANALOG (1364933-62-9)   | 10                          | 15.31                   | 84.84                  | 5.55      | -15.2       | 10-1000                      | 3                             | 10                            | ORG-28611 (784138-08-5)          | 10                          | 11.56                   | 82.98                  | 2.21      | -17.0       | 10-1000                      | 3                             | 10                            |
|                                               | 100                         |                         | 102.5                  | 5.09      | 2.51        |                              |                               |                               |                                  | 100                         |                         | 96.47                  | 11.4      | -3.53       |                              |                               |                               |
|                                               | 1000                        |                         | 113.2                  | 3.36      | 13.2        |                              |                               |                               |                                  | 1000                        |                         | 96.44                  | 2.79      | -3.56       |                              |                               |                               |
| 5-FLUORO THJ (2180934-72-7)                   | 10                          | 15.13                   | 98.77                  | 17.6      | -1.23       | 10-1000                      | 3                             | 10                            | OXAZEPAM (604-75-1)              | 2000                        | 11.37                   | 93.11                  | 3.31      | -6.89       | 100-5000                     | 30                            | 100                           |
|                                               | 100                         |                         | 94.72                  | 10.6      | -5.28       |                              |                               |                               |                                  | 100                         |                         | 119.3                  | 6.07      | 19.3        |                              |                               |                               |
|                                               | 1000                        |                         | 102.5                  | 6.61      | 2.45        |                              |                               |                               |                                  | 1000                        |                         | 92.44                  | 5.14      | -7.56       |                              |                               |                               |
| 5-FLUORO-2-ADB-PINACA ISOMER 2 (2365471-68-5) | 10                          | 12.30                   | 88.09                  | 10.3      | -11.9       | 10-1000                      | 3                             | 10                            | OXYMORPHONE (76-41-5)            | 100                         | 2.65                    | 147.7                  | 72.9      | 47.7        | -                            | 30                            | -                             |
|                                               | 100                         |                         | 103.3                  | 6.06      | 3.32        |                              |                               |                               |                                  | 1000                        |                         | 94.24                  | 7.29      | -5.76       |                              |                               |                               |
|                                               | 1000                        |                         | 113.2                  | 4.19      | 13.2        |                              |                               |                               |                                  | 2000                        |                         | 33.48                  | 45.9      | -66.5       |                              |                               |                               |
| 5-FLUORO-CUMYL-PICA (1400742-18-8)            | 10                          | 13.78                   | 88.29                  | 10.3      | -11.7       | 10-1000                      | 3                             | 10                            | PARACETAMOL (103-90-2)           | 10                          | 3.93                    | 5.65                   | 169       | -94.4       | 100-5000                     | 30                            | 100                           |
|                                               | 100                         |                         | 106.1                  | 7.51      | 6.06        |                              |                               |                               |                                  | 100                         |                         | 117.9                  | 3.72      | 17.9        |                              |                               |                               |
|                                               | 1000                        |                         | 106.9                  | 6.54      | 6.85        |                              |                               |                               |                                  | 5000                        |                         | 101.3                  | 6.80      | 1.31        |                              |                               |                               |
| 5-FLUORO-SDB-006 (1776086-02-2)               | 10                          | 13.05                   | 95.74                  | 13.20     | -4.26       | 10-1000                      | 3                             | 10                            | PARACETAMOL (103-90-2)           | 100                         | 3.93                    | 87.76                  | 9.13      | -12.2       | 100-5000                     | 30                            | 100                           |
|                                               | 100                         |                         | 96.52                  | 3.92      | -3.48       |                              |                               |                               |                                  | 1000                        |                         | 117.9                  | 3.72      | 17.9        |                              |                               |                               |
|                                               | 1000                        |                         | 92.63                  | 2.53      | -7.37       |                              |                               |                               |                                  | 1000                        |                         | 87.76                  | 9.13      | -12.2       |                              |                               |                               |
| 5-F-PENTYL-3-PYRIDINOYLINDOLE                 | 10                          | 12.12                   | 95.28                  | 10.6      | -4.72       | 10-1000                      | 3                             | 10                            | PARACETAMOL (103-90-2)           | 100                         | 3.93                    | 117.9                  | 3.72      | 17.9        | 100-5000                     | 30                            | 100                           |
|                                               | 100                         |                         | 104.0                  | 5.81      | 3.95        |                              |                               |                               |                                  | 1000                        |                         | 87.76                  | 9.13      | -12.2       |                              |                               |                               |
|                                               | 1000                        |                         | 110.1                  | 7.10      | 10.1        |                              |                               |                               |                                  | 1000                        |                         | 87.76                  | 9.13      | -12.2       |                              |                               |                               |

| Analyte (CAS numer)                | C<br>(ng mL <sup>-1</sup> ) | t <sub>R</sub><br>(min) | R <sub>av</sub><br>(%) | CV<br>(%) | BIAS<br>(%) | RA<br>(ng mL <sup>-1</sup> ) | LOD<br>(ng mL <sup>-1</sup> ) | LOQ<br>(ng mL <sup>-1</sup> ) | Analyte (CAS numer)                  | C<br>(ng mL <sup>-1</sup> ) | t <sub>R</sub><br>(min) | R <sub>av</sub><br>(%) | CV<br>(%) | BIAS<br>(%) | RA<br>(ng mL <sup>-1</sup> ) | LOD<br>(ng mL <sup>-1</sup> ) | LOQ<br>(ng mL <sup>-1</sup> ) |
|------------------------------------|-----------------------------|-------------------------|------------------------|-----------|-------------|------------------------------|-------------------------------|-------------------------------|--------------------------------------|-----------------------------|-------------------------|------------------------|-----------|-------------|------------------------------|-------------------------------|-------------------------------|
| 5F-SDB-005 (2185863-14-1)          | 10                          | 14.79                   | 90.33                  | 12.0      | -9.67       | 10-1000                      | 3                             | 10                            | PAROXETINE (78246-49-8)              | 5000                        | 10.58                   | 107.6                  | 4.52      | 7.59        | 100-5000                     | 30                            | 100                           |
|                                    | 100                         |                         | 106.3                  | 9.61      | 6.27        |                              |                               |                               |                                      | 100                         |                         | 100.4                  | 7.68      | 0.380       |                              |                               |                               |
|                                    | 1000                        |                         | 100.7                  | 7.57      | 0.720       |                              |                               |                               |                                      | 1000                        |                         | 117.0                  | 6.51      | 17.0        |                              |                               |                               |
| 5-HYDROXY DMT (55206-22-9)         | 100                         | 2.99                    | 116.2                  | 4.59      | 16.2        | -                            | 30                            | -                             | PCEEA (1798021-89-2)                 | 5000                        | 9.18                    | 100.5                  | 3.04      | 0.530       | 10-5000                      | 3                             | 10                            |
|                                    | 1000                        |                         | 60.52                  | 4.81      | -39.5       |                              |                               |                               |                                      | 10                          |                         | 92.89                  | 6.83      | -7.11       |                              |                               |                               |
|                                    | 5000                        |                         | 58.69                  | 3.21      | -41.3       |                              |                               |                               |                                      | 100                         |                         | 104.4                  | 6.53      | 4.36        |                              |                               |                               |
| 5-IT (3784-30-3)                   | 100                         | 5.08                    | 99.99                  | 6.72      | -0.01       | 100-5000                     | 30                            | 100                           | PCMPA (1934-63-0)                    | 1000                        | 8.96                    | 108.4                  | 2.24      | 8.41        | 10-5000                      | 3                             | 10                            |
|                                    | 1000                        |                         | 97.99                  | 7.59      | -2.01       |                              |                               |                               |                                      | 2000                        |                         | 100.9                  | 5.03      | 0.900       |                              |                               |                               |
|                                    | 5000                        |                         | -                      | -         | -           |                              |                               |                               |                                      | 5000                        |                         | 94.17                  | 5.25      | -5.83       |                              |                               |                               |
| 5-MAPB (1823925-53-6)              | 100                         | 6.71                    | 111.3                  | 6.02      | 11.3        | 100-5000                     | 30                            | 100                           | PCPr (1934-55-0)                     | 10                          | 9.06                    | 87.59                  | 2.62      | -12.4       | 10-5000                      | 3                             | 10                            |
|                                    | 1000                        |                         | 99.04                  | 6.52      | -0.96       |                              |                               |                               |                                      | 100                         |                         | 96.51                  | 7.48      | -3.49       |                              |                               |                               |
|                                    | 5000                        |                         | 107.9                  | 2.76      | 7.91        |                              |                               |                               |                                      | 1000                        |                         | 99.55                  | 5.31      | -0.45       |                              |                               |                               |
| 5-MAPDB (2748590-04-5)             | 10                          | 5.69                    | 76.41                  | 13.3      | -23.6       | 100-5000                     | 30                            | 100                           | PENTEDRONE (879669-95-1)             | 2000                        | 6.85                    | 94.67                  | 8.91      | -5.33       | 10-5000                      | 3                             | 10                            |
|                                    | 100                         |                         | 110.1                  | 6.19      | 10.1        |                              |                               |                               |                                      | 5000                        |                         | 89.00                  | 6.51      | -11.0       |                              |                               |                               |
|                                    | 1000                        |                         | 88.41                  | 3.07      | -11.6       |                              |                               |                               |                                      | 10                          |                         | 100.4                  | 13.4      | 0.370       |                              |                               |                               |
| 5-MeO-ALPHA-ET (4765-10-0)         | 1000                        | 7.09                    | 84.51                  | 6.11      | -15.5       | 10-5000                      | 3                             | 10                            | PENTEDRONE METABOLITE (1422513-91-4) | 100                         | 6.90                    | 92.95                  | 5.11      | -7.05       | 100-5000                     | 30                            | 100                           |
|                                    | 2000                        |                         | 93.31                  | 3.05      | -6.69       |                              |                               |                               |                                      | 1000                        |                         | 92.12                  | 3.00      | -7.88       |                              |                               |                               |
|                                    | 5000                        |                         | 85.16                  | 18.7      | -14.8       |                              |                               |                               |                                      | 2000                        |                         | 85.58                  | 4.11      | -14.4       |                              |                               |                               |
| 5-MeO-DALT (928822-98-4)           | 100                         | 7.31                    | 98.61                  | 11.9      | -1.39       | 10-5000                      | 3                             | 10                            | PENTYLONE (17763-01-8)               | 5000                        | 7.21                    | 86.58                  | 4.01      | -13.4       | 100-5000                     | 30                            | 100                           |
|                                    | 1000                        |                         | 106.7                  | 5.97      | 6.65        |                              |                               |                               |                                      | 100                         |                         | 108.5                  | 7.17      | 8.54        |                              |                               |                               |
|                                    | 2000                        |                         | 99.27                  | 2.50      | -0.73       |                              |                               |                               |                                      | 1000                        |                         | 96.09                  | 11.4      | -3.91       |                              |                               |                               |
| 5-METHOXY AMT (1137-04-8)          | 5000                        | 6.02                    | 95.13                  | 3.36      | -4.87       | 100-5000                     | 30                            | 100                           | PHENAZEPAM (51753-57-2)              | 100                         | 12.14                   | 111.7                  | 6.58      | 11.7        | 100-5000                     | 30                            | 100                           |
|                                    | 100                         |                         | 107.0                  | 14.7      | 6.99        |                              |                               |                               |                                      | 100                         |                         | 112.4                  | 3.90      | 12.4        |                              |                               |                               |
|                                    | 1000                        |                         | 108.5                  | 4.98      | 8.50        |                              |                               |                               |                                      | 1000                        |                         | 113.7                  | 3.13      | 13.7        |                              |                               |                               |
| 5-METHOXY DiPT (4021-34-5)         | 5000                        | 7.32                    | 100.1                  | 5.10      | 0.130       | 100-5000                     | 30                            | 100                           | PHENCYCLIDINE (956-90-1)             | 5000                        | 8.55                    | 100.1                  | 7.15      | 0.120       | 100-5000                     | 30                            | 100                           |
|                                    | 100                         |                         | 113.4                  | 4.37      | 13.4        |                              |                               |                               |                                      | 100                         |                         | 111.3                  | 4.77      | 11.3        |                              |                               |                               |
|                                    | 1000                        |                         | 93.42                  | 9.54      | -6.58       |                              |                               |                               |                                      | 1000                        |                         | 117.4                  | 5.54      | 17.4        |                              |                               |                               |
| 5-METHOXY DMT (1019-45-0)          | 5000                        | 5.34                    | 110.8                  | 4.11      | 10.8        | 100-5000                     | 30                            | 100                           | PHENOBARBITAL (50-06-6)              | 100                         | 8.44                    | 112.9                  | 5.25      | 12.9        | 100-5000                     | 30                            | 100                           |
|                                    | 100                         |                         | 106.1                  | 6.89      | 6.11        |                              |                               |                               |                                      | 100                         |                         | 98.44                  | 6.73      | -1.56       |                              |                               |                               |
|                                    | 1000                        |                         | 112.4                  | 7.31      | 12.4        |                              |                               |                               |                                      | 1000                        |                         | 117.4                  | 1.09      | 17.4        |                              |                               |                               |
| 5-METHOXY METHYLONE (2702151-27-5) | 5000                        | 5.57                    | 109.4                  | 2.75      | 9.38        | 10-5000                      | 3                             | 10                            | PHENOBARBITAL (50-06-6)              | 100                         | 8.44                    | 110.5                  | 2.59      | 10.5        | 100-5000                     | 30                            | 100                           |
|                                    | 100                         |                         | 102.4                  | 11.3      | 2.40        |                              |                               |                               |                                      | 100                         |                         | 100.7                  | 7.29      | 0.690       |                              |                               |                               |
|                                    | 1000                        |                         | 97.36                  | 8.45      | -2.64       |                              |                               |                               |                                      | 1000                        |                         | 115.7                  | 6.22      | 15.7        |                              |                               |                               |
| 5-METHOXY METHYLONE (2702151-27-5) | 5000                        | 5.57                    | 96.67                  | 6.05      | -3.33       | 10-5000                      | 3                             | 10                            | PHENOBARBITAL (50-06-6)              | 5000                        | 8.44                    | 103.7                  | 3.46      | 3.66        | 100-5000                     | 30                            | 100                           |
|                                    | 10                          |                         | 113.2                  | 8.84      | 13.2        |                              |                               |                               |                                      | 100                         |                         | 104.6                  | 7.71      | 4.58        |                              |                               |                               |
|                                    | 100                         |                         | 115.8                  | 2.97      | 15.8        |                              |                               |                               |                                      | 1000                        |                         | 113.0                  | 6.20      | 13.0        |                              |                               |                               |
| 5-METHOXY METHYLONE (2702151-27-5) | 1000                        | 5.57                    | 79.77                  | 4.00      | -20.2       | 10-5000                      | 3                             | 10                            | PHENOBARBITAL (50-06-6)              | 5000                        | 8.44                    | 107.7                  | 5.99      | 7.70        | 100-5000                     | 30                            | 100                           |

| Analyte (CAS numer)         | C<br>(ng mL <sup>-1</sup> ) | t <sub>R</sub><br>(min) | R <sub>av</sub><br>(%) | CV<br>(%) | BIAS<br>(%) | RA<br>(ng mL <sup>-1</sup> ) | LOD<br>(ng mL <sup>-1</sup> ) | LOQ<br>(ng mL <sup>-1</sup> ) | Analyte (CAS numer)         | C<br>(ng mL <sup>-1</sup> ) | t <sub>R</sub><br>(min) | R <sub>av</sub><br>(%) | CV<br>(%) | BIAS<br>(%) | RA<br>(ng mL <sup>-1</sup> ) | LOD<br>(ng mL <sup>-1</sup> ) | LOQ<br>(ng mL <sup>-1</sup> ) |
|-----------------------------|-----------------------------|-------------------------|------------------------|-----------|-------------|------------------------------|-------------------------------|-------------------------------|-----------------------------|-----------------------------|-------------------------|------------------------|-----------|-------------|------------------------------|-------------------------------|-------------------------------|
| 5-METHOXY MiPT (96096-55-8) | 2000                        | 6.32                    | 71.44                  | 5.43      | -28.6       | 100-5000                     | 30                            | 100                           | PHENTERMINE (1197-21-3)     | 100                         | 5.98                    | 114.4                  | 7.26      | 14.4        | 100-5000                     | 30                            | 100                           |
|                             | 5000                        |                         | 82.75                  | 4.57      | -17.3       |                              |                               |                               |                             | 1000                        |                         | 110.6                  | 5.41      | 10.6        |                              |                               |                               |
|                             | 100                         |                         | 101.6                  | 11.7      | 1.57        |                              |                               |                               |                             | 5000                        |                         | 108.5                  | 5.39      | 8.50        |                              |                               |                               |
| 6-APB (286834-84-2)         | 1000                        | 6.51                    | 110.4                  | 6.36      | 10.4        | 100-5000                     | 30                            | 100                           | PHENYTOIN (57-41-0)         | 100                         | 10.21                   | 95.37                  | 6.41      | -4.63       | 100-5000                     | 30                            | 100                           |
|                             | 5000                        |                         | 103.4                  | 4.49      | 3.42        |                              |                               |                               |                             | 1000                        |                         | 118.0                  | 4.32      | 18.0        |                              |                               |                               |
|                             | 100                         |                         | 91.98                  | 10.6      | -8.02       |                              |                               |                               |                             | 5000                        |                         | 103.6                  | 5.34      | 3.63        |                              |                               |                               |
| 6-APDB (1281872-58-9)       | 1000                        | 6.06                    | 107.6                  | 11.0      | 7.58        | 100-5000                     | 30                            | 100                           | PRAVADOLINE (92623-83-1)    | 10                          | 10.24                   | 83.57                  | 13.7      | -16.4       | 10-5000                      | 3                             | 10                            |
|                             | 5000                        |                         | 112.3                  | 8.72      | 12.6        |                              |                               |                               |                             | 100                         |                         | 100.3                  | 5.95      | 0.310       |                              |                               |                               |
|                             | 10                          |                         | 101.3                  | 15.1      | 1.29        |                              |                               |                               |                             | 1000                        |                         | 105.4                  | 8.76      | 5.43        |                              |                               |                               |
| 6-BROMO-MDMA (87913-26-6)   | 100                         | 7.48                    | 108.4                  | 12.18     | 8.44        | 10-5000                      | 3                             | 10                            | PRAZEPAM (2955-38-6)        | 2000                        | 13.52                   | 102.5                  | 5.88      | 2.46        | 100-5000                     | 30                            | 100                           |
|                             | 2000                        |                         | 96.56                  | 6.52      | -3.44       |                              |                               |                               |                             | 100                         |                         | 110.2                  | 2.42      | 10.2        |                              |                               |                               |
|                             | 5000                        |                         | 94.17                  | 10.4      | -5.83       |                              |                               |                               |                             | 1000                        |                         | 113.8                  | 4.77      | 13.8        |                              |                               |                               |
| 6-CHLORO-MDMA (319920-71-3) | 10                          | 7.08                    | 85.92                  | 3.71      | -14.1       | 10-5000                      | 3                             | 10                            | PREGABALIN (148553-50-8)    | 5000                        | 4.62                    | 94.23                  | 2.21      | -5.77       | 100-5000                     | 30                            | 100                           |
|                             | 100                         |                         | 111.9                  | 7.53      | 11.9        |                              |                               |                               |                             | 100                         |                         | 100.9                  | 6.45      | 0.910       |                              |                               |                               |
|                             | 1000                        |                         | 111.7                  | 4.41      | 11.7        |                              |                               |                               |                             | 1000                        |                         | 106.2                  | 5.41      | 6.20        |                              |                               |                               |
| 6-EAPB (1823318-37-1)       | 2000                        | 7.03                    | 100.9                  | 4.12      | 0.930       | 10-5000                      | 3                             | 10                            | PROCAINE (51-05-8)          | 5000                        | 4.20                    | 89.59                  | 6.30      | -10.4       | 100-5000                     | 30                            | 100                           |
|                             | 5000                        |                         | 99.38                  | 3.16      | -0.62       |                              |                               |                               |                             | 100                         |                         | 101.6                  | 7.15      | 1.57        |                              |                               |                               |
|                             | 10                          |                         | 82.67                  | 9.88      | -17.3       |                              |                               |                               |                             | 1000                        |                         | 84.87                  | 5.66      | -15.1       |                              |                               |                               |
| 6-IT (21005-63-0)           | 100                         | 5.88                    | 108.2                  | 4.00      | 8.18        | 10-5000                      | 3                             | 10                            | PROLINTANE (1211-28-5)      | 5000                        | 8.04                    | 82.94                  | 5.28      | -17.1       | 100-5000                     | 30                            | 100                           |
|                             | 1000                        |                         | 104.7                  | 4.27      | 4.70        |                              |                               |                               |                             | 100                         |                         | 101.1                  | 6.74      | 1.12        |                              |                               |                               |
|                             | 2000                        |                         | 97.58                  | 4.68      | -2.42       |                              |                               |                               |                             | 1000                        |                         | 105.5                  | 2.97      | 5.54        |                              |                               |                               |
| 6-MAM (2784-73-8)           | 5000                        | 5.20                    | 94.20                  | 2.75      | -5.80       | 100-5000                     | 30                            | 100                           | PROPANOLOL (318-98-9)       | 5000                        | 9.12                    | 105.4                  | 4.85      | 5.36        | 100-5000                     | 30                            | 100                           |
|                             | 10                          |                         | 99.06                  | 9.71      | -0.94       |                              |                               |                               |                             | 100                         |                         | 108.2                  | 5.76      | 8.21        |                              |                               |                               |
|                             | 100                         |                         | 107.5                  | 11.5      | 7.52        |                              |                               |                               |                             | 1000                        |                         | 116.8                  | 4.18      | 16.8        |                              |                               |                               |
| 6-MAPB (2731011-08-6)       | 1000                        | 6.58                    | 110.6                  | 7.70      | 10.6        | 100-5000                     | 30                            | 10                            | PROPAPHENONE (34183-22-7)   | 5000                        | 10.71                   | 101.4                  | 3.57      | 1.43        | 100-5000                     | 30                            | 100                           |
|                             | 2000                        |                         | 94.46                  | 8.54      | -5.54       |                              |                               |                               |                             | 100                         |                         | 108.1                  | 4.00      | 8.05        |                              |                               |                               |
|                             | 5000                        |                         | 90.09                  | 5.44      | -9.91       |                              |                               |                               |                             | 1000                        |                         | 112.2                  | 4.29      | 12.2        |                              |                               |                               |
| 6-METHOXY MiPT (96096-55-8) | 10                          | 6.32                    | 99.70                  | 9.14      | -0.30       | 100-5000                     | 30                            | 100                           | PROPYLHEXEDRINE (1007-33-6) | 5000                        | 8.04                    | 98.15                  | 5.61      | -1.85       | 100-5000                     | 30                            | 100                           |
|                             | 100                         |                         | 105.9                  | 8.50      | 5.87        |                              |                               |                               |                             | 100                         |                         | 110.2                  | 7.56      | 10.2        |                              |                               |                               |
|                             | 1000                        |                         | 86.17                  | 5.69      | -13.8       |                              |                               |                               |                             | 1000                        |                         | 105.7                  | 6.54      | 5.71        |                              |                               |                               |
| 6-APB (286834-84-2)         | 2000                        | 6.51                    | 98.46                  | 2.54      | -1.54       | 100-5000                     | 30                            | 100                           | PSB-SB-1202 (1399049-60-5)  | 5000                        | 15.97                   | 104.8                  | 7.67      | 4.83        | 10-1000                      | 3                             | 10                            |
|                             | 5000                        |                         | 93.30                  | 5.60      | -6.70       |                              |                               |                               |                             | 100                         |                         | 97.80                  | 6.92      | -2.20       |                              |                               |                               |
|                             | 100                         |                         | 114.3                  | 7.19      | 14.3        |                              |                               |                               |                             | 1000                        |                         | 113.4                  | 5.95      | 13.4        |                              |                               |                               |
| 6-APB (286834-84-2)         | 1000                        | 6.51                    | 98.84                  | 5.78      | -1.16       | 100-5000                     | 30                            | 100                           | PSB-SB-1202 (1399049-60-5)  | 5000                        | 15.97                   | 111.2                  | 3.02      | 11.2        | 10-1000                      | 3                             | 10                            |
|                             | 5000                        |                         | 82.93                  | 5.05      | -17.1       |                              |                               |                               |                             | 10                          |                         | 91.11                  | 7.57      | -8.90       |                              |                               |                               |
|                             | 10                          |                         | 96.62                  | 15.3      | -3.38       |                              |                               |                               |                             | 100                         |                         | 79.82                  | 10.3      | -20.2       |                              |                               |                               |
| 6-APB (286834-84-2)         | 100                         | 6.58                    | 92.41                  | 16.3      | -7.59       | 10-5000                      | 30                            | 100                           | PSB-SB-1202 (1399049-60-5)  | 1000                        | 15.97                   | 119.7                  | 2.35      | 19.7        | 10-1000                      | 3                             | 10                            |



| Analyte (CAS numer)                              | C<br>(ng mL <sup>-1</sup> ) | t <sub>R</sub><br>(min) | R <sub>av</sub><br>(%) | CV<br>(%) | BIAS<br>(%) | RA<br>(ng mL <sup>-1</sup> ) | LOD<br>(ng mL <sup>-1</sup> ) | LOQ<br>(ng mL <sup>-1</sup> ) | Analyte (CAS numer)      | C<br>(ng mL <sup>-1</sup> ) | t <sub>R</sub><br>(min) | R <sub>av</sub><br>(%) | CV<br>(%) | BIAS<br>(%) | RA<br>(ng mL <sup>-1</sup> ) | LOD<br>(ng mL <sup>-1</sup> ) | LOQ<br>(ng mL <sup>-1</sup> ) |
|--------------------------------------------------|-----------------------------|-------------------------|------------------------|-----------|-------------|------------------------------|-------------------------------|-------------------------------|--------------------------|-----------------------------|-------------------------|------------------------|-----------|-------------|------------------------------|-------------------------------|-------------------------------|
|                                                  | 1000                        |                         | 104.2                  | 12.8      | 4.24        |                              |                               |                               |                          | 10                          |                         | 110.1                  | 3.54      | 10.1        |                              |                               |                               |
|                                                  | 2000                        |                         | 99.41                  | 15.8      | -0.59       |                              |                               |                               | PTI-1 (1400742-46-2)     | 100                         | 12.53                   | 97.71                  | 7.01      | -2.29       | 10-1000                      | 3                             | 10                            |
|                                                  | 5000                        |                         | 95.27                  | 12.6      | -4.73       |                              |                               |                               |                          | 1000                        |                         | 102.3                  | 8.19      | 2.34        |                              |                               |                               |
| 7-AMINOCLONAZEPAM (4959-17-5)                    | 100                         | 6.68                    | 108.5                  | 7.03      | 8.53        | 100-5000                     | 30                            | 100                           | PTI-2 (1400742-45-1)     | 10                          |                         | 97.95                  | 4.88      | -2.05       |                              |                               |                               |
|                                                  | 1000                        |                         | 108.1                  | 11.1      | 8.11        |                              |                               |                               |                          | 100                         | 12.78                   | 95.76                  | 4.93      | -4.24       | 10-1000                      | 3                             | 10                            |
|                                                  | 5000                        |                         | 105.8                  | 5.88      | 5.76        |                              |                               |                               |                          | 1000                        |                         | 101.1                  | 3.39      | 1.06        |                              |                               |                               |
| 7-AMINODESMETHYLFLUNITRAZEPAM (894-76-8)         | 100                         | 5.71                    | 93.53                  | 9.85      | -6.48       | 100-5000                     | 30                            | 100                           | PV-8 (13415-55-9)        | 100                         | 9.71                    | 105.3                  | 7.32      | 5.25        | 100-5000                     | 30                            | 100                           |
|                                                  | 1000                        |                         | 116.4                  | 7.36      | 16.4        |                              |                               |                               |                          | 1000                        |                         | 111.0                  | 1.37      | 11.0        |                              |                               |                               |
|                                                  | 5000                        |                         | 99.36                  | 11.6      | -0.64       |                              |                               |                               |                          | 5000                        |                         | 102.8                  | 3.76      | 2.80        |                              |                               |                               |
| 7-AMINOFUNITRAZEPAM (34084-50-9)                 | 100                         | 7.72                    | 81.75                  | 6.26      | -18.3       | 100-5000                     | 30                            | 100                           |                          | 10                          |                         | 81.33                  | 19.0      | -18.7       |                              |                               |                               |
|                                                  | 1000                        |                         | 118.3                  | 3.85      | 18.3        |                              |                               |                               | PV9 (2749897-19-4)       | 100                         |                         | 110.0                  | 4.96      | 10.0        |                              |                               |                               |
|                                                  | 5000                        |                         | 112.4                  | 4.09      | 12.4        |                              |                               |                               |                          | 1000                        | 10.70                   | 115.6                  | 3.98      | 15.6        | 10-5000                      | 3                             | 10                            |
| 7-AMINONITRAZEPAM (4928-02-3)                    | 100                         | 4.74                    | 103.2                  | 9.18      | 3.17        | 100-5000                     | 30                            | 100                           |                          | 2000                        |                         | 107.8                  | 3.54      | 7.84        |                              |                               |                               |
|                                                  | 1000                        |                         | 106.1                  | 4.58      | 6.13        |                              |                               |                               |                          | 5000                        |                         | 90.93                  | 7.68      | -9.07       |                              |                               |                               |
|                                                  | 5000                        |                         | 102.0                  | 4.88      | 2.03        |                              |                               |                               |                          | 10                          |                         | 105.0                  | 6.72      | 4.96        |                              |                               |                               |
| 7-APB (286834-86-4)                              | 10                          | 6.70                    | 89.46                  | 4.81      | -10.5       | 10-5000                      | 3                             | 10                            | PX-2 (2365471-47-0)      | 100                         | 12.76                   | 101.2                  | 6.05      | 1.24        | 10-1000                      | 3                             | 10                            |
|                                                  | 100                         |                         | 105.9                  | 5.41      | 5.88        |                              |                               |                               |                          | 1000                        |                         | 109.4                  | 4.70      | 9.39        |                              |                               |                               |
|                                                  | 1000                        |                         | 96.06                  | 7.51      | -3.94       |                              |                               |                               |                          | 100                         |                         | 92.36                  | 3.30      | -7.64       |                              |                               |                               |
|                                                  | 2000                        |                         | 86.69                  | 5.83      | -13.3       |                              |                               |                               | PYRAZOLAM (39243-02-2)   | 1000                        | 9.50                    | 116.4                  | 3.41      | 16.4        | 100-5000                     | 30                            | 100                           |
|                                                  | 5000                        |                         | 90.85                  | 3.29      | -9.15       |                              |                               |                               |                          | 5000                        |                         | 113.5                  | 3.74      | 13.5        |                              |                               |                               |
| 7-APDB (1337821-68-7)                            | 10                          | 5.99                    | 92.60                  | 14.7      | -7.40       | 10-5000                      | 3                             | 10                            | QUETIAPINE (111974-72-2) | 100                         | 9.62                    | 98.77                  | 8.05      | -1.23       | 100-5000                     | 30                            | 100                           |
|                                                  | 100                         |                         | 100.2                  | 11.4      | 0.21        |                              |                               |                               |                          | 1000                        |                         | 113.7                  | 3.47      | 13.7        |                              |                               |                               |
|                                                  | 1000                        |                         | 89.11                  | 8.02      | -10.9       |                              |                               |                               |                          | 5000                        |                         | 101.3                  | 3.71      | 1.31        |                              |                               |                               |
|                                                  | 2000                        |                         | 80.54                  | 0.870     | -19.5       |                              |                               |                               |                          | 10                          |                         | 85.32                  | 15.8      | -14.7       |                              |                               |                               |
|                                                  | 5000                        |                         | 82.63                  | 7.95      | -17.4       |                              |                               |                               |                          | 100                         |                         | 106.3                  | 8.24      | 6.34        |                              |                               |                               |
| A-834735 (895155-57-4)                           | 10                          | 14.21                   | 95.17                  | 5.06      | -4.83       | 10-1000                      | 3                             | 10                            | RH-34 (1028307-48-3)     | 1000                        | 8.13                    | 112.0                  | 4.25      | 12.0        | 10-5000                      | 3                             | 10                            |
|                                                  | 100                         |                         | 98.04                  | 9.92      | -1.96       |                              |                               |                               |                          | 2000                        |                         | 105.1                  | 4.18      | 5.06        |                              |                               |                               |
|                                                  | 1000                        |                         | 100.9                  | 5.65      | 0.870       |                              |                               |                               |                          | 5000                        |                         | 96.14                  | 2.88      | -3.86       |                              |                               |                               |
| A-836339 (959746-77-1)                           | 10                          | 12.46                   | 105.2                  | 6.14      | 5.15        | 10-1000                      | 3                             | 10                            |                          | 10                          |                         | 42.31                  | 73.9      | -57.7       |                              |                               |                               |
|                                                  | 100                         |                         | 104.6                  | 5.47      | 4.57        |                              |                               |                               | R-MMC (1246816-2-5)      | 100                         | 6.88                    | 100.9                  | 14.6      | 0.860       | 100-5000                     | 30                            | 100                           |
|                                                  | 1000                        |                         | 100.8                  | 1.48      | 0.820       |                              |                               |                               |                          | 1000                        |                         | 103.7                  | 6.70      | 3.67        |                              |                               |                               |
| AB-FUBINACA (1185282-01-2)                       | 10                          | 12.67                   | 91.35                  | 10.7      | -8.65       | 10-1000                      | 3                             | 10                            |                          | 2000                        |                         | 94.44                  | 6.08      | -5.56       |                              |                               |                               |
|                                                  | 100                         |                         | 106.7                  | 7.10      | 6.65        |                              |                               |                               |                          | 5000                        |                         | 89.34                  | 5.21      | -10.7       |                              |                               |                               |
|                                                  | 1000                        |                         | 115.7                  | 3.78      | 15.7        |                              |                               |                               |                          | 100                         |                         | 109.2                  | 9.75      | 9.16        |                              |                               |                               |
| AB-FUBINACA 2-FLUOROBENZYL ISOMER (1185282-16-9) | 10                          | 12.86                   | 102.3                  | 9.53      | 2.33        | 10-1000                      | 3                             | 10                            | SCOPOLAMINE (114-49-8)   | 1000                        | 4.80                    | 92.60                  | 6.73      | -7.40       | 100-5000                     | 3                             | 100                           |
|                                                  | 100                         |                         | 107.7                  | 7.19      | 7.69        |                              |                               |                               |                          | 5000                        |                         | 82.01                  | 8.44      | -18.0       |                              |                               |                               |
|                                                  | 1000                        |                         | 101.9                  | 5.66      | 1.93        |                              |                               |                               |                          | 10                          |                         | 95.00                  | 14.0      | -5.00       |                              |                               |                               |
| AB-FUBINACA 3-FLUOROBENZYL                       | 10                          | 12.76                   | 100.0                  | 8.11      | 0.00        | 10-1000                      | 3                             | 10                            | SDB-005 (2180934-13-6)   | 100                         | 15.57                   | 87.95                  | 12.6      | -12.1       | 10-1000                      | 3                             | 10                            |

| Analyte (CAS numer)                             | C<br>(ng mL <sup>-1</sup> ) | t <sub>R</sub><br>(min) | R <sub>av</sub><br>(%) | CV<br>(%) | BIAS<br>(%) | RA<br>(ng mL <sup>-1</sup> ) | LOD<br>(ng mL <sup>-1</sup> ) | LOQ<br>(ng mL <sup>-1</sup> ) | Analyte (CAS numer)        | C<br>(ng mL <sup>-1</sup> ) | t <sub>R</sub><br>(min) | R <sub>av</sub><br>(%) | CV<br>(%) | BIAS<br>(%) | RA<br>(ng mL <sup>-1</sup> ) | LOD<br>(ng mL <sup>-1</sup> ) | LOQ<br>(ng mL <sup>-1</sup> ) |
|-------------------------------------------------|-----------------------------|-------------------------|------------------------|-----------|-------------|------------------------------|-------------------------------|-------------------------------|----------------------------|-----------------------------|-------------------------|------------------------|-----------|-------------|------------------------------|-------------------------------|-------------------------------|
| ISOMER (185282-19-2)                            | 100                         |                         | 100.8                  | 4.38      | 0.830       |                              |                               |                               |                            | 1000                        |                         | 113.1                  | 4.17      | 13.1        |                              |                               |                               |
|                                                 | 1000                        |                         | 102.2                  | 7.06      | 2.16        |                              |                               |                               |                            | 10                          |                         | 100.2                  | 7.73      | 0.190       |                              |                               |                               |
| ADB-PINACA ISOMER 1                             | 10                          | 13.69                   | 107.1                  | 9.45      | 7.09        | 10-1000                      | 3                             | 10                            | SDB-006 (695213-59-3)      | 100                         | 14.09                   | 103.9                  | 6.08      | 3.88        | 10-1000                      | 3                             | 10                            |
|                                                 | 100                         |                         | 104.7                  | 8.04      | 4.71        |                              |                               |                               |                            | 1000                        |                         | 99.16                  | 4.45      | -0.840      |                              |                               |                               |
|                                                 | 1000                        |                         | 105.0                  | 7.38      | 5.00        |                              |                               |                               |                            | 100                         |                         | 104.5                  | 7.31      | 4.51        |                              |                               |                               |
| ADB-PINACA ISOMER 2                             | 10                          | 13.99                   | 101.8                  | 10.3      | 1.84        | 10-1000                      | 3                             | 10                            | SERTRALINE (79559-97-0)    | 1000                        | 11.57                   | 106.8                  | 6.82      | 6.81        | 100-5000                     | 30                            | 100                           |
|                                                 | 100                         |                         | 100.3                  | 3.82      | 0.32        |                              |                               |                               |                            | 5000                        |                         | 96.09                  | 8.67      | -3.91       |                              |                               |                               |
|                                                 | 1000                        |                         | 100.5                  | 9.52      | 0.490       |                              |                               |                               |                            | 100                         |                         | 104.3                  | 3.18      | 4.31        |                              |                               |                               |
| ADB-PINACA ISOMER 3                             | 10                          | 14.2                    | 95.21                  | 21.17     | -4.79       | 10-1000                      | 3                             | 10                            | SILDENAFIL (139755-83-2)   | 1000                        | 10.34                   | 114.9                  | 6.00      | 14.9        | 100-5000                     | 30                            | 100                           |
|                                                 | 100                         |                         | 99.21                  | 5.03      | -0.79       |                              |                               |                               |                            | 5000                        |                         | 101.5                  | 6.80      | 1.54        |                              |                               |                               |
|                                                 | 1000                        |                         | 102.5                  | 8.04      | 2.45        |                              |                               |                               |                            | 100                         |                         | 113.4                  | 4.26      | 13.4        |                              |                               |                               |
| ADB-PINACA ISOMER 4                             | 10                          | 13.99                   | 115.9                  | 10.33     | 15.9        | 10-1000                      | 3                             | 10                            | STANOZOLOL (10418-03-8)    | 1000                        | 14.13                   | 116.7                  | 3.79      | 16.7        | 100-5000                     | 30                            | 100                           |
|                                                 | 100                         |                         | 90.15                  | 9.00      | -9.85       |                              |                               |                               |                            | 5000                        |                         | 98.40                  | 3.76      | -1.60       |                              |                               |                               |
|                                                 | 1000                        |                         | 100.6                  | 10.4      | 0.62        |                              |                               |                               |                            | 10                          |                         | 91.50                  | 10.4      | -8.50       |                              |                               |                               |
| AH-7921 (55154-30-8)                            | 100                         | 9.79                    | 102.4                  | 7.44      | 2.40        | 100-5000                     | 30                            | 100                           | TAPENTADOL (175591-09-0)   | 100                         | 7.33                    | 108.1                  | 8.23      | 8.05        | 10-5000                      | 3                             | 10                            |
|                                                 | 1000                        |                         | 104.8                  | 4.52      | 4.79        |                              |                               |                               |                            | 1000                        |                         | 104.1                  | 6.55      | 4.07        |                              |                               |                               |
|                                                 | 5000                        |                         | 105.4                  | 3.65      | 5.38        |                              |                               |                               |                            | 2000                        |                         | 91.70                  | 3.74      | -8.30       |                              |                               |                               |
|                                                 | 10                          |                         | 88.67                  | 4.44      | -11.3       |                              |                               |                               |                            | 5000                        |                         | 86.99                  | 2.63      | -13.0       |                              |                               |                               |
| AKB48_N-(4-FLUOROBENZYL) ANALOG (2180933-90-6)  | 100                         | 15.64                   | 99.91                  | 6.55      | -0.09       | 10-1000                      | 3                             | 10                            | TEMAZEPAM (846-50-4)       | 100                         | 11.68                   | 91.84                  | 15.7      | -8.16       | 100-5000                     | 30                            | 100                           |
|                                                 | 1000                        |                         | 115.9                  | 3.50      | 15.9        |                              |                               |                               |                            | 1000                        |                         | 116.2                  | 7.32      | 16.2        |                              |                               |                               |
|                                                 | 100                         |                         | 98.00                  | 8.49      | -2.00       |                              |                               |                               |                            | 5000                        |                         | 97.65                  | 3.86      | -2.35       |                              |                               |                               |
| ALFA-ETHYLAMINOPENTIOPHENONE (18268-16-1)       | 100                         | 7.14                    | 108.6                  | 4.46      | 8.63        | 100-5000                     | 30                            | 100                           | TETRACAINE (92-24-6)       | 100                         | 9.03                    | 104.3                  | 10.1      | 4.31        | 10-5000                      | 3                             | 10                            |
|                                                 | 5000                        |                         | 105.6                  | 3.97      | 5.60        |                              |                               |                               |                            | 1000                        |                         | 110.5                  | 2.96      | 10.5        |                              |                               |                               |
|                                                 | 100                         |                         | 99.57                  | 4.26      | -0.43       |                              |                               |                               |                            | 2000                        |                         | 99.99                  | 3.58      | -0.010      |                              |                               |                               |
| ALFA-PROPYLAMINOPENTIOPHENONE (18268-15-0)      | 100                         | 7.90                    | 113.6                  | 5.44      | 13.6        | 100-5000                     | 30                            | 100                           | THIOPROPAMINE (53632-92-1) | 1000                        | 3.76                    | 93.71                  | 12.3      | -6.29       | 10-100                       | 3                             | 10                            |
|                                                 | 1000                        |                         | 108.2                  | 15.3      | 8.17        |                              |                               |                               |                            | 100                         |                         | 102.2                  | 5.64      | 2.17        |                              |                               |                               |
|                                                 | 5000                        |                         | 93.92                  | 14.2      | -6.08       |                              |                               |                               |                            | 1000                        |                         | 33.28                  | 3.80      | -66.7       |                              |                               |                               |
| ALPHA-DIMETHYLAMINOPENTIOPHENONE (2168229-67-0) | 10                          | 6.87                    | 86.48                  | 5.90      | -13.5       | 10-5000                      | 3                             | 10                            | THJ (2180931-94-4)         | 1000                        | 15.97                   | 31.96                  | 2.78      | -68.0       | 10-1000                      | 3                             | 10                            |
|                                                 | 100                         |                         | 99.52                  | 12.2      | -0.48       |                              |                               |                               |                            | 100                         |                         | 86.72                  | 9.37      | -13.3       |                              |                               |                               |
|                                                 | 1000                        |                         | 98.12                  | 8.30      | -1.88       |                              |                               |                               |                            | 1000                        |                         | 119.0                  | 2.71      | 19.0        |                              |                               |                               |
|                                                 | 2000                        |                         | 92.07                  | 9.97      | -7.93       |                              |                               |                               |                            | 10                          |                         | 103.1                  | 14.7      | 3.09        |                              |                               |                               |
|                                                 | 5000                        |                         | 88.69                  | 5.22      | -11.3       |                              |                               |                               |                            | 100                         |                         | 99.14                  | 15.2      | -0.860      |                              |                               |                               |
| ALPHA-ETHYLAMINOHEXANOPHENONE (18410-62-3)      | 10                          | 8.42                    | 101.3                  | 10.4      | 1.28        | 10-5000                      | 3                             | 10                            | TILETAMINE (14176-50-2)    | 1000                        | 5.70                    | 73.38                  | 3.24      | -26.6       | 10-5000                      | 3                             | 10                            |
|                                                 | 100                         |                         | 107.4                  | 7.85      | 7.36        |                              |                               |                               |                            | 1000                        |                         | 70.12                  | 6.13      | -29.9       |                              |                               |                               |
|                                                 | 2000                        |                         | 88.12                  | 6.16      | -11.9       |                              |                               |                               |                            | 5000                        |                         | 36.65                  | 5.45      | -63.4       |                              |                               |                               |

| Analyte (CAS numer)                         | C<br>(ng mL <sup>-1</sup> ) | t <sub>R</sub><br>(min) | R <sub>av</sub><br>(%) | CV<br>(%) | BIAS<br>(%) | RA<br>(ng mL <sup>-1</sup> ) | LOD<br>(ng mL <sup>-1</sup> ) | LOQ<br>(ng mL <sup>-1</sup> ) | Analyte (CAS numer)      | C<br>(ng mL <sup>-1</sup> ) | t <sub>R</sub><br>(min) | R <sub>av</sub><br>(%) | CV<br>(%) | BIAS<br>(%) | RA<br>(ng mL <sup>-1</sup> ) | LOD<br>(ng mL <sup>-1</sup> ) | LOQ<br>(ng mL <sup>-1</sup> ) |         |          |    |     |
|---------------------------------------------|-----------------------------|-------------------------|------------------------|-----------|-------------|------------------------------|-------------------------------|-------------------------------|--------------------------|-----------------------------|-------------------------|------------------------|-----------|-------------|------------------------------|-------------------------------|-------------------------------|---------|----------|----|-----|
|                                             | 1000                        |                         | 112.5                  | 4.69      | 12.5        |                              |                               |                               |                          | 5000                        |                         | 81.32                  | 5.22      | -18.7       |                              |                               |                               |         |          |    |     |
|                                             | 2000                        |                         | 108.3                  | 5.19      | 8.28        |                              |                               |                               |                          | 100                         |                         | 6.96                   | 113.2     | 5.70        |                              |                               |                               | 13.2    |          |    |     |
|                                             | 5000                        |                         | 100.0                  | 4.73      | 0.040       |                              |                               |                               |                          | 100-5000                    |                         | 1000                   | 105.5     | 4.65        |                              |                               |                               | 5.47    | 100-5000 | 30 | 100 |
| ALPHA-ETHYLTRYPTAMINE (2235-90-7)           | 100                         | 7.14                    | 103.4                  | 2.53      | 3.36        | 100-5000                     | 30                            | 100                           | TRAMADOL (36282-47-2)    | 5000                        |                         | 106.9                  | 6.29      | 6.85        |                              |                               |                               |         |          |    |     |
|                                             | 1000                        |                         | 99.23                  | 11.8      | -0.77       |                              |                               |                               |                          | 100                         |                         | 8.39                   | 112.0     | 5.02        |                              |                               |                               | 12.0    |          |    |     |
|                                             | 5000                        |                         | 106.1                  | 2.38      | 6.06        |                              |                               |                               |                          | 100-5000                    |                         | 1000                   | 100.7     | 7.65        |                              |                               |                               | 0.690   | 100-5000 | 30 | 100 |
| ALPHA-METHYLTRYPTAMINE (299-26-3)           | 100                         | 5.77                    | 90.67                  | 11.9      | -9.33       | 100-5000                     | 30                            | 100                           | TRIAZOLAM (28911-01-5)   | 5000                        |                         | 86.79                  | 6.49      | -13.2       |                              |                               |                               |         |          |    |     |
|                                             | 1000                        |                         | 104.1                  | 7.57      | 4.08        |                              |                               |                               |                          | 100                         |                         | 11.46                  | 97.70     | 6.47        |                              |                               |                               | -2.30   |          |    |     |
|                                             | 5000                        |                         | 97.46                  | 5.78      | -2.54       |                              |                               |                               |                          | 100-5000                    |                         | 1000                   | 114.9     | 4.94        |                              |                               |                               | 14.9    | 100-5000 | 30 | 100 |
| ALPHA-PHP (13415-59-3)                      | 10                          | 8.43                    | 93.22                  | 9.55      | -6.78       | 10-5000                      | 3                             | 10                            | TRIMIPRAMINE (521-78-8)  | 5000                        |                         | 101.4                  | 6.96      | 1.42        |                              |                               |                               |         |          |    |     |
|                                             | 100                         |                         | 104.1                  | 5.66      | 4.06        |                              |                               |                               |                          | 100                         |                         | 11.02                  | 107.7     | 9.07        |                              |                               |                               | 7.72    |          |    |     |
|                                             | 1000                        |                         | 100.7                  | 4.59      | 0.670       |                              |                               |                               |                          | 100-5000                    |                         | 1000                   | 110.8     | 7.38        |                              |                               |                               | 10.8    | 100-5000 | 30 | 100 |
|                                             | 2000                        |                         | 95.54                  | 2.03      | -4.46       |                              |                               |                               |                          | 5000                        |                         | 100.7                  | 2.54      | 0.680       |                              |                               |                               |         |          |    |     |
| ALPHA-PHTALIMIDOPROPIOPHENONE (19437-20-8)  | 10                          | 11.76                   | 84.85                  | 11.2      | -15.2       | 10-5000                      | 3                             | 10                            | U-47700 (82657-23-6)     | 10                          |                         | 78.52                  | 2.60      | -21.5       |                              |                               |                               |         |          |    |     |
|                                             | 100                         |                         | 114.2                  | 5.01      | 14.2        |                              |                               |                               |                          | 100                         |                         | 9.13                   | 113.3     | 4.22        |                              |                               |                               | 13.3    |          |    |     |
|                                             | 1000                        |                         | 114.1                  | 3.59      | 14.1        |                              |                               |                               |                          | 10-5000                     |                         | 1000                   | 111.8     | 5.67        |                              |                               |                               | 11.8    | 10-5000  | 3  | 10  |
|                                             | 2000                        |                         | 103.9                  | 2.48      | 3.91        |                              |                               |                               |                          | 5000                        |                         | 102.5                  | 6.93      | 2.48        |                              |                               |                               |         |          |    |     |
|                                             | 5000                        |                         | 89.53                  | 3.32      | -10.5       |                              |                               |                               |                          | 10                          |                         | 83.89                  | 5.74      | -16.1       |                              |                               |                               |         |          |    |     |
| ALPHA-PIPBP (92728-82-0)                    | 10                          | 6.53                    | 92.70                  | 6.30      | -7.30       | 10-5000                      | 3                             | 10                            | W-15 (93100-99-3)        | 100                         |                         | 103.7                  | 5.43      | 3.67        |                              |                               |                               |         |          |    |     |
|                                             | 100                         |                         | 95.67                  | 3.97      | -4.33       |                              |                               |                               |                          | 1000                        |                         | 13.31                  | 109.8     | 6.40        |                              |                               |                               | 9.84    | 10-5000  | 3  | 10  |
|                                             | 1000                        |                         | 94.28                  | 5.17      | -5.72       |                              |                               |                               |                          | 2000                        |                         | 98.01                  | 5.34      | -1.99       |                              |                               |                               |         |          |    |     |
|                                             | 2000                        |                         | 87.85                  | 2.97      | -12.2       |                              |                               |                               |                          | 5000                        |                         | 98.68                  | 8.19      | -1.32       |                              |                               |                               |         |          |    |     |
|                                             | 5000                        |                         | 83.12                  | 4.35      | -16.9       |                              |                               |                               |                          | 10                          |                         | 86.55                  | 13.9      | -13.5       |                              |                               |                               |         |          |    |     |
| ALPHA-PPP (92040-10-3)                      | 10                          | 5.06                    | 93.49                  | 11.4      | -6.51       | 10-100                       | 3                             | 10                            | WIN 54,461 (166599-63-9) | 100                         |                         | 97.27                  | 5.99      | -2.73       |                              |                               |                               |         |          |    |     |
|                                             | 100                         |                         | 97.85                  | 9.59      | -2.15       |                              |                               |                               |                          | 1000                        |                         | 12.41                  | 99.27     | 3.84        |                              |                               |                               | -0.73   |          |    |     |
|                                             | 1000                        |                         | 66.80                  | 3.50      | -33.2       |                              |                               |                               |                          | 10                          |                         | 104.9                  | 11.0      | 4.91        |                              |                               |                               |         |          |    |     |
|                                             | 2000                        |                         | 60.86                  | 4.62      | -39.1       |                              |                               |                               |                          | 100                         |                         | 13.65                  | 95.03     | 4.94        |                              |                               |                               | -4.97   | 10-1000  | 3  | 10  |
|                                             | 5000                        |                         | 57.78                  | 43.3      | -42.2       |                              |                               |                               |                          | 1000                        |                         | 91.09                  | 7.43      | -8.91       |                              |                               |                               |         |          |    |     |
| ALPHA-PVP (5485-65-4)                       | 100                         | 7.29                    | 96.93                  | 7.01      | -3.07       | 100-5000                     | 30                            | 100                           | XLR12 (895155-78-9)      | 10                          |                         | 93.26                  | 17.5      | -6.74       |                              |                               |                               |         |          |    |     |
|                                             | 1000                        |                         | 104.0                  | 6.41      | 3.95        |                              |                               |                               |                          | 100                         |                         | 14.79                  | 88.36     | 13.3        |                              |                               |                               | -11.6   | 10-1000  | 3  | 10  |
|                                             | 5000                        |                         | 102.5                  | 3.67      | 2.47        |                              |                               |                               |                          | 1000                        |                         | 102.6                  | 7.70      | 2.64        |                              |                               |                               |         |          |    |     |
| ALPHA-PVT (2748622-52-6)                    | 100                         | 6.39                    | 104.4                  | 4.50      | 4.43        | 100-5000                     | 30                            | 100                           | YANGONIN (500-62-9)      | 10                          |                         | 103.4                  | 11.5      | 3.43        |                              |                               |                               |         |          |    |     |
|                                             | 1000                        |                         | 108.0                  | 7.41      | 8.04        |                              |                               |                               |                          | 100                         |                         | 11.88                  | 93.63     | 7.51        |                              |                               |                               | -6.37   |          |    |     |
|                                             | 5000                        |                         | 105.3                  | 5.04      | 5.33        |                              |                               |                               |                          | 1000                        |                         | 124.4                  | 2.82      | 24.4        |                              |                               |                               | 10-5000 | 3        | 10 |     |
| ALPHA-PYRROLIDINOBUTHIOPHENONE (13415-54-8) | 10                          | 5.00                    | 114.5                  | 6.79      | 14.5        | 10-5000                      | 3                             | 10                            | ZALEPLON (151319-34-5)   | 2000                        |                         | 113.2                  | 4.65      | 13.2        |                              |                               |                               |         |          |    |     |
|                                             | 100                         |                         | 114.6                  | 4.66      | 14.6        |                              |                               |                               |                          | 5000                        |                         | 117.6                  | 3.14      | 17.6        |                              |                               |                               |         |          |    |     |
|                                             | 1000                        |                         | 76.60                  | 4.86      | -23.4       |                              |                               |                               |                          | 100                         |                         | 10.05                  | 93.55     | 10.2        |                              |                               |                               | -6.45   | 100-     | 30 | 100 |

| Analyte (CAS numer)                            | C<br>(ng mL <sup>-1</sup> ) | t <sub>R</sub><br>(min) | R <sub>av</sub><br>(%) | CV<br>(%) | BIAS<br>(%) | RA<br>(ng mL <sup>-1</sup> ) | LOD<br>(ng mL <sup>-1</sup> ) | LOQ<br>(ng mL <sup>-1</sup> ) | Analyte (CAS numer)             | C<br>(ng mL <sup>-1</sup> ) | t <sub>R</sub><br>(min) | R <sub>av</sub><br>(%) | CV<br>(%) | BIAS<br>(%) | RA<br>(ng mL <sup>-1</sup> ) | LOD<br>(ng mL <sup>-1</sup> ) | LOQ<br>(ng mL <sup>-1</sup> ) |
|------------------------------------------------|-----------------------------|-------------------------|------------------------|-----------|-------------|------------------------------|-------------------------------|-------------------------------|---------------------------------|-----------------------------|-------------------------|------------------------|-----------|-------------|------------------------------|-------------------------------|-------------------------------|
|                                                | 2000                        |                         | 71.51                  | 5.06      | -28.5       |                              |                               |                               |                                 | 1000                        |                         | 110.5                  | 5.04      | 10.5        | 5000                         |                               |                               |
|                                                | 5000                        |                         | 82.28                  | 3.03      | -17.7       |                              |                               |                               |                                 | 5000                        |                         | 109.8                  | 4.50      | 9.79        |                              |                               |                               |
| ALPRAZOLAM (28981-97-7)                        | 100                         | 11.46                   | 97.10                  | 7.57      | -2.90       | 100-5000                     | 30                            | 100                           | ZOLPIDEM (82626-48-0)           | 100                         | 7.96                    | 97.13                  | 6.56      | -2.87       | 100-5000                     | 30                            | 100                           |
|                                                | 1000                        |                         | 113.8                  | 7.29      | 13.8        |                              |                               |                               | 1000                            | 115.3                       |                         | 10.1                   | 15.3      |             |                              |                               |                               |
|                                                | 5000                        |                         | 116.7                  | 3.51      | 16.7        |                              |                               |                               | 5000                            | 111.6                       |                         | 2.68                   | 11.6      |             |                              |                               |                               |
|                                                | 10                          |                         | 116.6                  | 5.87      | 16.6        |                              |                               |                               | 100                             | 111.1                       |                         | 4.25                   | 11.1      |             |                              |                               |                               |
| AM1220 (137642-54-7)                           | 100                         | 10.52                   | 97.82                  | 3.75      | -2.18       | 10-1000                      | 3                             | 10                            | ZOPICLONE (43200-80-2)          | 1000                        | 6.84                    | 115.9                  | 5.11      | 15.9        | 100-5000                     | 30                            | 100                           |
|                                                | 1000                        |                         | 97.65                  | 4.44      | -2.35       |                              |                               |                               | 5000                            | 87.28                       |                         | 6.06                   | -12.7     |             |                              |                               |                               |
|                                                | 10                          |                         | 96.74                  | 15.1      | -3.26       |                              |                               |                               | 100                             | 100.2                       |                         | 7.08                   | 0.160     |             |                              |                               |                               |
| AM2201 8-QUINOLINYL CARBOXAMIDE (2365471-42-5) | 100                         | 14.98                   | 95.26                  | 6.36      | -4.74       | 10-1000                      | 3                             | 10                            | ZUCLOPENTHIXOL (53772-83-1)     | 1000                        | 12.20                   | 118.6                  | 2.39      | 18.6        | 100-5000                     | 30                            | 100                           |
|                                                | 1000                        |                         | 117.1                  | 5.14      | 17.1        |                              |                               |                               | 5000                            | 107.2                       |                         | 5.84                   | 7.20      |             |                              |                               |                               |
|                                                | 10                          |                         | 119.4                  | 6.98      | 19.4        |                              |                               |                               | 100                             | 98.17                       |                         | 8.20                   | -1.83     |             |                              |                               |                               |
| AM2201 BENZIMIDAZOLE ANALOG (1984789-90-3)     | 100                         | 14.45                   | 94.22                  | 5.78      | -5.78       | 10-1000                      | 3                             | 10                            | α-HYDROXYMIDAZOLAM (59468-90-5) | 1000                        | 10.07                   | 116.2                  | 3.82      | 16.2        | 100-5000                     | 30                            | 100                           |
|                                                | 1000                        |                         | 86.15                  | 7.63      | -13.9       |                              |                               |                               | 5000                            | 100.1                       |                         | 5.12                   | 0.10      |             |                              |                               |                               |
|                                                | 10                          |                         | 98.69                  | 7.33      | -1.31       |                              |                               |                               |                                 |                             |                         |                        |           |             |                              |                               |                               |
| AM2232 (335161-19-8)                           | 100                         | 12.76                   | 93.70                  | 5.56      | -6.30       | 10-1000                      | 3                             | 10                            |                                 |                             |                         |                        |           |             |                              |                               |                               |
|                                                | 1000                        |                         | 95.30                  | 5.46      | -4.70       |                              |                               |                               |                                 |                             |                         |                        |           |             |                              |                               |                               |
|                                                | 10                          |                         |                        |           |             |                              |                               |                               |                                 |                             |                         |                        |           |             |                              |                               |                               |

Figure S1. Chromatogram for blank injection.

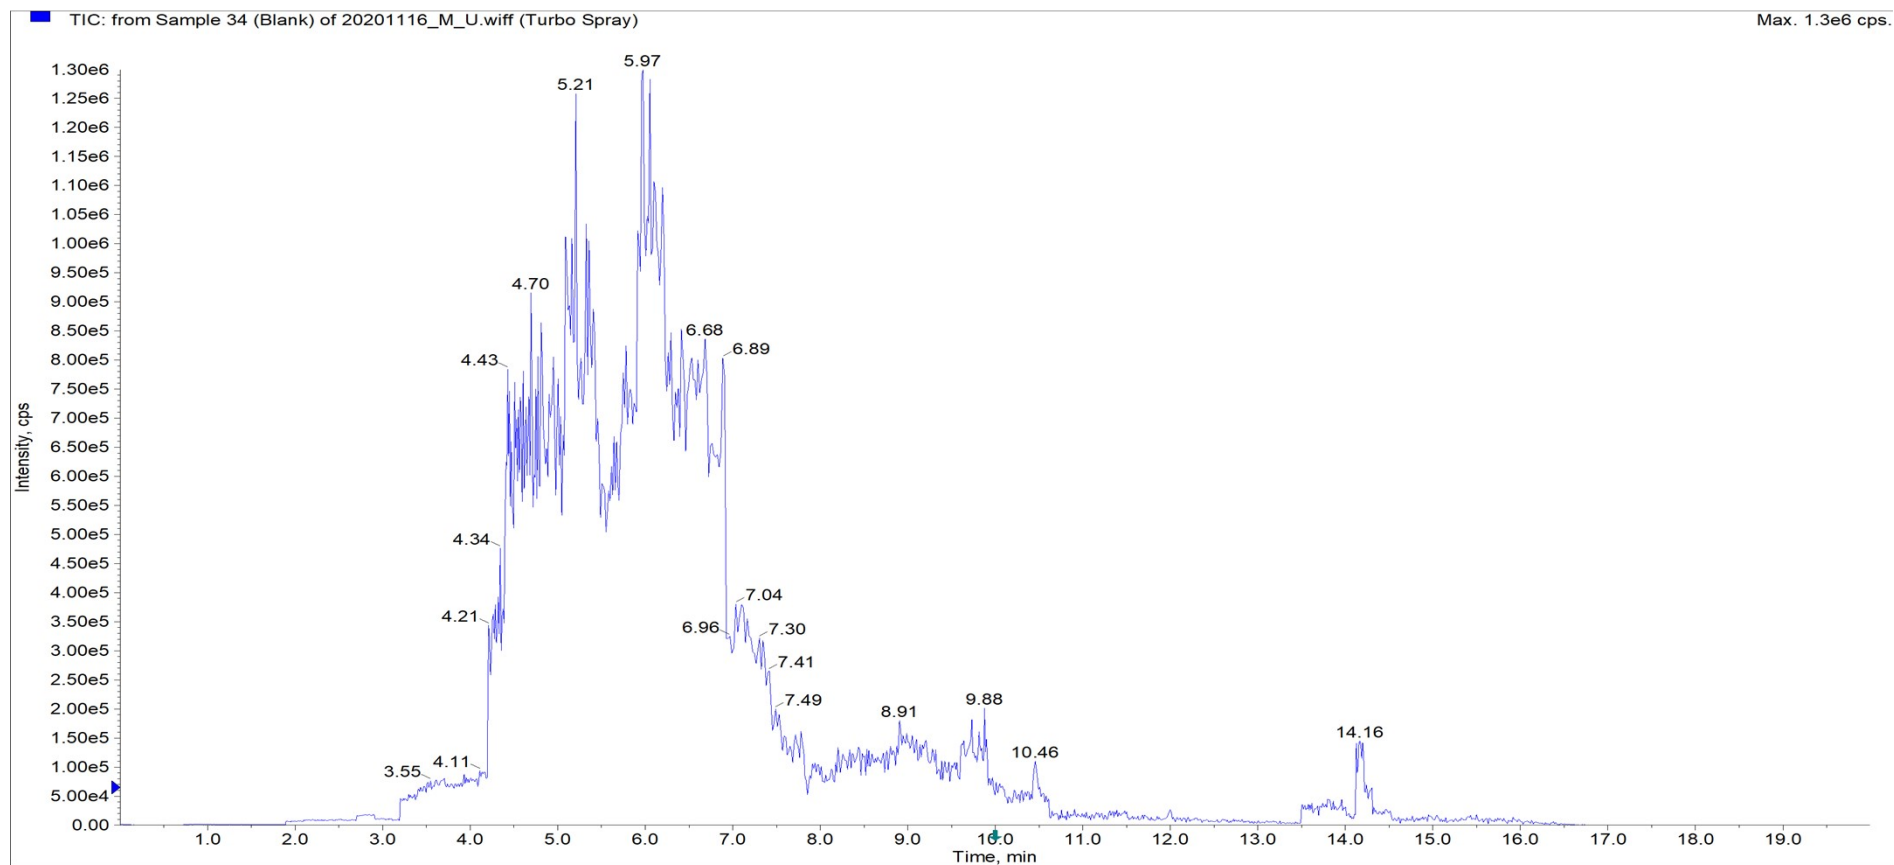

Figure S2. Chromatogram for standard solution 0.1 ng mL<sup>-1</sup> in urine.

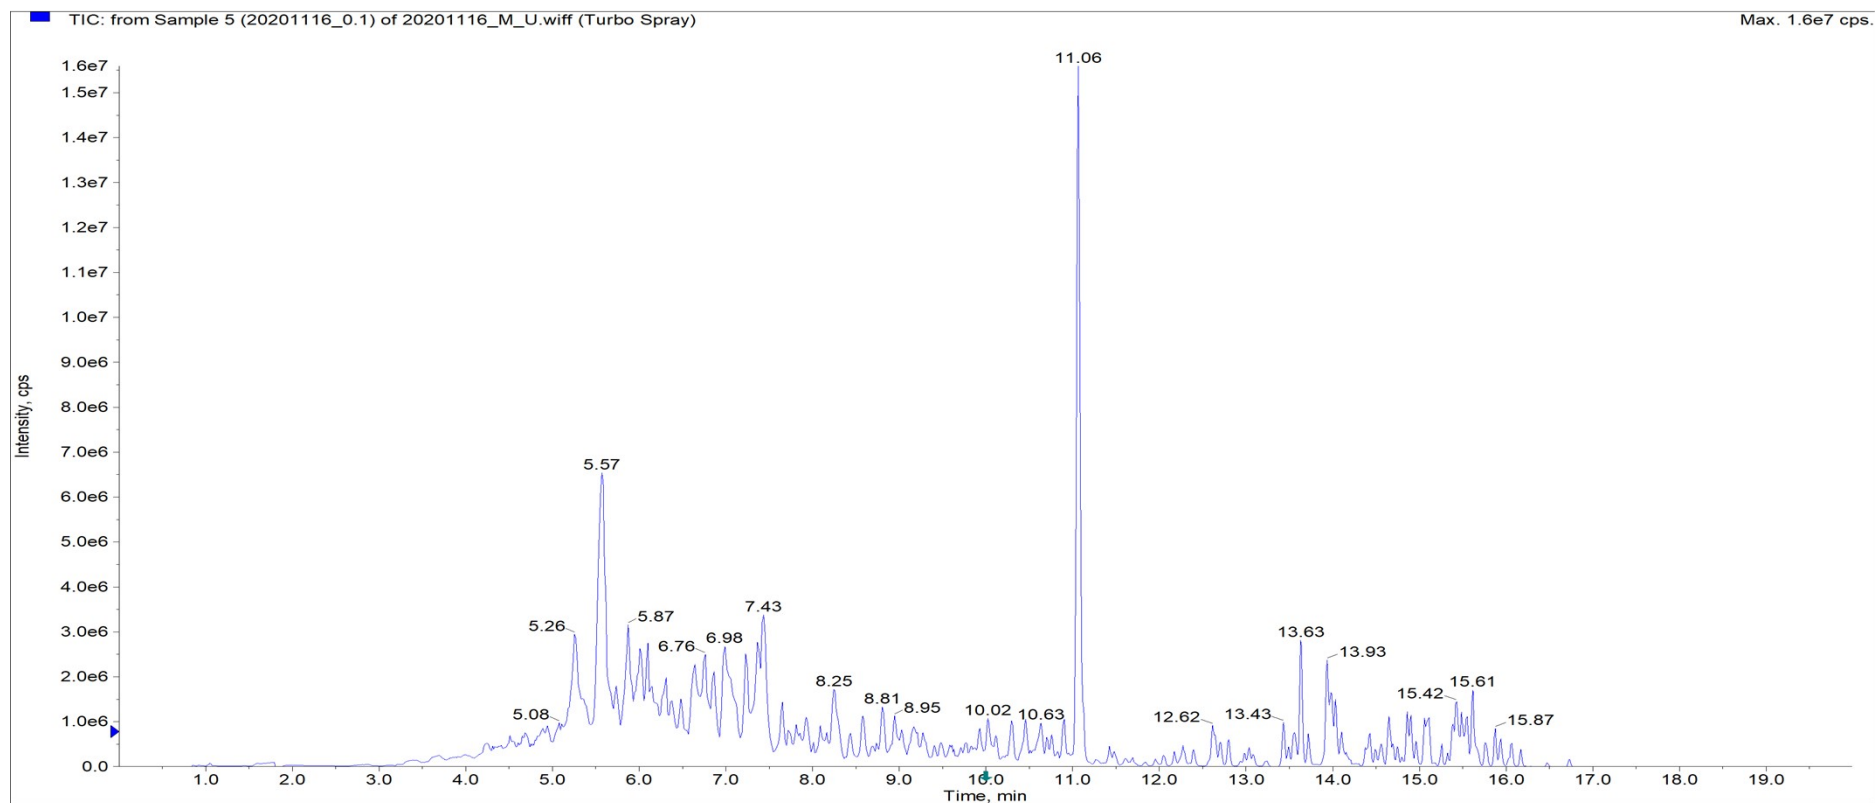

Figure S3. Chromatogram of the matrix (urine) with addition of a standard (1 ng mL<sup>-1</sup>).

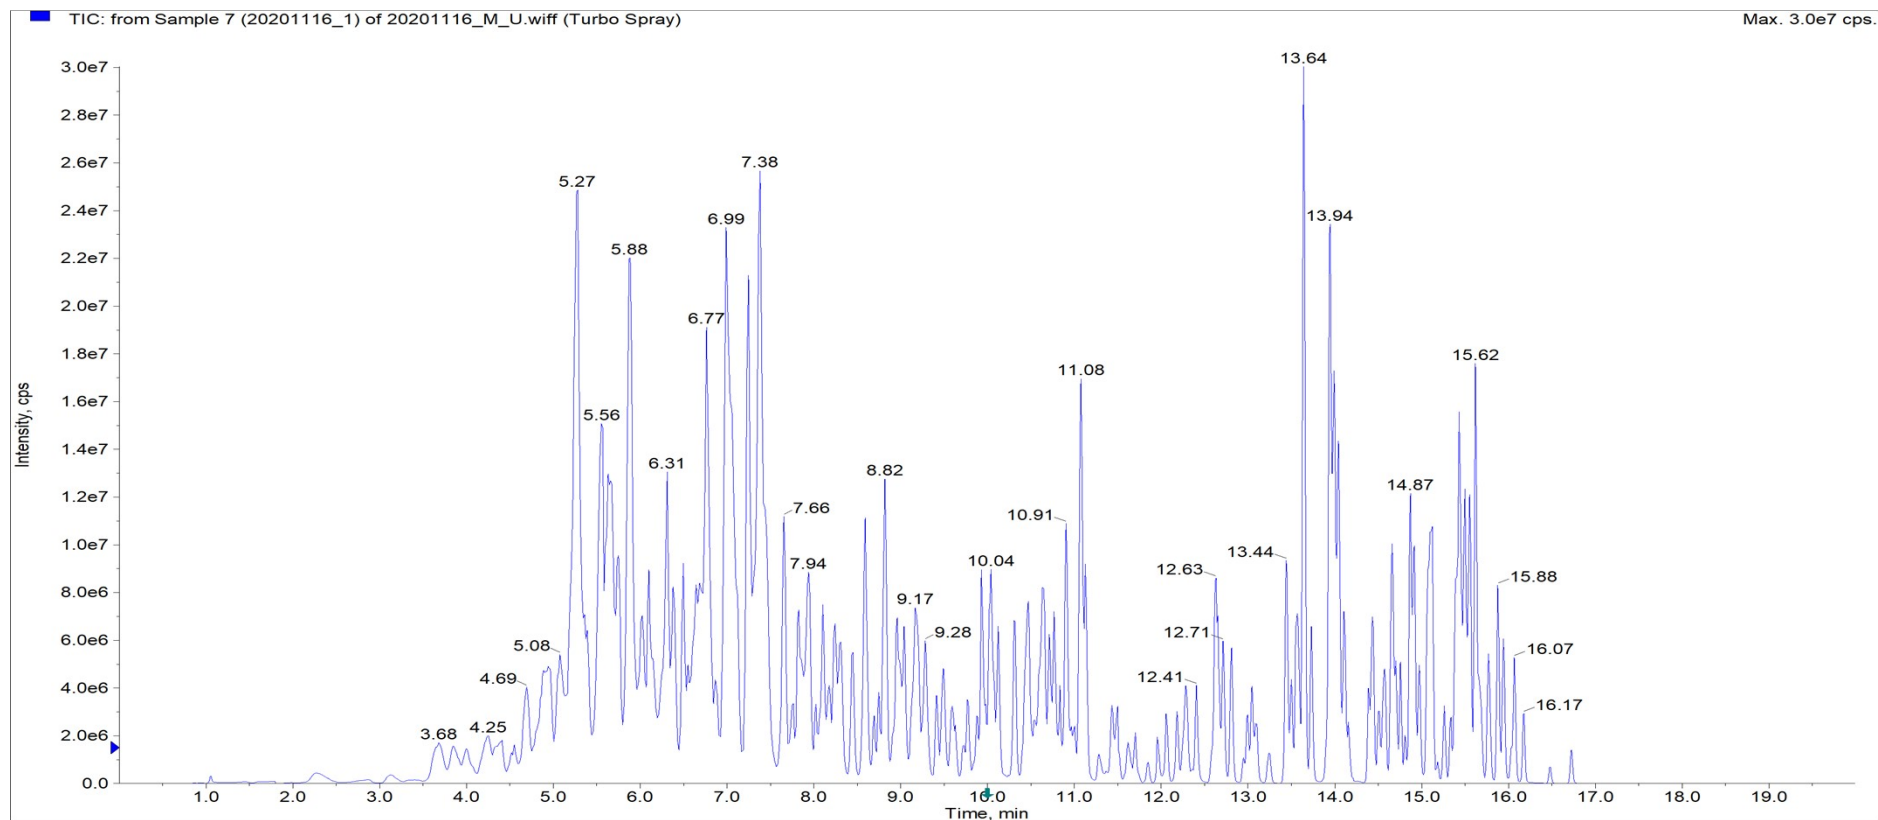

Figure S4. Chromatogram for fortified sample (TOX11911) 100 ng mL<sup>-1</sup> (IS – Atrazine, t<sub>R</sub>=11.08 min).

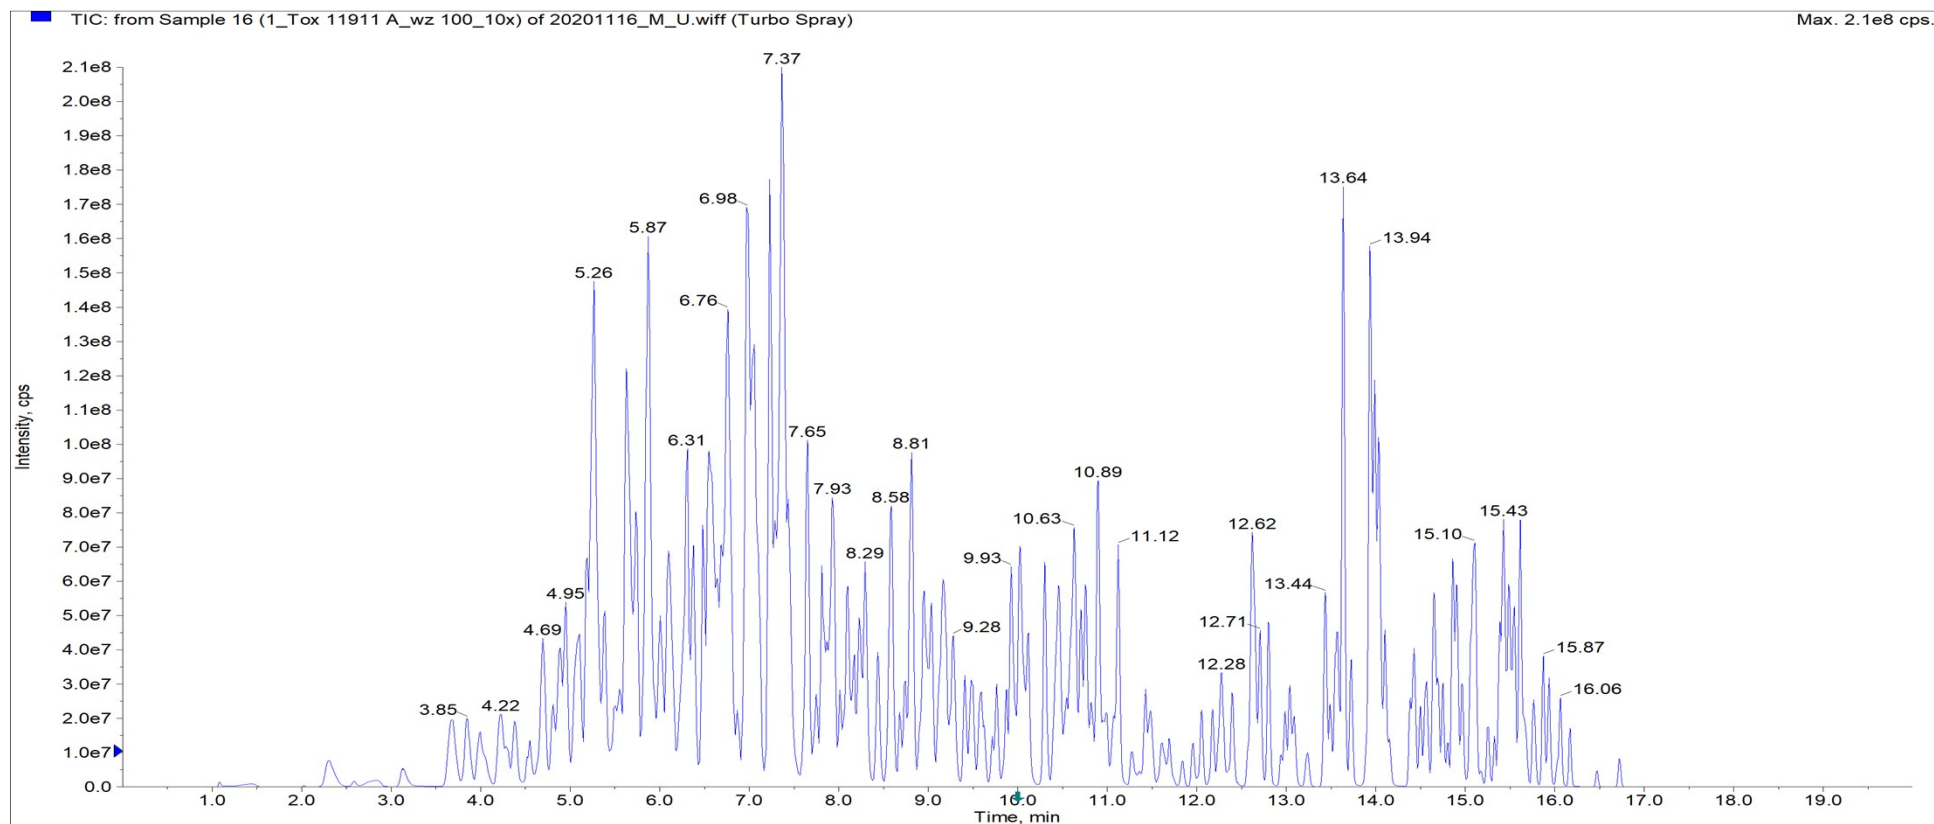



Figure S5. Chromatogram for sample TOX11911 (IS – Atrazine,  $t_R=11.08$  min).

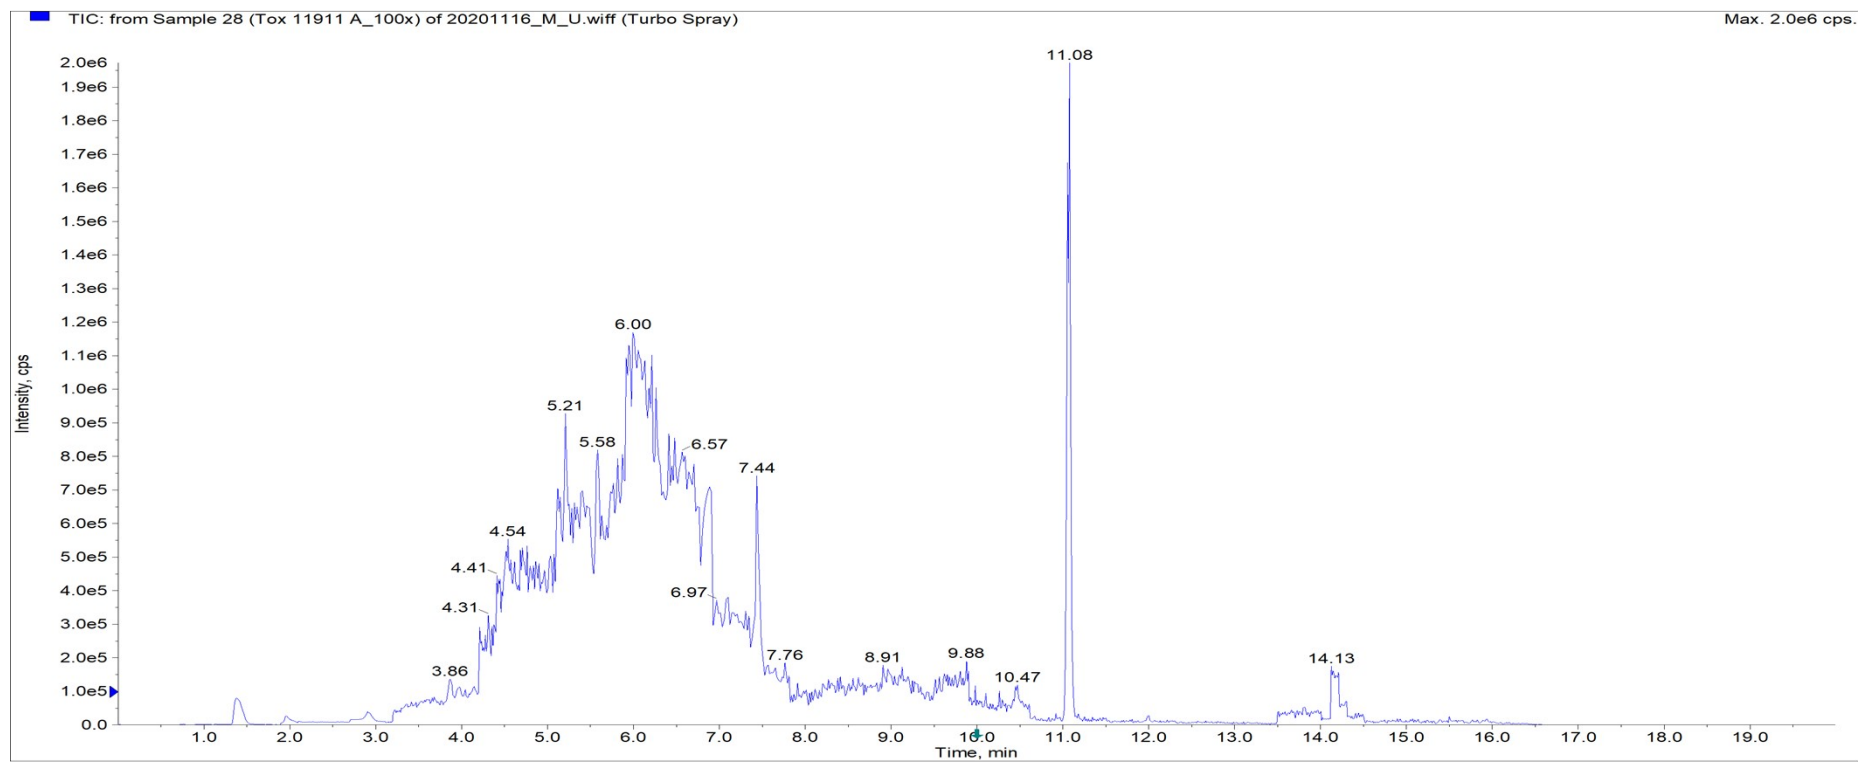

Supplement: d4ay00777h1.pdf [file d4ay00777h1.pdf]
